# Supplementary material for: Prognostic value of Modified Early Warning Score generated in a Chinese emergency department: a prospective cohort study
Source: PubMed Central journal article supplement — BMJ Open. 2018 Dec 14;8(12):e024120. doi: 10.1136/bmjopen-2018-024120 (PMC6303659; doi:10.1136/bmjopen-2018-024120), 2018-12-14
Supplement: bmjopen-2018-024120.draft_revisions.pdf [file bmjopen-2018-024120.draft_revisions.pdf]

# BMJ Open

BMJ Open is committed to open peer review. As part of this commitment we make the peer review history of every article we publish publicly available.

When an article is published we post the peer reviewers' comments and the authors' responses online. We also post the versions of the paper that were used during peer review. These are the versions that the peer review comments apply to.

The versions of the paper that follow are the versions that were submitted during the peer review process. They are not the versions of record or the final published versions. They should not be cited or distributed as the published version of this manuscript.

BMJ Open is an open access journal and the full, final, typeset and author-corrected version of record of the manuscript is available on our site with no access controls, subscription charges or pay-per-view fees (<http://bmjopen.bmj.com>).

If you have any questions on BMJ Open's open peer review process please email [info.bmjopen@bmj.com](mailto:info.bmjopen@bmj.com)

# BMJ Open

## Prognostic value of modified early warning score generated in a Chinese emergency department: A prospective cohort study

|                               |                                                                                                                                                                                                                                                                                                                                                                                                                                                                                                                                                                                                                                            |
|-------------------------------|--------------------------------------------------------------------------------------------------------------------------------------------------------------------------------------------------------------------------------------------------------------------------------------------------------------------------------------------------------------------------------------------------------------------------------------------------------------------------------------------------------------------------------------------------------------------------------------------------------------------------------------------|
| Journal:                      | <i>BMJ Open</i>                                                                                                                                                                                                                                                                                                                                                                                                                                                                                                                                                                                                                            |
| Manuscript ID                 | bmjopen-2018-024120                                                                                                                                                                                                                                                                                                                                                                                                                                                                                                                                                                                                                        |
| Article Type:                 | Research                                                                                                                                                                                                                                                                                                                                                                                                                                                                                                                                                                                                                                   |
| Date Submitted by the Author: | 12-May-2018                                                                                                                                                                                                                                                                                                                                                                                                                                                                                                                                                                                                                                |
| Complete List of Authors:     | Xie, Xiaohua; The Second People's Hospital of Shenzhen<br>Huang, Wenlong ; The People's Hospital of Longhua<br>Liu, Qionglin ; Guangdong Medical University, School of Nursing<br>Tan, Wei ; The Second People's Hospital of Shenzhen, Emergency Department<br>Pan, Lu ; The Second People's Hospital of Shenzhen<br>Wang, Lei ; Guangzhou Medical University, School of Nursing<br>Zhang, Jian ; Guangzhou Medical University, School of Nursing<br>Wang, Yunyun ; Anhui Medical University, School of Nursing<br>Zeng, Y; The Third Affiliated Hospital of Guangzhou Medical University, Research Institute of Gynecology and Obstetrics |
| Keywords:                     | ("Modified Early Warning Score") OR "MEWS", ("Emergency") AND "triage", Emergency department                                                                                                                                                                                                                                                                                                                                                                                                                                                                                                                                               |
|                               |                                                                                                                                                                                                                                                                                                                                                                                                                                                                                                                                                                                                                                            |

SCHOLARONE™  
Manuscripts

Only

**Title: Prognostic value of modified early warning score generated in a Chinese emergency department: A prospective cohort study**

Xiaohua Xie,<sup>1</sup> Wenlong Huang,<sup>2</sup> Qionglin Liu,<sup>3</sup> Wei Tan,<sup>4</sup> Lu Pan,<sup>5</sup> Lei Wang,<sup>6</sup> Jian Zhang,<sup>6</sup> Yunyun Wang,<sup>7</sup> Yingchun Zeng<sup>8</sup>

<sup>1</sup>Department of Nursing, The Second People's Hospital of Shenzhen, The First Affiliated Hospital of Shenzhen University, Shenzhen, China

<sup>2</sup>Department of Nursing, The People's Hospital of Longhua, Shenzhen, China

<sup>3</sup>School of Nursing, Guangdong Medical University, Dongguan, China

<sup>4</sup>Emergency Department, The Second People's Hospital of Shenzhen, The First Affiliated Hospital of Shenzhen University, Shenzhen, China

<sup>5</sup>Department of Intensive Care Unit, The Second People's Hospital of Shenzhen, The First Affiliated Hospital of Shenzhen University, Shenzhen, China

<sup>6</sup>School of Nursing, Guangzhou Medical University, Guangzhou, China

<sup>7</sup>School of Nursing, Anhui Medical University, Hefei, China

<sup>8</sup>Research Institute of Gynecology and Obstetrics, The Third Affiliated Hospital of Guangzhou Medical University, Guangzhou, China

**Corresponding author:**

Yingchun Zeng

Research Institute of Gynecology and Obstetrics,

The Third Affiliated Hospital of Guangzhou Medical University,

Guangzhou,

China 510150

Tel: +86-2081292216

Email: [chloezengyc@hotmail.co.uk](mailto:chloezengyc@hotmail.co.uk)

## ABSTRACT

**Objectives** This study aimed to validate the performance of the Modified Early Warning Score (MEWS) in a Chinese emergency department, and to find out the best cut-off value for in-hospital mortality prediction.

**Design** A prospective, single-centered observational cohort study.

**Setting** This study was conducted at a tertiary hospital in southeast china.

**Participants** 383 patients, ages 18 years or older and triaged Category 1, 2 or 3 in the emergency treatment room, were enrolled, and who presented to the emergency department from May 17, 2017 until September 27, 2017.

**Results** A total of 383 patients were included in this study. In-hospital mortality was 13.6% (52/383), and transfer to the ICU was 21.7 % (83/383). The area under the ROC curve of MEWS for in-hospital mortality prediction was 0.83 (95% CI: 0.786, 0.881). When the cut-off point was defined as 3.5, 158 patients had MEWS>3.5, with a specificity of 66%, a sensitivity of 87%, an accuracy of 69%, a positive predictive value of 28% and a negative predictive value of 97%, respectively, when predicting in-hospital mortality.

**Conclusion** Our findings support the use of MEWS for in-hospital mortality prediction in patients who were triaged Category 1, 2 and 3 in a Chinese emergency department. The cut-off value for in-hospital mortality prediction defined in this study was different from many other studies.

**Keywords:** Modified Early Warning Score; triage; in-hospital mortality; Emergency department

### Study Strengths and limitations

- This prospective observational study was carried out according to workflow, which is a less cost effective and reduces the difficulty for data collection.
- This study evaluated the ability of the MEWS to predict in-hospital mortality in Chinese patients presenting to the emergency treatment.
- This study evaluated the MEWS on patient admission once only, so dynamic changes in the score cannot be observed during patient hospitalization.
- This prospective cohort study recruited participants at a single medical center, which could limit the generalizability of study findings.

## INTRODUCTION

Different kinds of triage systems have been developed around the world to assess the illness severity of patients presenting to emergency departments (ED) who are assigned treatment priorities.<sup>1,2</sup> In China, there was lacking of unified triage standard used to arrange patients when present to emergency department.<sup>3</sup> The triage standard used in hospitals in Shenzhen is a new four-level Chinese emergency triage criteria, published by the Public Hospital Administration of Shenzhen Municipality in August, 2013.<sup>3</sup> It categorizes patients as endangered (Level 1), critically ill (Level 2), acute (Level 3) and not acute (Level 4), requiring treatment immediately, in 10 minutes, in 30 minutes and in 4 hours, respectively. This is mainly decided according to patients' presenting complaints and questions about potentially aggravating factors. According to acuity, Level 1, Level 2 and Level 3 are urgent patients with a higher risk of serious adverse events, such as hospital admission and mortality, compared to Level 4, which describes non-urgent patients.<sup>4,5</sup>

Therefore, an excellent scoring system is urgently required for mortality predictions of patients coming to the ED. Today, there are a number of scoring systems designed to detect deteriorating patients to predict the chance of hospitalization, intensive care unit admission or in-hospital mortality in emergency department ED patients.<sup>6,7</sup> The VitalPac Early Warning Score (VIEWS), modified early warning score (MEWS), Rapid Emergency Medicine Score (REMS), Emergency Department Sepsis Score (MEDS) and Rapid Acute Physiology Score are the most commonly employed systems for bedside evaluation.<sup>8-11</sup>

MEWS was introduced in 2001 by UK professor Subbe,<sup>12</sup> who modified it from the early warning scores (EWS). The MEWS is a simple physiological scoring system, which includes

1  
2  
3 five physiological parameters that can easily be collected at the moment of presentation: systolic  
4 blood pressure, pulse rate, respiratory rate, temperature and level of consciousness. The MEWS  
5 is widely used in wards, the ICU and emergency departments to detect the clinical deterioration  
6 of patients or to predict clinical outcomes.<sup>6,7,13</sup>  
7  
8  
9  
10  
11  
12

13 A large number of studies have reported that MEWS is an effective tool for in-hospital  
14 mortality prediction.<sup>15-17</sup> However, there have also been studies conducted on different  
15 populations or in different areas reporting that MEWS is not an adequate scoring system to  
16 predict in-hospital mortality.<sup>18,19</sup> Moreover, the cut-off value of MEWS for in-hospital mortality  
17 prediction reported in studies varied.<sup>10 9,15,20-22</sup> A study conducted on 518 Patients in ICU  
18 indicated that Patients with  $MEWS \geq 6$  had significantly higher mortality than those with a  
19  $MEWS < 6$ .<sup>22</sup> However, another study about the performance of MEWS in non-traumatic critical  
20 patients in emergency department showed that the MEWS cut-off value was 3.<sup>15</sup> Therefore, this  
21 study hypothesizes that MEWS performance and the cut-off value may differ according to the  
22 specific population.  
23  
24  
25  
26  
27  
28  
29  
30  
31  
32  
33  
34  
35  
36

37 The MEWS is also used to evaluate patient conditions in Chinese emergency departments,  
38 including focusing on the relationship between factors and clinical outcomes, using MEWS in  
39 prehospital for identifying non-trauma patients requiring life-saving intervention, risk  
40 stratification of patients before inter-facility transport.<sup>23-25</sup> However, information is limited on  
41 MEWS validation for in-hospital mortality predictions in patients triaged Level 1, 2 and 3 in  
42 Chinese emergency departments. Hence, the aim of this study was to evaluate MEWS  
43 performance in predicting in-hospital mortality of population in a Chinese emergency treatment  
44 room, and find the best cut-off value.  
45  
46  
47  
48  
49  
50  
51  
52  
53  
54  
55  
56  
57  
58  
59  
60

## METHODS

### Study design

A prospective, single-centered observational cohort study was conducted at the ED of a tertiary hospital, Shenzhen, China to evaluate the ability of the MEWS to predict in-hospital mortality in patients presenting to the emergency treatment room, who were categorized Levels 1, 2 and 3.

The study was approved by the ethical committee of the Hospital.

### Study population

The study was carried out at the tertiary hospital, which is the First Affiliated Hospital of Shenzhen University with 173,000 ED presentations in 2017. of 173,000 ED presentations, approximately 6,600 patients were admitted to the emergency treatment room. Data of patients presenting to the emergency treatment room between May 17, 2017 and September 27, 2017 were collected. Eligibility criteria: patients ages 18 years or older triaged as Category 1, 2 and 3 were included in the study. Exclusion criteria: Patients who had died prior to arrival in the ED, and patients, who needed ward admission, ICU admission or rescue according to the doctor's judgment, ignored the suggestions of doctors and left the hospital due to a variety of reasons were excluded from the study. Patients with insufficient information were also excluded.

### Study procedure

Patients who presented to our ED were evaluated and triaged by the triage nurse, who had more than five years of experience. Patients were triaged to endangered (Level 1), critically ill (Level 2), acute (Level 3) and not acute (Level 4). This is decided according to the triage guidelines and judgement of triage nurse. According to acuity, patients triage to Level 1 and Level 2 were sent



1  
2  
3 to emergency treatment room; Patients triage to Level 3 were given a priority to the consulting  
4 room or arranged to emergency treatment room if the triage nurse judge the patients as serious;  
5  
6 Patients triage to Level 4 were arranged to waiting outside the consulting room.  
7  
8  
9

10  
11 Physiological parameters were measured by nurses and researchers at the time of admitted to  
12 emergency treatment room. Respiratory rate was counted manually for more than a full minute;  
13  
14 heart rate and blood pressure were measured using an automatic electronic sphygmomanometer  
15 (HBP-9020) or multifunctional ECG monitor (PHILIPS Jin Kewei, G30). Body temperature was  
16  
17 measured using an infrared ear thermometer (Pr04000). The level of consciousness was recorded  
18  
19 as the best response to the AVPU score (A for alert, V for reacting to vocal stimulus, P for  
20  
21 reacting to pain and U for unresponsive).  
22  
23  
24  
25  
26  
27

28 Patient information was recorded using a questionnaire designed by the researchers. The  
29  
30 following information was included: age, sex, nationality, educational background, 'mode of  
31  
32 transportation' to hospital, disease types, main diagnosis, body temperature, systolic blood  
33  
34 pressure, diastolic blood pressure, pulse rate, respiratory rate, peripheral oxygen saturation, and  
35  
36 the AVPU (A: alert, V: voice, P: pain, and U: unresponsive) score, triage level, MEWS score  
37  
38 (Appendix 1), and mortality.  
39  
40  
41

42 The patients were followed up by the researcher until discharge, death or for a maximum of 90  
43  
44 days. The researchers calculated the MEWS using patients' recorded five physiological  
45  
46 parameters. In-hospital mortality was the main outcome. The predictive accuracy of the MEWS  
47  
48 was evaluated by the Receiver Operating Characteristic (ROC) curve. Sensitivity, specificity,  
49  
50 accuracy, and positive and negative predictive value (PPV and NPV) were analyzed to indicate  
51  
52 the predictive power of the scoring system. The patients were divided into two groups: MEWS<  
53  
54  
55  
56  
57  
58  
59  
60

1  
2  
3 4 and MEWS $\geq$ 4. The intergroup differences in the baseline characteristic physiological  
4  
5 parameters and the scores between the two groups were also evaluated.  
6  
7

### 8 **Statistical analysis**

9  
10  
11 First, the data distribution of each variable between the MEWS $<$ 4 and the MEWS $\geq$ 4 groups  
12  
13 was compared. Continuous variables were given as mean with standard deviation and as median  
14  
15 with interquartile range values when the data did not show a normal distribution; categorical data  
16  
17 were expressed as absolute values and percentages. Inferential statistical analysis was using the t  
18  
19 test for normal distribution data, or Kruskal-Wallis rank sum test for non-normal distribution  
20  
21 data and chi-square tests for categorical data. Second, the area under the receiver operating  
22  
23 characteristic curve (AUC) was measured for evaluating the predictive ability of the MEWS.  
24  
25 Finally, sensitivity, specificity, accuracy, positive and negative predictive value (PPV and NPV)  
26  
27 were also analyzed. P $<$  0.05 was regarded as statistically significant. EPidata3.1 was used for  
28  
29 data entry, and then exported to tab-delimited text files. All analyses were performed using R  
30  
31 (<http://www.R-project.org>) and EmpowerStats software ([www.empowerstats.com](http://www.empowerstats.com), X&Y  
32  
33 solutions, Inc.Boston MA).  
34  
35  
36  
37  
38  
39  
40  
41  
42  
43

### 44 **RESULTS**

45  
46 A total of 516 patients met the eligibility criteria, with 133 patients excluded. Among the patients  
47  
48 who were excluded from the study, 10 had already died when they were sent to the ED, while 46  
49  
50 patients ignored the suggestions of doctors and left the hospital due to a variety of reasons in the  
51  
52 ED, and 65 patients also left the hospital after being admitted to the ward or ICU. Twelve  
53  
54 patients were excluded due to insufficient information (Figure 1). Finally, 383 patients were in  
55  
56  
57  
58  
59  
60

1  
2  
3 enrolled in the study. Of that total, 255 (66.6%) patients were male; the mean age of all patients  
4 was 59.6±18.3 years, and the ethnicity of the majority of patients was Han. Among the 383  
5 patients, 52.5% and 21.7% were admitted to the ward and ICU from the ED, respectively.  
6  
7 Nervous system, cardiovascular, and respiratory diseases were the three most common disease  
8 types seen in these patients, consisting of more than half of the population. In the baseline  
9 characteristics between groups MEWS<4 and MEWS≥4, a number of baseline characteristics  
10 showed significant differences, with P<0.05. Detailed patient baseline characteristics are shown  
11 in Table 1.  
12  
13  
14  
15  
16  
17  
18  
19  
20  
21

22 The patients were divided into two groups: MEWS ≥4 and MEWS <4. Physiological parameters  
23 include body temperature, systolic blood pressure, diastolic blood pressure, heart rate, respiratory  
24 rate, percutaneous oxygen saturation and mental status, which were different between the two  
25 groups, and the difference was statistically significant. However, between the two groups, there  
26 were no differences in terms of blood sugar and length of stay. In addition, a total of 277  
27 critically ill patients were triaged as Level 1 and Level 2, requiring treatment in under 10 minutes.  
28  
29 There were more critically ill patients in the MEWS≥4 group than in the MEWS<4 group  
30 (150/158 VS. 127/225, P <0.001). The proportion of in-hospital mortality was 13.6% (52/383),  
31 and most were in the MEWS≥4 group (7/52 VS. 45/52, P <0.001). Detailed physiological  
32 parameters of the two groups are indicated in Table 2.  
33  
34  
35  
36  
37  
38  
39  
40  
41  
42  
43  
44

45 The MEWS in-hospital mortality predictive ability is shown by area under the Receiver  
46 Operating Characteristic curve (AUC), at 0.83(95% CI, 0.786, 0.881) (Figure 2). When the  
47 MEWS threshold was 3.5, less than half of patients (158/383) had MEWS > 3.5, with a  
48 specificity of 66%, a sensitivity of 87%, an accuracy of 69%, a positive predictive value of 28%  
49 and a negative predictive value of 97% in predicting in-hospital mortality. Sensitivity, specificity,  
50  
51  
52  
53  
54  
55  
56  
57  
58  
59

1  
2  
3 accuracy, positive and negative predictive values at different MEWS thresholds were shown in  
4  
5 Table 3.  
6  
7  
8  
9

## 10 11 **DISCUSSION**

12  
13  
14 In this observational cohort study, the MEWS showed good performance for in-hospital  
15 mortality prediction with AUC values at 0.83. The higher the score, the higher the ratio of in-  
16 hospital mortality, indicating that MEWS was significantly correlated with patient mortality. In  
17 patients with MEWS  $\geq 4$ , compared with MEWS  $< 4$ , a number of variables, such as age, triage  
18 level, vital signs, means of arrival and disease type are influencing factors of death in ED  
19 patients. When the MEWS threshold was 3.5, it showed that 87% of in-hospital mortality can be  
20 correctly predicted. The study demonstrated that MEWS is an effective tool for in-hospital  
21 mortality prediction for ED patients who triage to Levels 1, 2, and 3.  
22  
23  
24  
25  
26  
27  
28  
29  
30  
31  
32

33 MEWS is a widely used scoring system in many countries, but differences between these studies,  
34 including study setting, population and disease types, led to different predictive ability of the  
35 MEWS. The AUC, specificity and sensitivity were the most common indexes reported in studies  
36 on MEWS performance.<sup>17, 20, 26,27</sup> A large proportion of studies reported that MEWS was an  
37 effective tool for mortality prediction, with AUC ranging from approximately 0.70-0.89 for the  
38 most frequently used threshold (MEWS=5), with the specificity and sensitivity reported in those  
39 studies ranging from 0.67-0.72, 0.65-0.71, respectively.<sup>9,17,20,26</sup> However, less information was  
40 provided on the accuracy, positive predictive value and negative predictive value of the score. In  
41 a single-center observational cohort study conducted at an urban tertiary care medical center in  
42 Chicago, adult patients who were suspected of contracting an infection in the hospital wards or  
43  
44  
45  
46  
47  
48  
49  
50  
51  
52  
53  
54  
55  
56  
57  
58  
59  
60

1  
2  
3 emergency department (ED) were included.<sup>20</sup> Discrimination for in-hospital mortality was  
4 moderate with MEWS AUC 0.73 (95% CI, 0.71-0.74).  
5  
6

7  
8 Furthermore, there are also studies demonstrating that MEWS is not an efficient system for  
9 mortality prediction with an approximate AUC of less than 0.6, with study populations that  
10 included septic patients admitted to medical wards, surgical patients presenting to emergency  
11 departments, and adults admitted to medical wards, respectively.<sup>9,17,22</sup> It showed that disease and  
12 population differences seem to strongly determine MEWS performance. However, MEWS  
13 performance in ED patients who were triaged as Level 1, 2 or 3 had not previously been  
14 validated. Our study found that mortality prediction for the MEWS is good (AUC, 0.83; 95% CI,  
15 0.79-0.88). Moreover, our study used EmpowerStats software for data analysis, so that the AUC  
16 figure was smooth and show the 95% confidence intervals.  
17  
18  
19  
20  
21  
22  
23  
24  
25  
26  
27  
28  
29

30 In our study, when the MEWS had a cut-point of 3.5, which resulted in a sensitivity of 87%, a  
31 specificity of 66%, accuracy of 69%, PPV of 28% and NPV of 97%. When combined of  
32 sensitivity and specificity, the maximum was defined as the best threshold. In order to increase  
33 the proportion of in-hospital mortality prediction and reduce missed diagnosis, sensitivity is  
34 more important than specificity in this study. When the threshold was 4.5, the specificity,  
35 accuracy and NPV improved at the cost of sensitivity and PPV, the number of death due to  
36 missed diagnosis increased from 6 to 16. Hence, this study defined the MEWS cut-point as 3.5,  
37 which was similar to a previous prospective study, whose MEWS cut-point was defined as 3.<sup>15</sup>  
38 However, the MEWS cut-point defined as 3 in this study was different from many other studies,  
39 whose MEWS cut-point defined as 5 or higher.<sup>10,20-22</sup> For the baseline characteristics of patients  
40 in this study, respiratory system diseases, digestive system diseases, circulatory system diseases  
41 and nervous system diseases consisted of 70.7% of the population and 67.3% of non-survivors,  
42  
43  
44  
45  
46  
47  
48  
49  
50  
51  
52  
53  
54  
55  
56  
57  
58  
59  
60

1  
2  
3 with the median (IQR) MEWS at 3 (3). Different kinds of diseases and populations may  
4 contribute to the difference. In general, our study provides evidence that the MEWS is an  
5 efficient system for in-hospital mortality prediction in an ED.  
6  
7  
8  
9

### 10 11 **Limitations and implications for future research**

12  
13  
14 There are several limitations in our study. First, this was a single-center observation cohort study  
15 in a tertiary hospital in Shenzhen, and the outcome of patients may be affected by the medical  
16 level of hospital, and so the performance of Modified Early Warning Score for in-hospital  
17 mortality prediction. Second, the population included in this study was selected according to  
18 triage criteria that were only published in Shenzhen. Therefore, our study results may not be  
19 generalizable to other settings. Third, we evaluated the MEWS only once, on patient admission.  
20 Dynamic changes in the score cannot be observed during patient hospitalization. Hence, we  
21 could not exclude the possibility that re-evaluation of this clinical score during hospitalization  
22 may improve or reduce the MEWS performance in this setting. In future, multicenter study  
23 should be conducted to reduce the effect that the sample size was not representative. On the  
24 contrary, due to varied performance of MEWS in different studies, research on specific disease is  
25 also needed for the use of MEWS more accurate.  
26  
27  
28  
29  
30  
31  
32  
33  
34  
35  
36  
37  
38  
39  
40  
41

### 42 **CONCLUSION**

43  
44  
45 This study found that MEWS was an accurate score for predicting in-hospital mortality in a  
46 Chinese emergency department. Future multi-centric prospective cohort studies are needed to  
47 validate the study findings.  
48  
49  
50  
51  
52  
53  
54  
55  
56  
57  
58  
59  
60

1  
2  
3 **Acknowledgments** We sincerely thank Xinglin Chen for her excellent assistance with the  
4  
5 statistical analyses.  
6  
7

8 **Contributions** Study design: XX, WH and QL; acquisition of data: WH; data analysis and  
9  
10 interpretation: all authors; project administration: XX and WT; manuscript first draft: XX and  
11  
12 WH; statistical analysis: WH; manuscript revision: YZ.  
13  
14  
15

16 **Funding** This work was supported by Science and technology department of Guangdong  
17  
18 province, China. grant number(2014A020212574).  
19  
20  
21

22 **Competing interests** None declared.  
23  
24

25 **Ethical approval** The study was approved by the ethical committee of the Second People's  
26  
27 Hospital of Shenzhen.  
28  
29

30 **Provenance and peer review** Not commissioned; externally peer reviewed.  
31  
32

33 **Data sharing statement** We are glad to share data collected in this study upon request from the  
34  
35 corresponding author  
36  
37  
38

39 **Open Access** This is an Open Access article distributed in accordance with the Creative  
40  
41 Commons Attribution Non Commercial (CC BY-NC 4.0) license, which permits others to  
42  
43 distribute, remix, adapt, build upon this work non-commercially, and license their derivative  
44  
45 works on different terms, provided the original work is properly cited and the use is non-  
46  
47 commercial. See: <http://creativecommons.org/licenses/by-nc/4.0/>  
48  
49  
50  
51  
52  
53  
54  
55  
56  
57  
58  
59  
60

## References

1. Krey J. Triage in emergency departments. Comparative evaluation of 4 international triage systems. *Med Klin Intensivmed Notfmed* 2016;111(2):124-133. doi: 10.1007/s00063-015-0069-0. Epub 2015 Sep 11.
2. Chang W, Liu HE, Goopy S, *et al.* Using the Five-Level Taiwan Triage and Acuity Scale Computerized System: Factors in Decision Making by Emergency Department Triage Nurses. *Clin Nurs Res* 2017;26(5):651-666. doi: 10.1177/1054773816636360. Epub 2016 Mar 2.
3. Peng L, Hammad K. Current status of emergency department triage in mainland China: A narrative review of the literature. *Nurs Health Sci* 2015;17(2):148-158. doi: 10.1111/nhs.12159. Epub 2014 Sep 8.
4. Municipality PHAoS. The hospital emergency triage guidelines (Trial). 2013.
5. Yuksen C, Sawatmongkornkul S, Suttabuth S, *et al.* Emergency severity index compared with 4-level triage at the emergency department of Ramathibodi University Hospital. *Asian Biomedicine* 2016;10(2): 155 - 161. doi: 10.5372/1905-7415.1002.477.
6. Zachariasse JM, Seiger N, Rood PP, *et al.* Validity of the Manchester Triage System in emergency care: A prospective observational study. *PloS one* 2017;12(2):e0170811. doi: 10.1371/journal.pone.0170811. eCollection 2017.
7. Nannan Panday RS, Minderhoud TC, Alam N, *et al.* Prognostic value of early warning scores in the emergency department (ED) and acute medical unit (AMU): A narrative review. *Eur J Intern Med* 2017;45:20-31. doi: 10.1016/j.ejim.2017.09.027. Epub 2017 Oct 7.
8. Mapp ID, Davis LL, Krowchuk H. Prevention of unplanned intensive care unit admissions and hospital mortality by early warning systems. *Dimens Crit Care Nurs* 2013;32(6):300-309. doi: 10.1097/DCC.0000000000000004.
9. Dundar ZD, Ergin M, Karamercan MA, *et al.* Modified Early Warning Score and VitalPac Early Warning Score in geriatric patients admitted to emergency department. *Eur J Emerg Med* 2016;23(6):406-412. doi: 10.1097/MEJ.0000000000000274.
10. Bulut M, Cebicci H, Sigirli D, *et al.* The comparison of modified early warning score with rapid emergency medicine score: a prospective multicentre observational cohort study on



- 1  
2  
3 medical and surgical patients presenting to emergency department. *Emerg Med J*  
4 2014;31(6):476-481. doi: 10.1136/emermed-2013-202444. Epub 2013 Apr 6.  
5  
6  
7 11. van Galen LS, Dijkstra CC, Ludikhuizen J, *et al.* A Protocolised Once a Day Modified Early  
8 Warning Score (MEWS) Measurement Is an Appropriate Screening Tool for Major Adverse  
9 Events in a General Hospital Population. *PLoS One* 2016;11(8):e0160811. doi:  
10 10.1371/journal.pone.0160811. eCollection 2016.  
11  
12  
13 12. Hung SK, Ng CJ, Kuo CF, *et al.* Comparison of the Mortality in Emergency Department  
14 Sepsis Score, Modified Early Warning Score, Rapid Emergency Medicine Score and Rapid  
15 Acute Physiology Score for predicting the outcomes of adult splenic abscess patients in the  
16 emergency department. *PloS one* 2017;12(11):e0187495. doi:  
17 10.1371/journal.pone.0187495. eCollection 2017.  
18  
19  
20 13. Subbe CP, Kruger M, Rutherford P, *et al.* Validation of a modified Early Warning Score in  
21 medical admissions. *QJM* 2001;94(10):521-526.  
22  
23  
24 14. Churpek MM, Yuen TC, Winslow C, *et al.* Differences in vital signs between elderly and  
25 nonelderly patients prior to ward cardiac arrest. *Crit Care Med* 2015;43(4):816. doi:  
26 10.1097/CCM.0000000000000818.  
27  
28  
29 15. Koksall O, Torun G, Ahun E, *et al.* The comparison of modified early warning score and  
30 Glasgow coma scale-age-systolic blood pressure scores in the assessment of nontraumatic  
31 critical patients in Emergency Department. *Niger J Clin Pract* 2016;19(6):761-765. doi:  
32 10.4103/1119-3077.178944.  
33  
34  
35 16. Delgado-Hurtado JJ, Berger A, Bansal AB. Emergency department Modified Early  
36 Warning Score association with admission, admission disposition, mortality, and length of  
37 stay. *J Community Hosp Intern Med Perspect* 2016;6(2):31456. doi:  
38 10.3402/jchimp.v6.31456. eCollection 2016.  
39  
40  
41 17. Churpek MM, Yuen TC, Winslow C, *et al.* Multicenter Development and Validation of a  
42 Risk Stratification Tool for Ward Patients. *Am J Respir Crit Care Med* 2014;190(6):649-655.  
43 doi: 10.1164/rccm.201406-1022OC.  
44  
45  
46 18. Tirota D, Gambacorta M, La Regina M, *et al.* Evaluation of the threshold value for the  
47 modified early warning score (MEWS) in medical septic patients: a secondary analysis of  
48 an Italian multicentric prospective cohort (SNOOPII study). *QJM* 2017;110(6):369-373. doi:  
49 10.1093/qjmed/hcw229.  
50  
51  
52  
53  
54  
55  
56  
57  
58  
59  
60

19. Ho le O, Li H, Shahidah N, *et al*, Hock Ong ME. Poor performance of the modified early warning score for predicting mortality in critically ill patients presenting to an emergency department. *World J Emerg Med* 2013;4(4):273-278. doi: 10.5847/wjem.j.1920-8642.2013.04.005.
20. Churpek MM, Snyder A, Han X, *et al*. Quick Sepsis-related Organ Failure Assessment, Systemic Inflammatory Response Syndrome, and Early Warning Scores for Detecting Clinical Deterioration in Infected Patients outside the Intensive Care Unit. *Am J Respir Crit Care Med* 2017;195(7):906. doi: 10.1164/rccm.201604-0854OC.
21. Kruisselbrink R, Kwizera A, Crowther M, *et al*. Modified Early Warning Score (MEWS) Identifies Critical Illness among Ward Patients in a Resource Restricted Setting in Kampala, Uganda: A Prospective Observational Study. *PloS one* 2016;11(3):e0151408. doi: 10.1371/journal.pone.0151408. eCollection 2016.
22. Reini K, Fredrikson M, Oscarsson A. The prognostic value of the Modified Early Warning Score in critically ill patients: a prospective, observational study. *Eur J Anaesthesiol* 2012;29(3):152-157. doi: 10.1097/EJA.0b013e32835032d8.
23. Gu M, Fu Y, Li C, *et al*. [The value of modified early warning score in predicting early mortality of critically ill patients admitted to emergency department]. *Zhonghua wei zhong bing ji jiu yi xue* 2015;27(8):687-690. doi: 10.3760/cma.j.issn.2095-4352.2015.08.014.
24. Leung SC, Leung LP, Fan KL, *et al*. Can prehospital Modified Early Warning Score identify non-trauma patients requiring life-saving intervention in the emergency department? *Emerg Med Australas* : EMA 2016;28(1):84-89. doi: 10.1111/1742-6723.12501. Epub 2015 Nov 25.
25. Lee LL, Yeung KL, Lo WY, *et al*. Evaluation of a simplified therapeutic intervention scoring system (TISS-28) and the modified early warning score (MEWS) in predicting physiological deterioration during inter-facility transport. *Resuscitation* 2008;76(1):47-51. DOI: 10.1016/j.resuscitation.2007.07.005
26. Eick C, Rizas KD, Grogabada P, *et al*. Autonomic Nervous System Activity as Risk Predictor in the Medical Emergency Department: A Prospective Cohort Study. *Crit Care Med* 2015;43(5):1079-1086. doi: 10.1097/CCM.0000000000000922.
27. Wheeler I, Price C, Sitch A, *et al*. Early warning scores generated in developed healthcare settings are not sufficient at predicting early mortality in Blantyre, Malawi: a prospective

1  
2  
3  
4  
5  
6  
7  
8  
9  
10  
11  
12  
13  
14  
15  
16  
17  
18  
19  
20  
21  
22  
23  
24  
25  
26  
27  
28  
29  
30  
31  
32  
33  
34  
35  
36  
37  
38  
39  
40  
41  
42  
43  
44  
45  
46  
47  
48  
49  
50  
51  
52  
53  
54  
55  
56  
57  
58  
59  
60

cohort study. *PloS one* 2013;8(3):e59830. doi: 10.1371/journal.pone.0059830. Epub 2013 Mar 29.

For peer review only

**Table 1** Baseline characteristics between groups MEWS<4 and MEWS≥4

| Characteristics            | All (n, %)<br>n=383 | MEWS<4<br>n=225 | MEWS≥4<br>n=158 | <i>P</i> value |
|----------------------------|---------------------|-----------------|-----------------|----------------|
| <b>Age</b> (Mean, SD)      | 59.6(18.3)          | 57.9(16.9)      | 62.1(19.9)      | 0.008          |
| <b>Gender</b>              |                     |                 |                 | 0.43           |
| Male                       | 255(66.6)           | 159 (70.7)      | 96 (60.8)       |                |
| Female                     | 128 (33.4)          | 66 (29.3)       | 62 (39.2)       |                |
| <b>Ethnicity</b>           |                     |                 |                 | 0.525          |
| Han                        | 376 (98.2)          | 222 (98.7)      | 154 (97.5)      |                |
| Hui                        | 1 (0.2)             | 0 (0.0)         | 1 (0.6)         |                |
| Manchu                     | 6 (1.6)             | 3 (1.3)         | 3 (1.9)         |                |
| <b>Means of arrival</b>    |                     |                 |                 | 0.009          |
| Walking                    | 123 (32.1)          | 86 (38.2)       | 37 (23.4)       |                |
| Wheelchair                 | 8 (2.1)             | 4 (1.8)         | 4 (2.5)         |                |
| Ambulance                  | 252 (66.8)          | 135 (60.0)      | 117 (74.1)      |                |
| <b>Triage</b>              |                     |                 |                 | <0.001         |
| Discharged from ED         | 38 (9.9)            | 31 (13.8)       | 7 (4.4)         |                |
| Observation room           | 51 (13.3)           | 39 (17.3)       | 12 (7.6)        |                |
| Ward admission             | 201 (52.5)          | 126 (56.0)      | 75 (47.5)       |                |
| ICU admission              | 83 (21.7)           | 28 (12.4)       | 55 (34.8)       |                |
| Died in ED                 | 10 (2.6)            | 1 (0.5)         | 9 (5.7)         |                |
| <b>Disease types</b>       |                     |                 |                 | 0.003          |
| Respiratory system         | 54 (14.1)           | 19 (8.4)        | 35 (22.2)       |                |
| Digestive system           | 36 (9.4)            | 23 (10.2)       | 13 (8.2)        |                |
| Cardiovascular system      | 82 (21.4)           | 50 (22.2)       | 32 (20.3)       |                |
| Nervous system             | 99 (25.8)           | 69 (30.7)       | 30 (19.0)       |                |
| Hematological system       | 3 (0.8)             | 3 (1.3)         | 0 (0.0)         |                |
| Endocrinologic, metabolism | 3 (0.8)             | 3 (1.3)         | 0 (0.0)         |                |
| Urinary system             | 15 (3.9)            | 7 (3.1)         | 8 (5.1)         |                |
| Trauma                     | 28 (7.3)            | 17 (7.56)       | 11 (7.0)        |                |
| Others                     | 63 (16.5)           | 34 (15.1)       | 29 (18.4)       |                |

Abbreviations: SD, standard deviation; ED, emergency department; ICU, intensive care unit.

**Table 2** Comparison of clinical parameters between patients MEWS<4 and MEWS≥4

| Parameters                   | All (n, %)   | MEWS<4      | MEWS≥4       | P value |
|------------------------------|--------------|-------------|--------------|---------|
|                              | n=383        | n=225       | n=158        |         |
| <b>Age</b> (Mean, SD)        | 59.6(18.3)   | 57.9(16.9)  | 62.1(19.9)   | 0.008   |
| <b>Gender</b>                |              |             |              | 0.430   |
| Male                         | 255(66.6)    | 159 (70.7)  | 96 (60.8)    |         |
| Female                       | 128(33.4)    | 66(29.3)    | 62(39.2)     |         |
| <b>Physiology</b> (Mean, SD) |              |             |              |         |
| Temperature (°C)             | 37.2 (1.0)   | 36.9 (0.6)  | 37.6 (1.2)   | <0.001  |
| SBP (mmHg)                   | 136.6 (33.6) | 140.9(29.6) | 130.3 (37.9) | 0.001   |
| DBP (mmHg)                   | 80.3 (21.1)  | 82.8(18.4)  | 76.80 (24.0) | 0.002   |
| Heart rate (bpm)             | 95.2 (30.8)  | 80.7(15.4)  | 116.0 (35.0) | <0.001  |
| Respiratory rate (bpm)       | 23.1 (6.3)   | 20.7(3.0)   | 26.6 (7.9)   | <0.001  |
| SPO2 median (IQR)            | 99.0 (4)     | 99(2)       | 98 (5)       | <0.001  |
| BS median (IQR)              | 8.0 (3.4)    | 8.0(3.2)    | 8.2 (3.6)    | 0.461   |
| LOS median (IQR)             | 12 (11)      | 11.0(9)     | 14 (14)      | 0.068   |
| <b>Mental status</b>         |              |             |              | <0.001  |
| Alert                        | 280 (73.1)   | 193 (85.8)  | 87 (55.1)    |         |
| Reacting to voice            | 39 (10.1)    | 21 (9.3)    | 18 (11.4)    |         |
| Reacting to pain             | 32 (8.4)     | 10 (4.4)    | 22 (13.9)    |         |
| Unresponsive                 | 32 (8.4)     | 1 (0.4)     | 31 (19.6)    |         |
| <b>Triage level</b>          |              |             |              | <0.001  |
| Level 1                      | 69 (18.0)    | 8 (3.6)     | 61 (38.6)    |         |
| Level 2                      | 208 (54.3)   | 119 (52.9)  | 89 (56.3)    |         |
| Level 3                      | 106 (27.7)   | 98 (43.6)   | 80(5.1)      |         |
| <b>Survivors</b>             | 331 (86.4)   | 218 (96.9)  | 113 (71.5)   | <0.001  |
| <b>Non-survivors</b>         | 52 (13.6)    | 7 (3.1)     | 45 (28.5)    | <0.001  |

Abbreviations: SD, standard deviation; bpm, beats or breaths per minute; BS, blood sugar; DBP, diastolic blood pressure; IQR, interquartile range, LOS, length of stay, SBP, systolic blood pressure; SPO, percutaneous oxygen saturation.

**Table 3** Performance of MEWS in predicting in-hospital mortality among patients triaged to Level 1, 2 and 3 who were admitted to ED

| MEWS             | Threshold | Specificity (%) | Sensitivity (%) | Accuracy (%) | PPV (%) | NPV (%) |
|------------------|-----------|-----------------|-----------------|--------------|---------|---------|
| >1.5(n. 295/383) | 1.5       | 26              | 98              | 36           | 17      | 99      |
| >2.5(n.208/383)  | 2.5       | 51              | 90              | 57           | 23      | 97      |
| >3.5(n.158/383)  | 3.5       | 66              | 87              | 69           | 28      | 97      |
| >4.5(n.113/383)  | 4.5       | 77              | 69              | 76           | 32      | 94      |
| >5.5(n.71/383)   | 5.5       | 87              | 58              | 84           | 42      | 93      |
| >6.5(n.48/383)   | 6.5       | 93              | 50              | 87           | 54      | 92      |
| >7.5(n.25/383)   | 7.5       | 96              | 25              | 87           | 52      | 89      |
| >8.5(n.15/383)   | 8.5       | 98              | 17              | 87           | 60      | 88      |
| >9.5(n.7/383)    | 9.5       | 99              | 7.0             | 87           | 57      | 87      |
| >10.5(n.3/383)   | 10.5      | 99              | 4.0             | 87           | 67      | 87      |
| >11.5(n.1/383)   | 11.5      | 99              | 0.0             | 86           | 0.0     | 86      |

Abbreviations: MEWS, Modified Early Warning Score; NPV, negative predictive value; PPV, positive predictive value.

1  
2  
3  
4  
5  
6  
7  
8  
9  
10  
11  
12  
13  
14  
15  
16  
17  
18  
19  
20  
21  
22  
23  
24  
25  
26  
27  
28  
29  
30  
31  
32  
33  
34  
35  
36  
37  
38  
39  
40  
41  
42  
43  
44  
45  
46  
47  
48  
49  
50  
51  
52  
53  
54  
55  
56  
57  
58  
59  
60

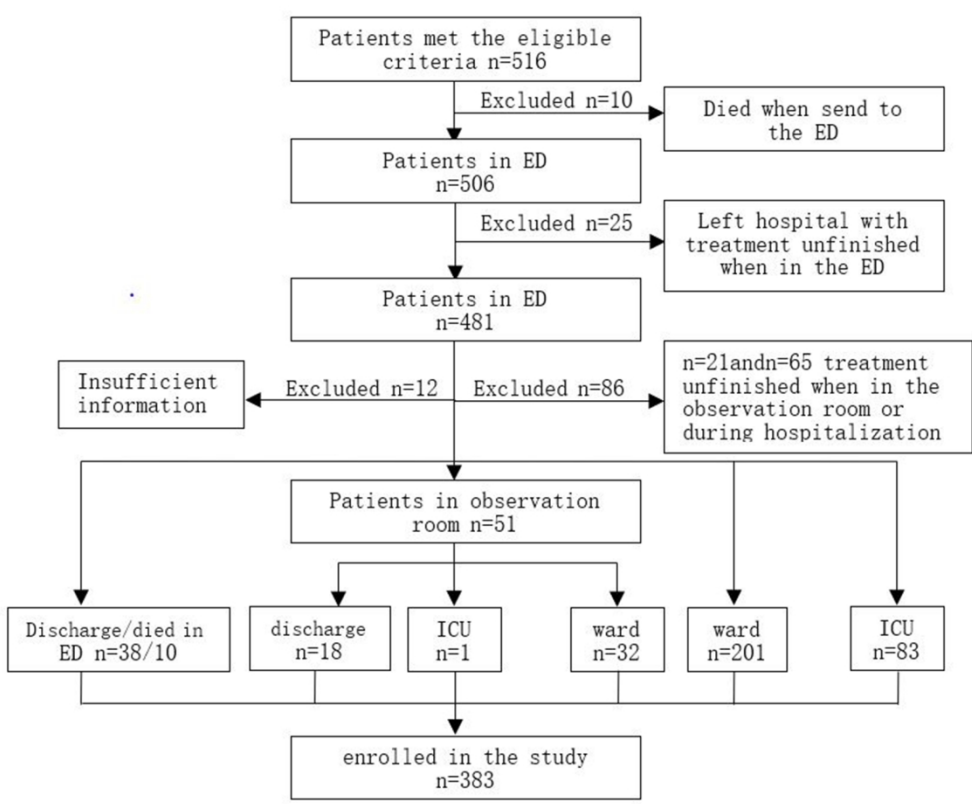

Figure 1 The flow chart of study procedure

Figure

149x137mm (300 x 300 DPI)

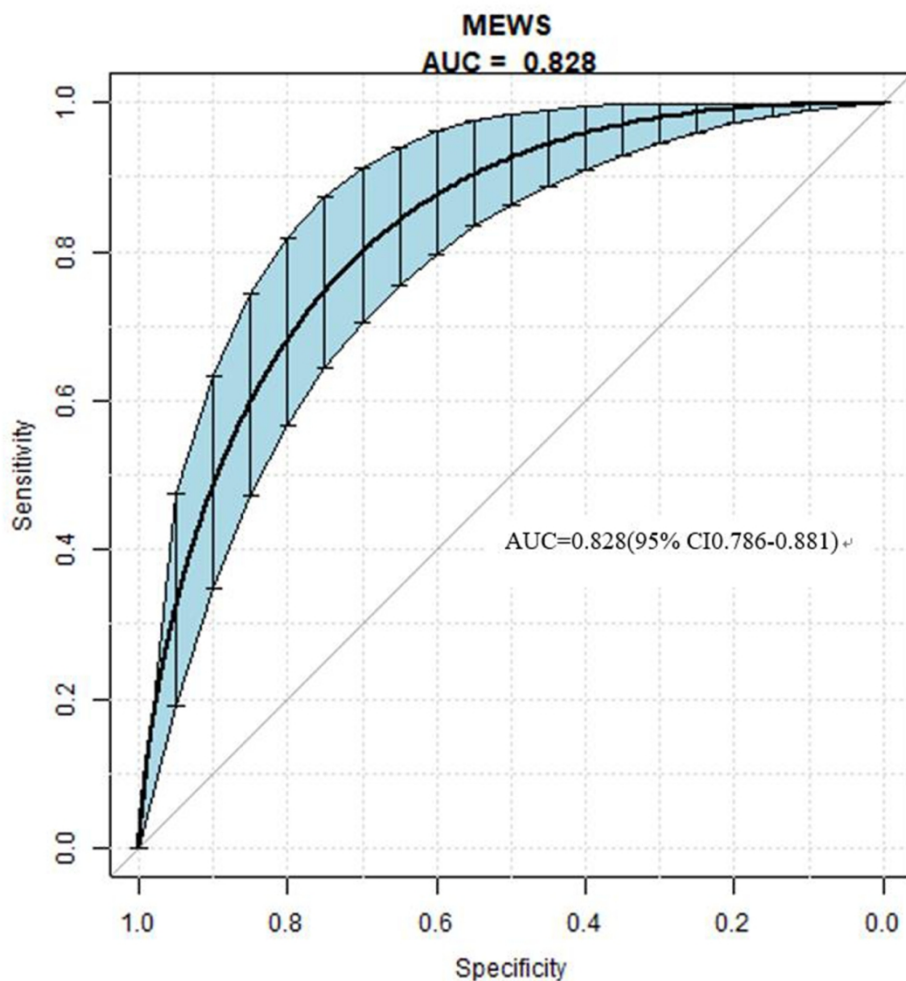

38 Figure 2 The AUC value of MEWS for predicting the in-hospital mortality.

39  
40 Blue shading shows the bootstrap estimated 95% CI with the AUC.

41  
42  
43 Figure

44 128x146mm (300 x 300 DPI)



**Appendix 1** The Modified Early Warning Score

| Parameters                     | 3   | 2     | 1      | 0       | 1                 | 2                | 3            |
|--------------------------------|-----|-------|--------|---------|-------------------|------------------|--------------|
| Respiratory rate (bpm)         | —   | <9    | —      | 9-14    | 15-20             | 21-29            | ≥30          |
| Heart rate (bpm)               | —   | <40   | 41-50  | 51-100  | 101-111           | 112-129          | ≥130         |
| Systolic blood pressure (mmHg) | <70 | 71-80 | 81-100 | 101-199 | —                 | ≥200             | —            |
| AVPU score                     | —   | —     | —      | Alert   | Reacting to voice | Reacting to pain | Unresponsive |
| Temperature (°C)               | —   | <35.0 | —      | 35-38.4 | —                 | ≥38.5            | —            |

AVPU, A: alert, V: Reacting to voice, P: Reacting to pain, U: unresponsive; bpm, beats or breaths per minute.

**STROBE 2007 (v4) Statement—Checklist of items that should be included in reports of *observational studies***

| Section/Topic                | Item # | Recommendation                                                                                                                                                                       | Reported on page # |
|------------------------------|--------|--------------------------------------------------------------------------------------------------------------------------------------------------------------------------------------|--------------------|
| Title and abstract           | 1      | (a) Indicate the study's design with a commonly used term in the title or the abstract                                                                                               | P1-2               |
|                              |        | (b) Provide in the abstract an informative and balanced summary of what was done and what was found                                                                                  | P3                 |
| <b>Introduction</b>          |        |                                                                                                                                                                                      |                    |
| Background/rationale         | 2      | Explain the scientific background and rationale for the investigation being reported                                                                                                 | P4-5               |
| Objectives                   | 3      | State specific objectives, including any prespecified hypotheses                                                                                                                     | P5                 |
| <b>Methods</b>               |        |                                                                                                                                                                                      |                    |
| Study design                 | 4      | Present key elements of study design early in the paper                                                                                                                              | P6                 |
| Setting                      | 5      | Describe the setting, locations, and relevant dates, including periods of recruitment, exposure, follow-up, and data collection                                                      | P6                 |
| Participants                 | 6      | (a) Give the eligibility criteria, and the sources and methods of selection of participants                                                                                          | P6                 |
| Variables                    | 7      | Clearly define all outcomes, exposures, predictors, potential confounders, and effect modifiers. Give diagnostic criteria, if applicable                                             | P6-7               |
| Data sources/<br>measurement | 8*     | For each variable of interest, give sources of data and details of methods of assessment (measurement). Describe comparability of assessment methods if there is more than one group | P6-7               |
| Bias                         | 9      | Describe any efforts to address potential sources of bias                                                                                                                            | P6                 |
| Study size                   | 10     | Explain how the study size was arrived at                                                                                                                                            | P6                 |
| Quantitative variables       | 11     | Explain how quantitative variables were handled in the analyses. If applicable, describe which groupings were chosen and why                                                         | P8                 |
| Statistical methods          | 12     | (a) Describe all statistical methods, including those used to control for confounding                                                                                                | P8                 |
|                              |        | (b) Describe any methods used to examine subgroups and interactions                                                                                                                  | P8                 |
|                              |        | (c) Explain how missing data were addressed                                                                                                                                          | P8                 |
|                              |        | (d) If applicable, describe analytical methods taking account of sampling strategy                                                                                                   | P8                 |
|                              |        | (e) Describe any sensitivity analyses                                                                                                                                                | P8                 |
| <b>Results</b>               |        |                                                                                                                                                                                      |                    |

|                          |     |                                                                                                                                                                                                              |        |
|--------------------------|-----|--------------------------------------------------------------------------------------------------------------------------------------------------------------------------------------------------------------|--------|
| Participants             | 13* | (a) Report numbers of individuals at each stage of study—eg numbers potentially eligible, examined for eligibility, confirmed eligible, included in the study, completing follow-up, and analysed            | P8-9   |
|                          |     | (b) Give reasons for non-participation at each stage                                                                                                                                                         | P8-9   |
|                          |     | (c) Consider use of a flow diagram                                                                                                                                                                           | P8-9   |
| Descriptive data         | 14* | (a) Give characteristics of study participants (eg demographic, clinical, social) and information on exposures and potential confounders                                                                     | P8-9   |
|                          |     | (b) Indicate number of participants with missing data for each variable of interest                                                                                                                          | P8-9   |
| Outcome data             | 15* | Report numbers of outcome events or summary measures                                                                                                                                                         | P8-10  |
| Main results             | 16  | (a) Give unadjusted estimates and, if applicable, confounder-adjusted estimates and their precision (eg, 95% confidence interval). Make clear which confounders were adjusted for and why they were included | P8-9   |
|                          |     | (b) Report category boundaries when continuous variables were categorized                                                                                                                                    | P8-9   |
|                          |     | (c) If relevant, consider translating estimates of relative risk into absolute risk for a meaningful time period                                                                                             | P8-9   |
| Other analyses           | 17  | Report other analyses done—eg analyses of subgroups and interactions, and sensitivity analyses                                                                                                               | P8-9   |
| <b>Discussion</b>        |     |                                                                                                                                                                                                              |        |
| Key results              | 18  | Summarise key results with reference to study objectives                                                                                                                                                     | P10-12 |
| Limitations              | 19  | Discuss limitations of the study, taking into account sources of potential bias or imprecision. Discuss both direction and magnitude of any potential bias                                                   | P12    |
| Interpretation           | 20  | Give a cautious overall interpretation of results considering objectives, limitations, multiplicity of analyses, results from similar studies, and other relevant evidence                                   | P12    |
| Generalisability         | 21  | Discuss the generalisability (external validity) of the study results                                                                                                                                        | P12    |
| <b>Other information</b> |     |                                                                                                                                                                                                              |        |
| Funding                  | 22  | Give the source of funding and the role of the funders for the present study and, if applicable, for the original study on which the present article is based                                                | P14    |

\*Give information separately for cases and controls in case-control studies and, if applicable, for exposed and unexposed groups in cohort and cross-sectional studies.

**Note:** An Explanation and Elaboration article discusses each checklist item and gives methodological background and published examples of transparent reporting. The STROBE checklist is best used in conjunction with this article (freely available on the Web sites of PLoS Medicine at <http://www.plosmedicine.org/>, Annals of Internal Medicine at <http://www.annals.org/>, and Epidemiology at <http://www.epidem.com/>). Information on the STROBE Initiative is available at [www.strobe-statement.org](http://www.strobe-statement.org).

# BMJ Open

## Prognostic value of Modified Early Warning Score generated in a Chinese emergency department: A prospective cohort study

|                                 |                                                                                                                                                                                                                                                                                                                                                                                                                                                                                                                                                                                                                                            |
|---------------------------------|--------------------------------------------------------------------------------------------------------------------------------------------------------------------------------------------------------------------------------------------------------------------------------------------------------------------------------------------------------------------------------------------------------------------------------------------------------------------------------------------------------------------------------------------------------------------------------------------------------------------------------------------|
| Journal:                        | <i>BMJ Open</i>                                                                                                                                                                                                                                                                                                                                                                                                                                                                                                                                                                                                                            |
| Manuscript ID                   | bmjopen-2018-024120.R1                                                                                                                                                                                                                                                                                                                                                                                                                                                                                                                                                                                                                     |
| Article Type:                   | Research                                                                                                                                                                                                                                                                                                                                                                                                                                                                                                                                                                                                                                   |
| Date Submitted by the Author:   | 04-Jul-2018                                                                                                                                                                                                                                                                                                                                                                                                                                                                                                                                                                                                                                |
| Complete List of Authors:       | Xie, Xiaohua; The Second People's Hospital of Shenzhen<br>Huang, Wenlong ; The People's Hospital of Longhua<br>Liu, Qionglin ; Guangdong Medical University, School of Nursing<br>Tan, Wei ; The Second People's Hospital of Shenzhen, Emergency Department<br>Pan, Lu ; The Second People's Hospital of Shenzhen<br>Wang, Lei ; Guangzhou Medical University, School of Nursing<br>Zhang, Jian ; Guangzhou Medical University, School of Nursing<br>Wang, Yunyun ; Anhui Medical University, School of Nursing<br>Zeng, Y; The Third Affiliated Hospital of Guangzhou Medical University, Research Institute of Gynecology and Obstetrics |
| <b>Primary Subject Heading</b>: | Nursing                                                                                                                                                                                                                                                                                                                                                                                                                                                                                                                                                                                                                                    |
| Secondary Subject Heading:      | Emergency medicine, Health services research                                                                                                                                                                                                                                                                                                                                                                                                                                                                                                                                                                                               |
| Keywords:                       | ("Modified Early Warning Score") OR "MEWS", ("Emergency") AND "triage", Emergency department                                                                                                                                                                                                                                                                                                                                                                                                                                                                                                                                               |
|                                 |                                                                                                                                                                                                                                                                                                                                                                                                                                                                                                                                                                                                                                            |

SCHOLARONE™  
Manuscripts

**Title: Prognostic value of Modified Early Warning Score generated in a Chinese emergency department: A prospective cohort study**

Xiaohua Xie,<sup>1</sup> Wenlong Huang,<sup>2</sup> Qionglin Liu,<sup>3</sup> Wei Tan,<sup>4</sup> Lu Pan,<sup>5</sup> Lei Wang,<sup>6</sup> Jian Zhang,<sup>6</sup>  
Yunyun Wang,<sup>7</sup> Yingchun Zeng<sup>8</sup>

<sup>1</sup>Department of Nursing, The Second People's Hospital of Shenzhen, The First Affiliated Hospital of Shenzhen University, Shenzhen, China

<sup>2</sup>Department of Nursing, The People's Hospital of Longhua, Shenzhen, China

<sup>3</sup>School of Nursing, Guangdong Medical University, Dongguan, China

<sup>4</sup>Emergency Department, The Second People's Hospital of Shenzhen, The First Affiliated Hospital of Shenzhen University, Shenzhen, China

<sup>5</sup>Department of Intensive Care Unit, The Second People's Hospital of Shenzhen, The First Affiliated Hospital of Shenzhen University, Shenzhen, China

<sup>6</sup>School of Nursing, Guangzhou Medical University, Guangzhou, China

<sup>7</sup>School of Nursing, Anhui Medical University, Hefei, China

<sup>8</sup>Research Institute of Gynecology and Obstetrics, The Third Affiliated Hospital of Guangzhou Medical University, Guangzhou, China

**Corresponding author:**

Yingchun Zeng

Research Institute of Gynecology and Obstetrics,

The Third Affiliated Hospital of Guangzhou Medical University,

Guangzhou,

China 510150

Tel: +86-2081292216

Email: [chloezengyc@hotmail.co.uk](mailto:chloezengyc@hotmail.co.uk)

## ABSTRACT

**Objectives** This study aimed to validate the performance of the Modified Early Warning Score (MEWS) in a Chinese emergency department, and to determine the best cut-off value for in-hospital mortality prediction.

**Design** A prospective, single-centred observational cohort study.

**Setting** This study was conducted at a tertiary hospital in South China.

**Participants** A total of 383 patients, ages 18 years or older who presented to the emergency department from May 17, 2017 until September 27, 2017, triaged as Category 1, 2, or 3, were enrolled.

**Outcomes** The primary outcome was a composite of in-hospital mortality and admission to the intensive care unit. The secondary outcome was using MEWS to predict hospitalised and discharged patients.

**Results** A total of 383 patients were included in this study. In-hospital mortality was 13.6% (52/383), and transfer to the ICU was 21.7 % (83/383). The area under the ROC curve of MEWS for in-hospital mortality prediction was 0.83 (95% CI: 0.786, 0.881). When the cut-off point was defined as 3.5, 158 patients had MEWS>3.5, with a specificity of 66%, a sensitivity of 87%, an accuracy of 69%, a positive predictive value of 28%, and a negative predictive value of 97%, respectively, when predicting in-hospital mortality.

**Conclusion** Our findings support the use of MEWS for in-hospital mortality prediction in patients who were triaged Category 1, 2, or 3 in a Chinese emergency department. The cut-off

1  
2  
3 value for in-hospital mortality prediction defined in this study was different from that seen in  
4  
5 many other studies.  
6  
7

8 **Keywords:** Modified Early Warning Score; triage; in-hospital mortality; Emergency department  
9  
10  
11  
12  
13  
14  
15  
16  
17  
18  
19  
20  
21  
22  
23  
24  
25  
26  
27  
28  
29  
30  
31  
32  
33  
34  
35  
36  
37  
38  
39  
40  
41  
42  
43  
44  
45  
46  
47  
48  
49  
50  
51  
52  
53  
54  
55  
56  
57  
58  
59  
60

For peer review only

### Study strengths and limitations

- This prospective observational study was carried out according to workflow, which is most cost-effective and reduces difficulty in data collection.
- This study used a prospective study design and provided a new cut-off point for the MEWS using ROC curve analysis to increase sensitivity in predicting in-hospital mortality.
- This study evaluated the MEWS only once, on patient admission, so dynamic changes in the score could not be observed during patient hospitalisation.
- This prospective cohort study recruited participants at a single medical centre, which could limit the generalisability of the study findings.



## INTRODUCTION

Different kinds of triage systems have been developed around the world to assess the illness severity of patients presenting to emergency departments (ED) who are assigned treatment priorities.<sup>1,2</sup> In China, there is a lack of a unified triage standard used to ? arrange patients when they present to the emergency department.<sup>3</sup> The triage standard used in hospitals in Shenzhen is a new four-level Chinese emergency triage criteria, published by the Public Hospital Administration of Shenzhen Municipality in August, 2013.<sup>3</sup> It categorises patients as near death (Level 1), critically ill (Level 2), acute (Level 3) and not acute (Level 4), requiring treatment immediately, in 10 minutes, in 30 minutes, and in four hours, respectively. This is mainly decided according to patients' presenting complaints and questions about potentially aggravating factors. According to acuity, Level 1, Level 2, and Level 3 are urgent patients with a higher risk of serious adverse events, such as hospital admission and mortality, compared to Level 4, which describes non-urgent patients.<sup>4,5</sup>

Therefore, an excellent scoring system is urgently required for mortality predictions in patients admitted to the ED. Today, there are a number of scoring systems designed to detect deteriorating patients to predict the chances of hospitalisation, intensive care unit (ICU) admission, or in-hospital mortality in emergency department ED patients.<sup>6,7</sup> The VitalPac Early Warning Score (VIEWS), modified early warning score (MEWS), Rapid Emergency Medicine Score (REMS), Emergency Department Sepsis Score (MEDS), and Rapid Acute Physiology Score are the most commonly employed systems for bedside evaluation.<sup>8-11</sup>

MEWS was introduced in 2001 by UK professor Subbe,<sup>12</sup> who modified it from the Early Warning Score (EWS). The MEWS is a simple physiological scoring system, which includes

1  
2  
3 five physiological parameters that can easily be collected at the moment of presentation: systolic  
4 blood pressure, pulse rate, respiratory rate, temperature, and level of consciousness. The MEWS  
5 is widely used in wards, the ICU and emergency departments to detect the clinical deterioration  
6 of patients or to predict clinical outcomes.<sup>6,7,13</sup>  
7  
8  
9  
10  
11  
12

13 A large number of studies have reported that MEWS is an effective tool for in-hospital  
14 mortality prediction.<sup>14-17</sup> However, there have also been studies conducted on different  
15 populations or in different areas reporting that MEWS is not an adequate scoring system for  
16 predicting in-hospital mortality.<sup>18,19</sup> Moreover, the MEWS cut-off value (for in-hospital mortality  
17 prediction reported in studies) varied.<sup>9,10,15,20-22</sup> A study conducted on 518 patients in ICU  
18 indicated that patients with  $MEWS \geq 6$  had significantly higher mortality than those with a  
19  $MEWS < 6$ .<sup>22</sup> However, another study on the performance of MEWS in non-traumatic critical  
20 patients in an emergency department showed the MEWS cut-off value was 3.<sup>15</sup> Therefore, this  
21 study hypothesises that MEWS performance and the cut-off value may differ according to the  
22 specific population.  
23  
24  
25  
26  
27  
28  
29  
30  
31  
32  
33  
34  
35  
36

37 The MEWS is also used to evaluate patient conditions in Chinese emergency departments,  
38 including focusing on the relationship between factors and clinical outcomes, using pre-hospital  
39 MEWS to identify non-trauma patients requiring life-saving intervention, and risk stratification  
40 of patients before inter-facility transport.<sup>23-25</sup> However, information is limited on MEWS  
41 validation for in-hospital mortality predictions in patients triaged as Level 1, 2, or 3 in Chinese  
42 emergency departments. Hence, the aim of this study was to evaluate MEWS performance in  
43 predicting in-hospital mortality of the population in a Chinese emergency treatment room, and to  
44 find the best cut-off value.  
45  
46  
47  
48  
49  
50  
51  
52  
53  
54  
55  
56  
57  
58  
59  
60

## METHODS

### Study design

A prospective, single-centred observational cohort study was conducted in the ED of a tertiary hospital in Shenzhen, China to evaluate the ability of the MEWS to predict in-hospital mortality in patients presenting to the emergency treatment room, who were categorised Levels 1, 2, or 3.

The study was approved by the hospital ethics committee.

### Study population

The study was carried out at the tertiary hospital, which is the First Affiliated Hospital of Shenzhen University with 173,000 ED presentations in 2017. Of 173,000 ED presentations, approximately 6,600 patients were admitted to the emergency treatment room. Data of patients presenting to the emergency treatment room between May 17, 2017 and September 27, 2017 were collected. Eligibility criteria: patients ages 18 years or older triaged as Category 1, 2, and 3 were included in the study. Exclusion criteria: Patients who had died prior to arrival in the ED, and patients who needed ward admission, ICU admission, or rescue according to the doctor's judgment, or who ignored the doctor's advice and left the hospital due to a variety of reasons, were excluded from the study. Patients with insufficient information were also excluded.

### Sample size calculation

This study calculated sample size using G\*Power 3.1.9.2 (<http://www.softpedia.com/get/Science-CAD/G-Power.shtml>). The estimated sample size was 319 with an accuracy index of 0.95, a marginal error of 0.05 with 95% confidence level and 80% power.

## Participant involvement and data collection

Patients who presented to our ED were evaluated and triaged by the triage nurse, who had more than five years of experience. Patients were triaged to near death (Level 1), critically ill (Level 2), acute (Level 3) and not acute (Level 4). This is decided according to the triage guidelines and the judgment of the triage nurse. According to acuity, patients triaged to Level 1 and Level 2 were sent to the emergency treatment room; patients triaged to Level 3 were given priority in the consulting room or sent to the emergency treatment room if the triage nurse judged the patient's condition to be serious; and patients triaged to Level 4 were sent to wait outside the consulting room.

Physiological parameters were measured by nurses and researchers at the time of admittance to the emergency treatment room. Respiratory rate was counted manually for more than a full minute; heart rate and blood pressure were measured using an automatic electronic sphygmomanometer (HBP-9020) or multifunctional ECG monitor (PHILIPS Jin Kewei, G30). Body temperature was measured using an infrared ear thermometer (Pr04000). The level of consciousness was recorded as the best response to the AVPU score (A for alert, V for reacting to vocal stimulus, P for reacting to pain and U for unresponsive).

Patient information was recorded using a questionnaire designed by the researchers. The following information was included: age, gender, nationality, educational background, 'mode of transportation' to hospital, disease type, main diagnosis, body temperature, systolic blood pressure, diastolic blood pressure, pulse rate, respiratory rate, peripheral oxygen saturation, and the AVPU (A: alert, V: voice, P: pain, and U: unresponsive) score, triage level, MEWS score (Appendix 1), and mortality.

1  
2  
3 The patients were followed up by the researcher until discharge, death, or for a maximum of 90  
4 days. The researchers calculated the MEWS using patients' recorded five physiological  
5 parameters. In-hospital mortality was the main outcome. The predictive accuracy of the MEWS  
6 was evaluated by the Receiver Operating Characteristic (ROC) curve. Sensitivity, specificity,  
7 accuracy, and positive and negative predictive value (PPV and NPV) were analysed to indicate  
8 the predictive power of the scoring system. The patients were divided into two groups: MEWS <  
9 4 and MEWS  $\geq$  4. The intergroup differences in the baseline characteristic physiological  
10 parameters and the scores between the two groups were also evaluated.  
11  
12  
13  
14  
15  
16  
17  
18  
19  
20  
21  
22

### 23 **Outcomes**

24  
25  
26 The primary outcome was a composite of in-hospital mortality and admission to the ICU. The  
27 secondary outcome was using MEWS to predict hospitalised and discharged patients.  
28  
29  
30

### 31 **Ethics statement**

32  
33  
34 This study was approved by the medical ethical committee of the Second People's Hospital of  
35 Shenzhen (No. 20141201005). Written informed consent was obtained from research participants  
36 or patients' legal agents.  
37  
38  
39  
40  
41

### 42 **Statistical analysis**

43  
44  
45 Descriptive statistics were tabulated for the overall sample. Mean and standard deviation were  
46 calculated for continuous variables, and frequencies and percentages for all other categorical  
47 variables. Data distribution of each variable between the MEWS <4 and the MEWS  $\geq$ 4 groups  
48 was compared. In addition, the area under the receiver operating characteristic curve (AUC) was  
49 measured to evaluate the predictive ability of the MEWS. Finally, sensitivity, specificity,  
50  
51  
52  
53  
54  
55  
56  
57  
58  
59  
60

1  
2  
3 accuracy, positive and negative predictive values (PPV and NPV) were also analysed.  
4  
5 Regression analysis was used to address confounding variables of age and gender.  $P < 0.05$  was  
6  
7 regarded as statistically significant. EPidata 3.1 was used for data entry, and then exported to tab-  
8  
9 delimited text files. All analyses were performed using R (<http://www.R-project.org>) and  
10  
11 EmpowerStats software ([www.empowerstats.com](http://www.empowerstats.com), X&Y solutions, Inc. Boston MA).  
12  
13  
14  
15  
16  
17  
18

## 19 RESULTS

20  
21 A total of 516 patients met the eligibility criteria, with 133 patients excluded. Among the patients  
22  
23 who were excluded from the study, 10 had already died when they were sent to the ED, while 46  
24  
25 patients in the ED ignored the advice of doctors and left the hospital due to a variety of reasons,  
26  
27 and 65 patients also left the hospital after being admitted to the ward or ICU. Twelve patients  
28  
29 were excluded due to insufficient information (Figure 1). Finally, 383 patients were enrolled in  
30  
31 the study. Of that total, 255 (66.6%) patients were male; the mean age of all patients was  
32  
33 59.6±18.3 years, and the ethnicity of the majority of patients was Han (98.2%). Among the 383  
34  
35 patients, 52.5% and 21.7% were admitted to the ward and ICU from the ED, respectively.  
36  
37 Nervous system, cardiovascular, and respiratory diseases were the three most common disease  
38  
39 types seen in these patients, consisting of more than half of the population. In the baseline  
40  
41 characteristics between groups MEWS  $< 4$  and MEWS  $\geq 4$ , a number of baseline characteristics  
42  
43 showed significant differences, with  $P < 0.05$ . Detailed patient baseline characteristics are shown  
44  
45 in Table 1.  
46  
47  
48  
49  
50

51 The patients were divided into two groups: MEWS  $\geq 4$  and MEWS  $< 4$ . Physiological parameters  
52  
53 include body temperature, systolic blood pressure, diastolic blood pressure, heart rate, respiratory  
54  
55  
56  
57  
58  
59  
60

1  
2  
3 rate, percutaneous oxygen saturation and mental status, which were different between the two  
4 groups, and the difference was statistically significant. However, between the two groups, there  
5 were no differences in terms of blood sugar and length of stay. In addition, a total of 277  
6 critically ill patients were triaged as Level 1 and Level 2, requiring treatment within 10 minutes.  
7  
8 There were more critically ill patients in the MEWS  $\geq 4$  group than in the MEWS  $< 4$  group  
9 (150/158 VS. 127/225,  $P < 0.001$ ). The proportion of in-hospital mortality was 13.6% (52/383),  
10 and most were in the MEWS  $\geq 4$  group (7/52 versus 45/52,  $P < 0.001$ ). Detailed physiological  
11 parameters of the two groups are indicated in Table 2.

12  
13 The MEWS in-hospital mortality predictive ability is shown by area under the Receiver  
14 Operating Characteristic curve (AUC), at 0.83 (95% CI, 0.786-0.881) (Figure 2). When the  
15 MEWS threshold was 3.5, less than half of patients (158/383) had MEWS  $> 3.5$ , with a  
16 specificity of 66%, a sensitivity of 87%, an accuracy of 69%, a positive predictive value of 28%,  
17 and a negative predictive value of 97% in predicting in-hospital mortality. Sensitivity, specificity,  
18 accuracy, positive and negative predictive values at different MEWS thresholds are shown in  
19 Table 3.

20  
21 Logistic regression analysis was used to examine the association between MEWS and the  
22 primary and secondary outcome measures. As seen in Table 4, the MEWS was significantly  
23 associated with in-hospital mortality (odds ratios-OR, 1.65; 95% CI, 1.44-1.89;  $P < 0.001$ ),  
24 admission to ICU (OR, 1.54; 95% CI, 1.39-1.72,  $P < 0.001$ ), and predicting hospitalised and  
25 discharged patients (OR, 1.55; 95% CI, 1.28-1.89,  $P < 0.001$ ) (Table 4). The MEWS in-hospital  
26 mortality, admission to ICU predictive ability and predicting ability of hospitalised and  
27 discharged patients are shown in Figure 2, Figure 3, and Figure 4, respectively.  
28  
29  
30  
31  
32  
33  
34  
35  
36  
37  
38  
39  
40  
41  
42  
43  
44  
45  
46  
47  
48  
49  
50  
51  
52  
53  
54  
55  
56  
57  
58  
59  
60

## DISCUSSION

In this observational cohort study, the MEWS showed good performance for in-hospital mortality prediction with AUC values at 0.83. The higher the score, the higher the ratio of in-hospital mortality, indicating that MEWS was significantly correlated with patient mortality. In patients with MEWS  $\geq 4$ , compared with MEWS  $< 4$ , a number of variables, such as age, triage level, vital signs, means of arrival and disease type are influencing factors of death in ED patients. When the MEWS threshold was 3.5, it showed that 87% of in-hospital mortality can be correctly predicted. The study demonstrated that MEWS is an effective tool for in-hospital mortality prediction for ED patients who triage to Levels 1, 2, and 3.

MEWS is a widely used scoring system in many countries, but differences between these studies, including study setting, population and disease types, has led to different predictive ability of the MEWS. The AUC, specificity and sensitivity were the most common indexes reported in studies on MEWS performance.<sup>17,20,26,27</sup> A large proportion of studies reported that MEWS was an effective tool for mortality prediction, with AUC ranging from approximately 0.70-0.89 for the most frequently used threshold (MEWS=5), with the specificity and sensitivity reported in those studies ranging from 0.67-0.72, 0.65-0.71, respectively.<sup>9,17,20,26</sup> However, less information was provided on the accuracy, positive predictive value and negative predictive value of the score. In a single-centre observational cohort study conducted at an urban tertiary care medical centre in Chicago, adult patients who were suspected of contracting an infection in a hospital ward or emergency department (ED) were included.<sup>20</sup> Discrimination for in-hospital mortality was moderate with MEWS AUC 0.73 (95% CI, 0.71-0.74).



1  
2  
3 Furthermore, there are also studies demonstrating that MEWS is not an efficient system for  
4 mortality prediction with an approximate AUC of less than 0.6, with study populations that  
5 included septic patients admitted to medical wards, surgical patients presenting to emergency  
6 departments, and adults admitted to medical wards, respectively.<sup>9,17,22</sup> It showed that disease and  
7 population differences seem to strongly determine MEWS performance. However, MEWS  
8 performance in ED patients who were triaged as Level 1, 2, or 3 had not previously been  
9 validated. Our study found that mortality prediction for the MEWS is good (AUC, 0.83; 95% CI,  
10 0.79-0.88).  
11  
12  
13  
14  
15  
16  
17  
18  
19  
20  
21

22 In this study, when the MEWS had a cut-off point of 3.5, it resulted in a sensitivity of 87%, a  
23 specificity of 66%, accuracy of 69%, PPV of 28% and NPV of 97%. When combined with  
24 sensitivity and specificity, the maximum was defined as the best threshold. In order to increase  
25 the proportion of in-hospital mortality prediction and reduce missed diagnoses, sensitivity is  
26 more important than specificity in this study. When the threshold was 4.5, the specificity,  
27 accuracy, and NPV improved at the cost of sensitivity and PPV, and the number of deaths due to  
28 missed diagnosis increased from 6 to 16. Hence, this study defined the MEWS cut-off point as  
29 3.5, which was similar to a previous prospective study, whose MEWS cut-off point was defined  
30 as 3.<sup>15</sup> However, the MEWS cut-off point defined as 3 in this study was different from that of  
31 many other studies, whose MEWS cut-off point was defined as 5 or higher.<sup>10,20-22</sup> For the  
32 baseline characteristics of patients in this study, respiratory system diseases, digestive system  
33 diseases, circulatory system diseases, and nervous system diseases were found in 70.7% of the  
34 population and 67.3% of non-survivors, with the median (IQR) MEWS at 3 (3). Different kinds  
35 of diseases and populations may have contributed to the difference. In general, our study  
36  
37  
38  
39  
40  
41  
42  
43  
44  
45  
46  
47  
48  
49  
50  
51  
52  
53  
54  
55  
56  
57  
58  
59  
60

1  
2  
3 provides evidence that the MEWS is an efficient system for in-hospital mortality prediction in an  
4  
5 ED.  
6  
7

### 8 **Limitations and implications for future research**

9

10  
11 There are several limitations in our study. First, this was a single-centre observational cohort  
12 study at a tertiary hospital in Shenzhen. Patient outcomes may have been affected by the level of  
13 care provided by the hospital, and may therefore have also affected the performance of the  
14 Modified Early Warning Score for in-hospital mortality prediction. Second, the population  
15 included in this study was selected according to triage criteria that were only published in  
16 Shenzhen. Therefore, our study results may not be generalisable to other settings. Third, we  
17 evaluated the MEWS only once, on patient admission. Dynamic changes in the score could not  
18 be observed during patient hospitalisation. Hence, we could not exclude the possibility that re-  
19 evaluation of this clinical score during hospitalisation may have improved or reduced the MEWS  
20 performance in this setting. In future, a multicentre study should be conducted to reduce the  
21 effect of the sample size not being representative. On the contrary, due to the varied performance  
22 of MEWS in different studies, research on specific diseases is also required, in order for the use  
23 of MEWS to be more accurate. While the actual number of enrolled subjects was 383 (higher  
24 than the required sample size of 319), there were 133 patients excluded in the analysis due to  
25 missing data resulting in potential selection bias. Thus, future research should implement  
26 strategies to minimise missing data on patient report forms.  
27  
28  
29  
30  
31  
32  
33  
34  
35  
36  
37  
38  
39  
40  
41  
42  
43  
44  
45  
46  
47  
48  
49  
50  
51  
52  
53  
54  
55  
56  
57  
58  
59  
60

## CONCLUSION

This study found that MEWS was an accurate score for predicting in-hospital mortality and admission to ICU in a Chinese emergency department. Future multi-centric prospective cohort studies are needed to validate the study findings.

For peer review only

1  
2  
3 **Acknowledgments** We sincerely thank Xinglin Chen for her excellent assistance with the  
4 statistical analyses. We also thank all patients for participating in this study.  
5  
6  
7

8 **Contributions** Study design: XX, WH and QL; data acquisition: WH; data analysis and  
9 interpretation: all authors; project administration: XX and WT; manuscript first draft: XX and  
10 WH; statistical analysis: WH; manuscript revision: YZ.  
11  
12  
13  
14  
15

16 **Funding** This work was supported by the Science and Technology Department of Guangdong  
17 Province, China. Grant number (2014A020212574).  
18  
19  
20  
21

22 **Competing interests** None declared.  
23  
24

25 **Ethical approval** The study was approved by the ethical committee of the Second People's  
26 Hospital of Shenzhen.  
27  
28  
29

30 **Provenance and peer review** Not commissioned; externally peer reviewed.  
31  
32

33 **Data sharing statement** We are glad to share data collected in this study upon request from the  
34 corresponding author.  
35  
36  
37  
38

39 **Open Access** This is an Open Access article distributed in accordance with the Creative  
40 Commons Attribution Non Commercial (CC BY-NC 4.0) license, which permits others to  
41 distribute, remix, adapt, build upon this work non-commercially, and license their derivative  
42 works on different terms, provided the original work is properly cited and the use is non-  
43 commercial. See: <http://creativecommons.org/licenses/by-nc/4.0/>.  
44  
45  
46  
47  
48  
49  
50  
51  
52  
53  
54  
55  
56  
57  
58  
59  
60

## References

1. Krey J. Triage in emergency departments. Comparative evaluation of 4 international triage systems. *Med Klin Intensivmed Notfmed* 2016;111(2):124-133. doi: 10.1007/s00063-015-0069-0. Epub 2015 Sep 11.
2. Chang W, Liu HE, Goopy S, *et al.* Using the Five-Level Taiwan Triage and Acuity Scale Computerized System: Factors in Decision Making by Emergency Department Triage Nurses. *Clin Nurs Res* 2017;26(5):651-666. doi: 10.1177/1054773816636360. Epub 2016 Mar 2.
3. Peng L, Hammad K. Current status of emergency department triage in mainland China: A narrative review of the literature. *Nurs Health Sci* 2015;17(2):148-158. doi: 10.1111/nhs.12159. Epub 2014 Sep 8.
4. Municipality PHAoS. The hospital emergency triage guidelines (Trial). 2013.
5. Yuksen C, Sawatmongkornkul S, Suttabuth S, *et al.* Emergency severity index compared with 4-level triage at the emergency department of Ramathibodi University Hospital. *Asian Biomedicine* 2016;10(2): 155 - 161. doi: 10.5372/1905-7415.1002.477.
6. Zachariasse JM, Seiger N, Rood PP, *et al.* Validity of the Manchester Triage System in emergency care: A prospective observational study. *PloS one* 2017;12(2):e0170811. doi: 10.1371/journal.pone.0170811. eCollection 2017.
7. Nannan Panday RS, Minderhoud TC, Alam N, *et al.* Prognostic value of early warning scores in the emergency department (ED) and acute medical unit (AMU): A narrative review. *Eur J Intern Med* 2017;45:20-31. doi: 10.1016/j.ejim.2017.09.027. Epub 2017 Oct 7.
8. Mapp ID, Davis LL, Krowchuk H. Prevention of unplanned intensive care unit admissions and hospital mortality by early warning systems. *Dimens Crit Care Nurs* 2013;32(6):300-309. doi: 10.1097/DCC.0000000000000004.
9. Dundar ZD, Ergin M, Karamercan MA, *et al.* Modified Early Warning Score and VitalPac Early Warning Score in geriatric patients admitted to emergency department. *Eur J Emerg Med* 2016;23(6):406-412. doi: 10.1097/MEJ.0000000000000274.
10. Bulut M, Cebicci H, Sigirli D, *et al.* The comparison of modified early warning score with rapid emergency medicine score: a prospective multicentre observational cohort study on

- 1  
2  
3 medical and surgical patients presenting to emergency department. *Emerg Med J*  
4 2014;31(6):476-481. doi: 10.1136/emmermed-2013-202444. Epub 2013 Apr 6.  
5  
6  
7 11. van Galen LS, Dijkstra CC, Ludikhuizen J, *et al.* A Protocolised Once a Day Modified Early  
8 Warning Score (MEWS) Measurement Is an Appropriate Screening Tool for Major Adverse  
9 Events in a General Hospital Population. *PLoS One* 2016;11(8):e0160811. doi:  
10 10.1371/journal.pone.0160811. eCollection 2016.  
11  
12  
13 12. Hung SK, Ng CJ, Kuo CF, *et al.* Comparison of the Mortality in Emergency Department  
14 Sepsis Score, Modified Early Warning Score, Rapid Emergency Medicine Score and Rapid  
15 Acute Physiology Score for predicting the outcomes of adult splenic abscess patients in the  
16 emergency department. *PloS one* 2017;12(11):e0187495. doi:  
17 10.1371/journal.pone.0187495. eCollection 2017.  
18  
19  
20 13. Subbe CP, Kruger M, Rutherford P, *et al.* Validation of a modified Early Warning Score in  
21 medical admissions. *QJM* 2001;94(10):521-526.  
22  
23  
24 14. Churpek MM, Yuen TC, Winslow C, *et al.* Differences in vital signs between elderly and  
25 nonelderly patients prior to ward cardiac arrest. *Crit Care Med* 2015;43(4):816. doi:  
26 10.1097/CCM.0000000000000818.  
27  
28  
29 15. Koksall O, Torun G, Ahun E, *et al.* The comparison of modified early warning score and  
30 Glasgow coma scale-age-systolic blood pressure scores in the assessment of nontraumatic  
31 critical patients in Emergency Department. *Niger J Clin Pract* 2016;19(6):761-765. doi:  
32 10.4103/1119-3077.178944.  
33  
34  
35 16. Delgado-Hurtado JJ, Berger A, Bansal AB. Emergency department Modified Early  
36 Warning Score association with admission, admission disposition, mortality, and length of  
37 stay. *J Community Hosp Intern Med Perspect* 2016;6(2):31456. doi:  
38 10.3402/jchimp.v6.31456. eCollection 2016.  
39  
40  
41 17. Churpek MM, Yuen TC, Winslow C, *et al.* Multicenter Development and Validation of a  
42 Risk Stratification Tool for Ward Patients. *Am J Respir Crit Care Med* 2014;190(6):649-655.  
43 doi: 10.1164/rccm.201406-1022OC.  
44  
45  
46 18. Tirota D, Gambacorta M, La Regina M, *et al.* Evaluation of the threshold value for the  
47 modified early warning score (MEWS) in medical septic patients: a secondary analysis of  
48 an Italian multicentric prospective cohort (SNOOPII study). *QJM* 2017;110(6):369-373. doi:  
49 10.1093/qjmed/hcw229.  
50  
51  
52  
53  
54  
55  
56  
57  
58  
59  
60

19. Ho le O, Li H, Shahidah N, *et al*, Hock Ong ME. Poor performance of the modified early warning score for predicting mortality in critically ill patients presenting to an emergency department. *World J Emerg Med* 2013;4(4):273-278. doi: 10.5847/wjem.j.1920-8642.2013.04.005.
20. Churpek MM, Snyder A, Han X, *et al*. Quick Sepsis-related Organ Failure Assessment, Systemic Inflammatory Response Syndrome, and Early Warning Scores for Detecting Clinical Deterioration in Infected Patients outside the Intensive Care Unit. *Am J Respir Crit Care Med* 2017;195(7):906. doi: 10.1164/rccm.201604-0854OC.
21. Kruisselbrink R, Kwizera A, Crowther M, *et al*. Modified Early Warning Score (MEWS) Identifies Critical Illness among Ward Patients in a Resource Restricted Setting in Kampala, Uganda: A Prospective Observational Study. *PloS one* 2016;11(3):e0151408. doi: 10.1371/journal.pone.0151408. eCollection 2016.
22. Reini K, Fredrikson M, Oscarsson A. The prognostic value of the Modified Early Warning Score in critically ill patients: a prospective, observational study. *Eur J Anaesthesiol* 2012;29(3):152-157. doi: 10.1097/EJA.0b013e32835032d8.
23. Gu M, Fu Y, Li C, *et al*. [The value of modified early warning score in predicting early mortality of critically ill patients admitted to emergency department]. *Zhonghua wei zhong bing ji jiu yi xue* 2015;27(8):687-690. doi: 10.3760/cma.j.issn.2095-4352.2015.08.014.
24. Leung SC, Leung LP, Fan KL, *et al*. Can prehospital Modified Early Warning Score identify non-trauma patients requiring life-saving intervention in the emergency department? *Emerg Med Australas* : EMA 2016;28(1):84-89. doi: 10.1111/1742-6723.12501. Epub 2015 Nov 25.
25. Lee LL, Yeung KL, Lo WY, *et al*. Evaluation of a simplified therapeutic intervention scoring system (TISS-28) and the modified early warning score (MEWS) in predicting physiological deterioration during inter-facility transport. *Resuscitation* 2008;76(1):47-51. DOI: 10.1016/j.resuscitation.2007.07.005
26. Eick C, Rizas KD, Grogabada P, *et al*. Autonomic Nervous System Activity as Risk Predictor in the Medical Emergency Department: A Prospective Cohort Study. *Crit Care Med* 2015;43(5):1079-1086. doi: 10.1097/CCM.0000000000000922.
27. Wheeler I, Price C, Sitch A, *et al*. Early warning scores generated in developed healthcare settings are not sufficient at predicting early mortality in Blantyre, Malawi: a prospective

1  
2  
3 cohort study. *PloS one* 2013;8(3):e59830. doi: 10.1371/journal.pone.0059830. Epub 2013  
4  
5 Mar 29.  
6  
7  
8  
9  
10  
11  
12  
13  
14  
15  
16  
17  
18  
19  
20  
21  
22  
23  
24  
25  
26  
27  
28  
29  
30  
31  
32  
33  
34  
35  
36  
37  
38  
39  
40  
41  
42  
43  
44  
45  
46  
47  
48  
49  
50  
51  
52  
53  
54  
55  
56  
57  
58  
59  
60

For peer review only



**Table 1** Baseline characteristics between groups MEWS<4 and MEWS≥4

| Characteristics            | All (n, %)<br>n=383 | MEWS<4<br>n=225 | MEWS≥4<br>n=158 | P value |
|----------------------------|---------------------|-----------------|-----------------|---------|
| <b>Age (Mean, SD)</b>      | 59.6(18.3)          | 57.9(16.9)      | 62.1(19.9)      | 0.008   |
| <b>Gender</b>              |                     |                 |                 | 0.43    |
| Male                       | 255(66.6)           | 159 (70.7)      | 96 (60.8)       |         |
| Female                     | 128 (33.4)          | 66 (29.3)       | 62 (39.2)       |         |
| <b>Ethnicity</b>           |                     |                 |                 | 0.525   |
| Han                        | 376 (98.2)          | 222 (98.7)      | 154 (97.5)      |         |
| Hui                        | 1 (0.2)             | 0 (0.0)         | 1 (0.6)         |         |
| Manchu                     | 6 (1.6)             | 3 (1.3)         | 3 (1.9)         |         |
| <b>Means of arrival</b>    |                     |                 |                 | 0.009   |
| Walking                    | 123 (32.1)          | 86 (38.2)       | 37 (23.4)       |         |
| Wheelchair                 | 8 (2.1)             | 4 (1.8)         | 4 (2.5)         |         |
| Ambulance                  | 252 (66.8)          | 135 (60.0)      | 117 (74.1)      |         |
| <b>Triage</b>              |                     |                 |                 | <0.001  |
| Discharged from ED         | 38 (9.9)            | 31 (13.8)       | 7 (4.4)         |         |
| Observation room           | 51 (13.3)           | 39 (17.3)       | 12 (7.6)        |         |
| Ward admission             | 201 (52.5)          | 126 (56.0)      | 75 (47.5)       |         |
| ICU admission              | 83 (21.7)           | 28 (12.4)       | 55 (34.8)       |         |
| Died in ED                 | 10 (2.6)            | 1 (0.5)         | 9 (5.7)         |         |
| <b>Disease types</b>       |                     |                 |                 | 0.003   |
| Respiratory system         | 54 (14.1)           | 19 (8.4)        | 35 (22.2)       |         |
| Digestive system           | 36 (9.4)            | 23 (10.2)       | 13 (8.2)        |         |
| Cardiovascular system      | 82 (21.4)           | 50 (22.2)       | 32 (20.3)       |         |
| Nervous system             | 99 (25.8)           | 69 (30.7)       | 30 (19.0)       |         |
| Hematological system       | 3 (0.8)             | 3 (1.3)         | 0 (0.0)         |         |
| Endocrinologic, metabolism | 3 (0.8)             | 3 (1.3)         | 0 (0.0)         |         |
| Urinary system             | 15 (3.9)            | 7 (3.1)         | 8 (5.1)         |         |
| Trauma                     | 28 (7.3)            | 17 (7.56)       | 11 (7.0)        |         |
| Others                     | 63 (16.5)           | 34 (15.1)       | 29 (18.4)       |         |

Abbreviations: SD, standard deviation; ED, emergency department; ICU, intensive care unit.

**Table 2** Comparison of clinical parameters between patients MEWS <4 and MEWS $\geq$ 4

| Parameters                   | All (n, %)<br>n=383 | MEWS<4<br>n=225 | MEWS $\geq$ 4<br>n=158 | P value |
|------------------------------|---------------------|-----------------|------------------------|---------|
| <b>Age</b> (Mean, SD)        | 59.6(18.3)          | 57.9(16.9)      | 62.1(19.9)             | 0.008   |
| <b>Gender</b>                |                     |                 |                        | 0.430   |
| Male                         | 255(66.6)           | 159 (70.7)      | 96 (60.8)              |         |
| Female                       | 128(33.4)           | 66(29.3)        | 62(39.2)               |         |
| <b>Physiology</b> (Mean, SD) |                     |                 |                        |         |
| Temperature ( $^{\circ}$ C)  | 37.2 (1.0)          | 36.9 (0.6)      | 37.6 (1.2)             | <0.001  |
| SBP (mmHg)                   | 136.6 (33.6)        | 140.9(29.6)     | 130.3 (37.9)           | 0.001   |
| DBP (mmHg)                   | 80.3 (21.1)         | 82.8(18.4)      | 76.80 (24.0)           | 0.002   |
| Heart rate (bpm)             | 95.2 (30.8)         | 80.7(15.4)      | 116.0 (35.0)           | <0.001  |
| Respiratory rate (bpm)       | 23.1 (6.3)          | 20.7(3.0)       | 26.6 (7.9)             | <0.001  |
| SPO2 median (IQR)            | 99.0 (4)            | 99(2)           | 98 (5)                 | <0.001  |
| BS median (IQR)              | 8.0 (3.4)           | 8.0(3.2)        | 8.2 (3.6)              | 0.461   |
| LOS median (IQR)             | 12 (11)             | 11.0(9)         | 14 (14)                | 0.068   |
| <b>Mental status</b>         |                     |                 |                        | <0.001  |
| Alert                        | 280 (73.1)          | 193 (85.8)      | 87 (55.1)              |         |
| Reacting to voice            | 39 (10.1)           | 21 (9.3)        | 18 (11.4)              |         |
| Reacting to pain             | 32 (8.4)            | 10 (4.4)        | 22 (13.9)              |         |
| Unresponsive                 | 32 (8.4)            | 1 (0.4)         | 31 (19.6)              |         |
| <b>Triage level</b>          |                     |                 |                        | <0.001  |
| Level 1                      | 69 (18.0)           | 8 (3.6)         | 61 (38.6)              |         |
| Level 2                      | 208 (54.3)          | 119 (52.9)      | 89 (56.3)              |         |
| Level 3                      | 106 (27.7)          | 98 (43.6)       | 8 0(5.1)               |         |
| <b>Survivors</b>             | 331 (86.4)          | 218 (96.9)      | 113 (71.5)             | <0.001  |
| <b>Non-survivors</b>         | 52 (13.6)           | 7 (3.1)         | 45 (28.5)              | <0.001  |

Abbreviations: SD, standard deviation; bpm, beats or breaths per minute; BS, blood sugar; DBP, diastolic blood pressure; IQR, interquartile range, LOS, length of stay, SBP, systolic blood pressure; SPO, percutaneous oxygen saturation.

**Table 3** Performance of MEWS in predicting in-hospital mortality among patients triaged to Level 1, 2, and 3 who were admitted to ED

| MEWS             | Threshold | Specificity (%) | Sensitivity (%) | Accuracy (%) | PPV (%) | NPV (%) |
|------------------|-----------|-----------------|-----------------|--------------|---------|---------|
| >1.5(n. 295/383) | 1.5       | 26              | 98              | 36           | 17      | 99      |
| >2.5(n.208/383)  | 2.5       | 51              | 90              | 57           | 23      | 97      |
| >3.5(n.158/383)  | 3.5       | 66              | 87              | 69           | 28      | 97      |
| >4.5(n.113/383)  | 4.5       | 77              | 69              | 76           | 32      | 94      |
| >5.5(n.71/383)   | 5.5       | 87              | 58              | 84           | 42      | 93      |
| >6.5(n.48/383)   | 6.5       | 93              | 50              | 87           | 54      | 92      |
| >7.5(n.25/383)   | 7.5       | 96              | 25              | 87           | 52      | 89      |
| >8.5(n.15/383)   | 8.5       | 98              | 17              | 87           | 60      | 88      |
| >9.5(n.7/383)    | 9.5       | 99              | 7.0             | 87           | 57      | 87      |
| >10.5(n.3/383)   | 10.5      | 99              | 4.0             | 87           | 67      | 87      |
| >11.5(n.1/383)   | 11.5      | 99              | 0.0             | 86           | 0.0     | 86      |

Abbreviations: MEWS, Modified Early Warning Score; NPV, negative predictive value; PPV, positive predictive value.

**Table 4** Association of MEWS with in-hospital mortality, admission to ICU, and predicting hospitalised and discharged patients

| MEWS                                            | Model 1 OR (95% CI)<br><i>P</i> | Model 2 OR (95% CI)<br><i>P</i> |
|-------------------------------------------------|---------------------------------|---------------------------------|
| In-hospital mortality                           | 1.66 (1.45, 1.90)<br><0.001     | 1.65 (1.44, 1.89)<br><0.001     |
| Admission to ICU                                | 1.52 (1.37, 1.69)<br><0.001     | 1.54 (1.39, 1.72)<br><0.001     |
| Predicting hospitalised and discharged patients | 1.54 (1.27, 1.86)<br><0.001     | 1.55 (1.28, 1.89)<br><0.001     |

Model 1, original model; Model 2 with adjustment for age and gender.

Presented as OR with 95% CI (MEWS  $\geq$ 4, and MEWS <4 as reference).

Abbreviation: CI, confidence intervals; ICU, intensive care unit; OR, odds ratios.

1  
2  
3 **Figure 1** The flow chart of study procedure  
4  
5

6  
7 **Figure 2** The AUC value of MEWS for predicting the in-hospital mortality  
8

9 Blue shading shows the bootstrap estimated 95% CI with AUC.  
10  
11

12  
13  
14 **Figure 3** The AUC value of MEWS for predicting admission to Intensive Care Unit  
15

16 Blue shading shows the bootstrap estimated 95% CI with AUC.  
17  
18

19  
20 **Figure 4** The AUC value of MEWS for predicting hospitalised and discharged patients  
21

22 Blue shading shows the bootstrap estimated 95% CI with AUC.  
23  
24  
25  
26  
27  
28  
29  
30  
31  
32  
33  
34  
35  
36  
37  
38  
39  
40  
41  
42  
43  
44  
45  
46  
47  
48  
49  
50  
51  
52  
53  
54  
55  
56  
57  
58  
59  
60

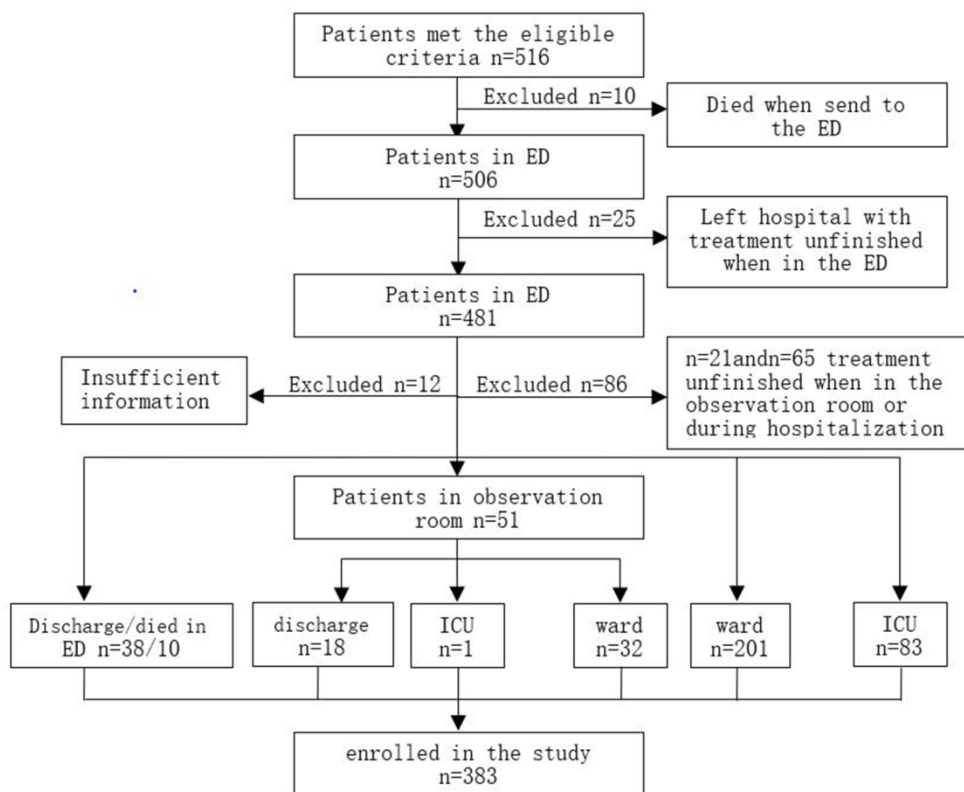

**Figure 1** The flow chart of study procedure

Figure

149x137mm (300 x 300 DPI)

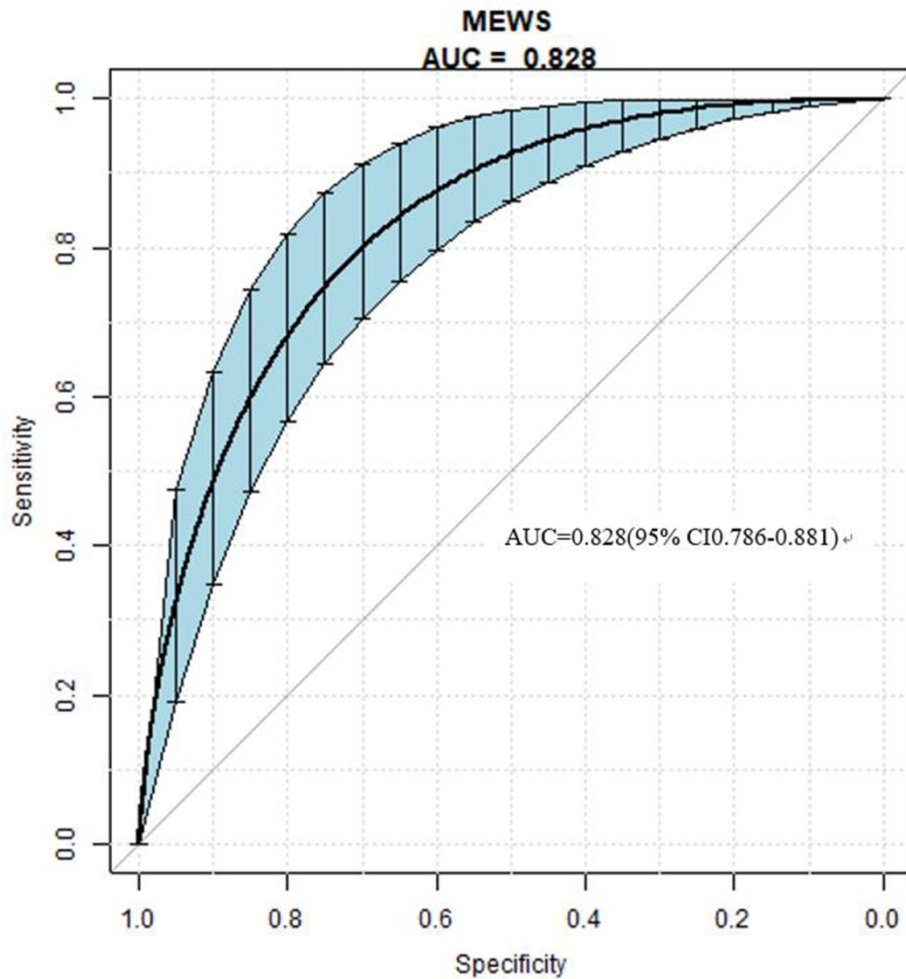

Figure 2 The AUC value of MEWS for predicting the in-hospital mortality.

Blue shading shows the bootstrap estimated 95% CI with the AUC.

Figure

128x146mm (300 x 300 DPI)

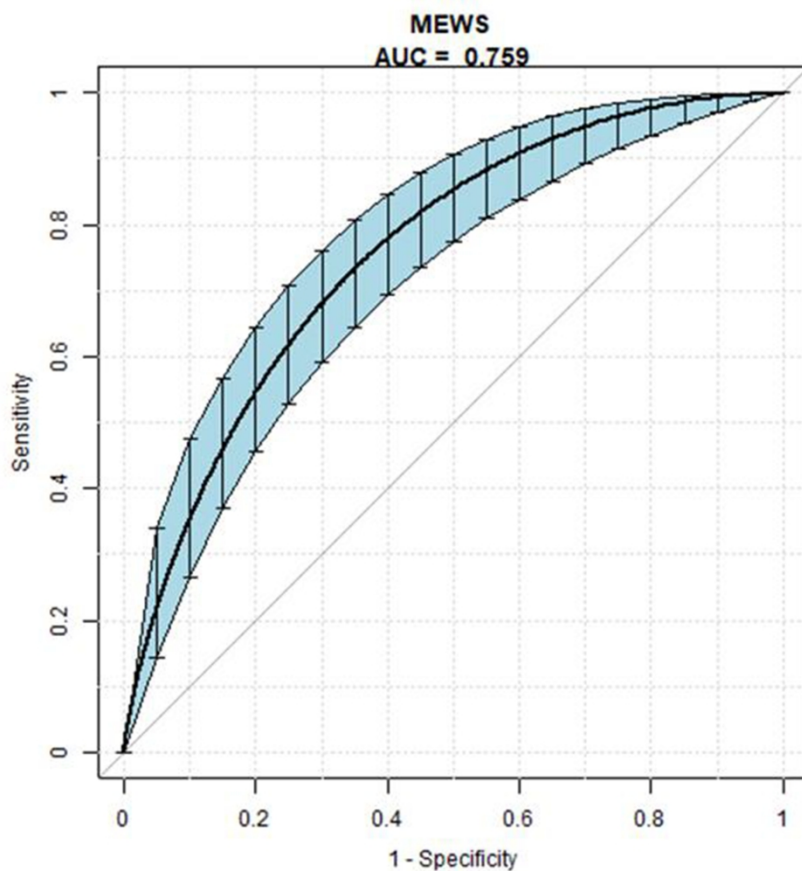

35 **Figure 3** The AUC value of MEWS for predicting admission to Intensive Care Unit  
36 Blue shading shows the bootstrap estimated 95% CI with AUC.

37  
38 Figure 3

39 181x178mm (300 x 300 DPI)



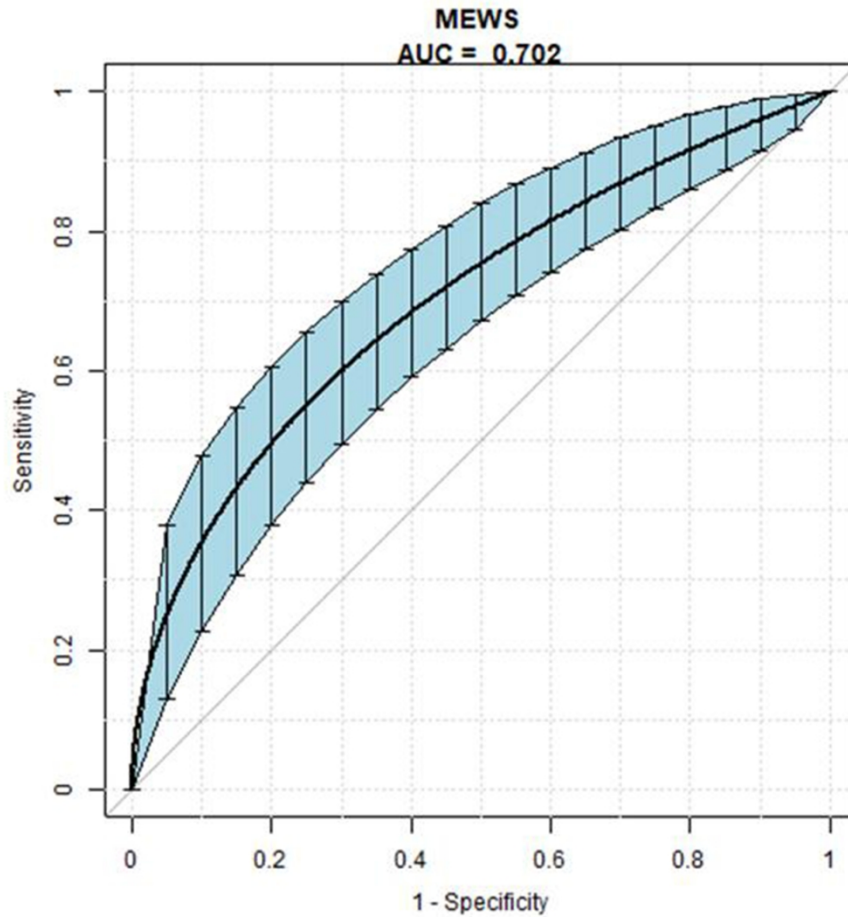

**Figure 4** The AUC value of MEWS for predicting hospitalised and discharged patients  
Blue shading shows the bootstrap estimated 95% CI with AUC.

Figure 4

171x178mm (300 x 300 DPI)

**Appendix 1** The Modified Early Warning Score

| Parameters                     | 3   | 2     | 1      | 0       | 1                 | 2                | 3            |
|--------------------------------|-----|-------|--------|---------|-------------------|------------------|--------------|
| Respiratory rate (bpm)         | —   | <9    | —      | 9-14    | 15-20             | 21-29            | ≥30          |
| Heart rate (bpm)               | —   | <40   | 41-50  | 51-100  | 101-111           | 112-129          | ≥130         |
| Systolic blood pressure (mmHg) | <70 | 71-80 | 81-100 | 101-199 | —                 | ≥200             | —            |
| AVPU score                     | —   | —     | —      | Alert   | Reacting to voice | Reacting to pain | Unresponsive |
| Temperature (°C)               | —   | <35.0 | —      | 35-38.4 | —                 | ≥38.5            | —            |

AVPU, A: alert, V: Reacting to voice, P: Reacting to pain, U: unresponsive; bpm, beats or breaths per minute.

**STROBE 2007 (v4) Statement—Checklist of items that should be included in reports of *observational studies***

| Section/Topic             | Item # | Recommendation                                                                                                                                                                       | Reported on page # |
|---------------------------|--------|--------------------------------------------------------------------------------------------------------------------------------------------------------------------------------------|--------------------|
| Title and abstract        | 1      | (a) Indicate the study’s design with a commonly used term in the title or the abstract                                                                                               | P1-2               |
|                           |        | (b) Provide in the abstract an informative and balanced summary of what was done and what was found                                                                                  | P2-3               |
| <b>Introduction</b>       |        |                                                                                                                                                                                      |                    |
| Background/rationale      | 2      | Explain the scientific background and rationale for the investigation being reported                                                                                                 | P5-6               |
| Objectives                | 3      | State specific objectives, including any prespecified hypotheses                                                                                                                     | P6                 |
| <b>Methods</b>            |        |                                                                                                                                                                                      |                    |
| Study design              | 4      | Present key elements of study design early in the paper                                                                                                                              | P7                 |
| Setting                   | 5      | Describe the setting, locations, and relevant dates, including periods of recruitment, exposure, follow-up, and data collection                                                      | P8                 |
| Participants              | 6      | (a) Give the eligibility criteria, and the sources and methods of selection of participants                                                                                          | P7                 |
| Variables                 | 7      | Clearly define all outcomes, exposures, predictors, potential confounders, and effect modifiers. Give diagnostic criteria, if applicable                                             | P9                 |
| Data sources/ measurement | 8*     | For each variable of interest, give sources of data and details of methods of assessment (measurement). Describe comparability of assessment methods if there is more than one group | P8-9               |
| Bias                      | 9      | Describe any efforts to address potential sources of bias                                                                                                                            | P10                |
| Study size                | 10     | Explain how the study size was arrived at                                                                                                                                            | P7                 |
| Quantitative variables    | 11     | Explain how quantitative variables were handled in the analyses. If applicable, describe which groupings were chosen and why                                                         | P8-9               |
| Statistical methods       | 12     | (a) Describe all statistical methods, including those used to control for confounding                                                                                                | P9-10              |
|                           |        | (b) Describe any methods used to examine subgroups and interactions                                                                                                                  | P9-10              |
|                           |        | (c) Explain how missing data were addressed                                                                                                                                          | P9-10              |
|                           |        | (d) If applicable, describe analytical methods taking account of sampling strategy                                                                                                   | P9-10              |
|                           |        | (e) Describe any sensitivity analyses                                                                                                                                                | P9-10              |
| <b>Results</b>            |        |                                                                                                                                                                                      |                    |

|                          |     |                                                                                                                                                                                                              |              |
|--------------------------|-----|--------------------------------------------------------------------------------------------------------------------------------------------------------------------------------------------------------------|--------------|
| Participants             | 13* | (a) Report numbers of individuals at each stage of study—eg numbers potentially eligible, examined for eligibility, confirmed eligible, included in the study, completing follow-up, and analysed            | P7           |
|                          |     | (b) Give reasons for non-participation at each stage                                                                                                                                                         | P25-Figure1  |
|                          |     | (c) Consider use of a flow diagram                                                                                                                                                                           | P25-Figure 1 |
| Descriptive data         | 14* | (a) Give characteristics of study participants (eg demographic, clinical, social) and information on exposures and potential confounders                                                                     | P21-Table 1  |
|                          |     | (b) Indicate number of participants with missing data for each variable of interest                                                                                                                          | P10          |
| Outcome data             | 15* | Report numbers of outcome events or summary measures                                                                                                                                                         | P10-11       |
| Main results             | 16  | (a) Give unadjusted estimates and, if applicable, confounder-adjusted estimates and their precision (eg, 95% confidence interval). Make clear which confounders were adjusted for and why they were included | P10-11       |
|                          |     | (b) Report category boundaries when continuous variables were categorized                                                                                                                                    | P10-11       |
|                          |     | (c) If relevant, consider translating estimates of relative risk into absolute risk for a meaningful time period                                                                                             | P10-11       |
| Other analyses           | 17  | Report other analyses done—eg analyses of subgroups and interactions, and sensitivity analyses                                                                                                               | P10-11       |
| <b>Discussion</b>        |     |                                                                                                                                                                                                              |              |
| Key results              | 18  | Summarise key results with reference to study objectives                                                                                                                                                     | P12-13       |
| Limitations              | 19  | Discuss limitations of the study, taking into account sources of potential bias or imprecision. Discuss both direction and magnitude of any potential bias                                                   | P14          |
| Interpretation           | 20  | Give a cautious overall interpretation of results considering objectives, limitations, multiplicity of analyses, results from similar studies, and other relevant evidence                                   | P12-13       |
| Generalisability         | 21  | Discuss the generalisability (external validity) of the study results                                                                                                                                        | P12-13       |
| <b>Other information</b> |     |                                                                                                                                                                                                              |              |
| Funding                  | 22  | Give the source of funding and the role of the funders for the present study and, if applicable, for the original study on which the present article is based                                                | P16          |

\*Give information separately for cases and controls in case-control studies and, if applicable, for exposed and unexposed groups in cohort and cross-sectional studies.

**Note:** An Explanation and Elaboration article discusses each checklist item and gives methodological background and published examples of transparent reporting. The STROBE checklist is best used in conjunction with this article (freely available on the Web sites of PLoS Medicine at <http://www.plosmedicine.org/>, Annals of Internal Medicine at <http://www.annals.org/>, and Epidemiology at <http://www.epidem.com/>). Information on the STROBE Initiative is available at [www.strobe-statement.org](http://www.strobe-statement.org).

# BMJ Open

## Prognostic value of Modified Early Warning Score generated in a Chinese emergency department: A prospective cohort study

|                                 |                                                                                                                                                                                                                                                                                                                                                                                                                                                                                                                                                                                                                                             |
|---------------------------------|---------------------------------------------------------------------------------------------------------------------------------------------------------------------------------------------------------------------------------------------------------------------------------------------------------------------------------------------------------------------------------------------------------------------------------------------------------------------------------------------------------------------------------------------------------------------------------------------------------------------------------------------|
| Journal:                        | <i>BMJ Open</i>                                                                                                                                                                                                                                                                                                                                                                                                                                                                                                                                                                                                                             |
| Manuscript ID                   | bmjopen-2018-024120.R2                                                                                                                                                                                                                                                                                                                                                                                                                                                                                                                                                                                                                      |
| Article Type:                   | Research                                                                                                                                                                                                                                                                                                                                                                                                                                                                                                                                                                                                                                    |
| Date Submitted by the Author:   | 20-Sep-2018                                                                                                                                                                                                                                                                                                                                                                                                                                                                                                                                                                                                                                 |
| Complete List of Authors:       | Xie, Xiaohua; The Second People's Hospital of Shenzhen<br>Huang, Wenlong ; The People's Hospital of Longhua<br>Liu, Qiongling ; Guangdong Medical University, School of Nursing<br>Tan, Wei ; The Second People's Hospital of Shenzhen, Emergency Department<br>Pan, Lu ; The Second People's Hospital of Shenzhen<br>Wang, Lei ; Guangzhou Medical University, School of Nursing<br>Zhang, Jian ; Guangzhou Medical University, School of Nursing<br>Wang, Yunyun ; Anhui Medical University, School of Nursing<br>Zeng, Y; The Third Affiliated Hospital of Guangzhou Medical University, Research Institute of Gynecology and Obstetrics |
| <b>Primary Subject Heading</b>: | Nursing                                                                                                                                                                                                                                                                                                                                                                                                                                                                                                                                                                                                                                     |
| Secondary Subject Heading:      | Emergency medicine, Health services research                                                                                                                                                                                                                                                                                                                                                                                                                                                                                                                                                                                                |
| Keywords:                       | ("Modified Early Warning Score") OR "MEWS", ("Emergency") AND "triage", Emergency department                                                                                                                                                                                                                                                                                                                                                                                                                                                                                                                                                |
|                                 |                                                                                                                                                                                                                                                                                                                                                                                                                                                                                                                                                                                                                                             |

SCHOLARONE™  
Manuscripts

**Title: Prognostic value of Modified Early Warning Score generated in a Chinese emergency department: A prospective cohort study**

Xiaohua Xie,<sup>1</sup> Wenlong Huang,<sup>2</sup> Qionglin Liu,<sup>3</sup> Wei Tan,<sup>4</sup> Lu Pan,<sup>5</sup> Lei Wang,<sup>6</sup> Jian Zhang,<sup>6</sup>  
Yunyun Wang,<sup>7</sup> Yingchun Zeng<sup>8</sup>

<sup>1</sup>Department of Nursing, The Second People's Hospital of Shenzhen, The First Affiliated Hospital of Shenzhen University, Shenzhen, China

<sup>2</sup>Department of Nursing, The People's Hospital of Longhua, Shenzhen, China

<sup>3</sup>School of Nursing, Guangdong Medical University, Dongguan, China

<sup>4</sup>Emergency Department, The Second People's Hospital of Shenzhen, The First Affiliated Hospital of Shenzhen University, Shenzhen, China

<sup>5</sup>Department of Intensive Care Unit, The Second People's Hospital of Shenzhen, The First Affiliated Hospital of Shenzhen University, Shenzhen, China

<sup>6</sup>School of Nursing, Guangzhou Medical University, Guangzhou, China

<sup>7</sup>School of Nursing, Anhui Medical University, Hefei, China

<sup>8</sup>Research Institute of Gynecology and Obstetrics, The Third Affiliated Hospital of Guangzhou Medical University, Guangzhou, China

**Corresponding author:**

Yingchun Zeng

Research Institute of Gynecology and Obstetrics,

The Third Affiliated Hospital of Guangzhou Medical University,

Guangzhou,

China 510150

Tel: +86-2081292216

Email: [chloezengyc@hotmail.co.uk](mailto:chloezengyc@hotmail.co.uk)

## ABSTRACT

**Objectives** This study aimed to validate the performance of the Modified Early Warning Score (MEWS) in a Chinese emergency department, and to determine the best cut-off value for in-hospital mortality prediction.

**Design** A prospective, single-centred observational cohort study.

**Setting** This study was conducted at a tertiary hospital in South China.

**Participants** A total of 383 patients, ages 18 years or older who presented to the emergency department from May 17, 2017 until September 27, 2017, triaged as Category 1, 2, or 3, were enrolled.

**Outcomes** The primary outcome was a composite of in-hospital mortality and admission to the intensive care unit. The secondary outcome was using MEWS to predict hospitalised and discharged patients.

**Results** A total of 383 patients were included in this study. In-hospital mortality was 13.6% (52/383), and transfer to the ICU was 21.7 % (83/383). The area under the ROC curve of MEWS for in-hospital mortality prediction was 0.83 (95% CI: 0.786, 0.881). When the cut-off point was defined as 3.5, 158 patients had MEWS>3.5, with a specificity of 66%, a sensitivity of 87%, an accuracy of 69%, a positive predictive value of 28%, and a negative predictive value of 97%, respectively, when predicting in-hospital mortality.

**Conclusion** Our findings support the use of MEWS for in-hospital mortality prediction in patients who were triaged Category 1, 2, or 3 in a Chinese emergency department. The cut-off

1  
2  
3 value for in-hospital mortality prediction defined in this study was different from that seen in  
4  
5 many other studies.  
6  
7

8 **Keywords:** Modified Early Warning Score; triage; in-hospital mortality; Emergency department  
9  
10  
11  
12  
13  
14  
15  
16  
17  
18  
19  
20  
21  
22  
23  
24  
25  
26  
27  
28  
29  
30  
31  
32  
33  
34  
35  
36  
37  
38  
39  
40  
41  
42  
43  
44  
45  
46  
47  
48  
49  
50  
51  
52  
53  
54  
55  
56  
57  
58  
59  
60

For peer review only



### Study strengths and limitations

- This prospective observational study was carried out according to workflow, which is most cost-effective and reduces difficulty in data collection.
- This study used a prospective study design and provided a new cut-off point for the MEWS using ROC curve analysis to increase sensitivity in predicting in-hospital mortality.
- This study evaluated the MEWS only once, on patient admission, so dynamic changes in the score could not be observed during patient hospitalisation.
- This prospective cohort study recruited participants at a single medical centre, which could limit the generalisability of the study findings.

## INTRODUCTION

Different kinds of triage systems have been developed around the world to assess the illness severity of patients presenting to emergency departments (ED) who are assigned treatment priorities.<sup>1,2</sup> In China, there is a lack of a unified triage standard used to ? arrange patients when they present to the emergency department.<sup>3</sup> The triage standard used in hospitals in Shenzhen is a new four-level Chinese emergency triage criteria, published by the Public Hospital Administration of Shenzhen Municipality in August, 2013.<sup>3</sup> It categorises patients as near death (Level 1), critically ill (Level 2), acute (Level 3) and not acute (Level 4), requiring treatment immediately, in 10 minutes, in 30 minutes, and in four hours, respectively. This is mainly decided according to patients' presenting complaints and questions about potentially aggravating factors. According to acuity, Level 1, Level 2, and Level 3 are urgent patients with a higher risk of serious adverse events, such as hospital admission and mortality, compared to Level 4, which describes non-urgent patients.<sup>4,5</sup>

Therefore, an excellent scoring system is urgently required for mortality predictions in patients admitted to the ED. Today, there are a number of scoring systems designed to detect deteriorating patients to predict the chances of hospitalisation, intensive care unit (ICU) admission, or in-hospital mortality in emergency department ED patients.<sup>6,7</sup> The VitalPac Early Warning Score (VIEWS), modified early warning score (MEWS), Rapid Emergency Medicine Score (REMS), Emergency Department Sepsis Score (MEDS), and Rapid Acute Physiology Score are the most commonly employed systems for bedside evaluation.<sup>8-11</sup>

MEWS was introduced in 2001 by UK professor Subbe,<sup>12</sup> who modified it from the Early Warning Score (EWS). The MEWS is a simple physiological scoring system, which includes

1  
2  
3 five physiological parameters that can easily be collected at the moment of presentation: systolic  
4 blood pressure, pulse rate, respiratory rate, temperature, and level of consciousness. The MEWS  
5 is widely used in wards, the ICU and emergency departments to detect the clinical deterioration  
6 of patients or to predict clinical outcomes.<sup>6,7,13</sup>  
7  
8  
9  
10  
11  
12

13 A large number of studies have reported that MEWS is an effective tool for in-hospital  
14 mortality prediction.<sup>14-17</sup> However, there have also been studies conducted on different  
15 populations or in different areas reporting that MEWS is not an adequate scoring system for  
16 predicting in-hospital mortality.<sup>18,19</sup> Moreover, the MEWS cut-off value (for in-hospital mortality  
17 prediction reported in studies) varied.<sup>9,10,15,20-22</sup> A study conducted on 518 patients in ICU  
18 indicated that patients with  $MEWS \geq 6$  had significantly higher mortality than those with a  
19  $MEWS < 6$ .<sup>22</sup> However, another study on the performance of MEWS in non-traumatic critical  
20 patients in an emergency department showed the MEWS cut-off value was 3.<sup>15</sup> Therefore, this  
21 study hypothesises that MEWS performance and the cut-off value may differ according to the  
22 specific population.  
23  
24  
25  
26  
27  
28  
29  
30  
31  
32  
33  
34  
35  
36

37 The MEWS is also used to evaluate patient conditions in Chinese emergency departments,  
38 including focusing on the relationship between factors and clinical outcomes, using pre-hospital  
39 MEWS to identify non-trauma patients requiring life-saving intervention, and risk stratification  
40 of patients before inter-facility transport.<sup>23-25</sup> However, information is limited on MEWS  
41 validation for in-hospital mortality predictions in patients triaged as Level 1, 2, or 3 in Chinese  
42 emergency departments. Hence, the aim of this study was to evaluate MEWS performance in  
43 predicting in-hospital mortality of the population in a Chinese emergency treatment room, and to  
44 find the best cut-off value.  
45  
46  
47  
48  
49  
50  
51  
52  
53  
54  
55  
56  
57  
58  
59  
60

## METHODS

### Study design

A prospective, single-centred observational cohort study was conducted in the ED of a tertiary hospital in Shenzhen, China to evaluate the ability of the MEWS to predict in-hospital mortality in patients presenting to the emergency treatment room, who were categorised Levels 1, 2, or 3.

The study was approved by the hospital ethics committee.

### Study population

The study was carried out at the tertiary hospital, which is the First Affiliated Hospital of Shenzhen University with 173,000 ED presentations in 2017. Of 173,000 ED presentations, approximately 6,600 patients were admitted to the emergency treatment room. Data of patients presenting to the emergency treatment room between May 17, 2017 and September 27, 2017 were collected. Eligibility criteria: patients ages 18 years or older triaged as Category 1, 2, and 3 were included in the study. Exclusion criteria: Patients who had died prior to arrival in the ED, and patients who needed ward admission, ICU admission, or rescue according to the doctor's judgment, or who ignored the doctor's advice and left the hospital due to a variety of reasons, were excluded from the study. Patients with insufficient information were also excluded.

### Sample size calculation

This study calculated sample size using G\*Power 3.1.9.2 (<http://www.softpedia.com/get/Science-CAD/G-Power.shtml>). The estimated sample size was 319 with an accuracy index of 0.95, a marginal error of 0.05 with 95% confidence level and 80% power.

## Participant involvement and data collection

Patients who presented to our ED were evaluated and triaged by the triage nurse, who had more than five years of experience. Patients were triaged to near death (Level 1), critically ill (Level 2), acute (Level 3) and not acute (Level 4). This is decided according to the triage guidelines and the judgment of the triage nurse. According to acuity, patients triaged to Level 1 and Level 2 were sent to the emergency treatment room; patients triaged to Level 3 were given priority in the consulting room or sent to the emergency treatment room if the triage nurse judged the patient's condition to be serious; and patients triaged to Level 4 were sent to wait outside the consulting room.

Physiological parameters were measured by nurses and researchers at the time of admittance to the emergency treatment room. Respiratory rate was counted manually for more than a full minute; heart rate and blood pressure were measured using an automatic electronic sphygmomanometer (HBP-9020) or multifunctional ECG monitor (PHILIPS Jin Kewei, G30). Body temperature was measured using an infrared ear thermometer (Pr04000). The level of consciousness was recorded as the best response to the AVPU score (A for alert, V for reacting to vocal stimulus, P for reacting to pain and U for unresponsive).

Patient information was recorded using a questionnaire designed by the researchers. The following information was included: age, gender, nationality, educational background, 'mode of transportation' to hospital, disease type, main diagnosis, body temperature, systolic blood pressure, diastolic blood pressure, pulse rate, respiratory rate, peripheral oxygen saturation, and the AVPU (A: alert, V: voice, P: pain, and U: unresponsive) score, triage level, MEWS score (Appendix 1), and mortality.

1  
2  
3 The patients were followed up by the researcher until discharge, death, or for a maximum of 90  
4 days. The researchers calculated the MEWS using patients' recorded five physiological  
5 parameters. In-hospital mortality was the main outcome. The predictive accuracy of the MEWS  
6 was evaluated by the Receiver Operating Characteristic (ROC) curve. Sensitivity, specificity,  
7 accuracy, and positive and negative predictive value (PPV and NPV) were analysed to indicate  
8 the predictive power of the scoring system. The patients were divided into two groups: MEWS <  
9 4 and MEWS  $\geq$  4. The intergroup differences in the baseline characteristic physiological  
10 parameters and the scores between the two groups were also evaluated.  
11  
12  
13  
14  
15  
16  
17  
18  
19  
20  
21  
22

### 23 **Outcomes**

24  
25  
26 The primary outcome was a composite of in-hospital mortality and admission to the ICU. The  
27 secondary outcome of this study was using MEWS for prediction whether admitted to general  
28 ward unit or discharged from hospital.  
29  
30  
31  
32  
33

### 34 **Ethics statement**

35  
36  
37 This study was approved by the medical ethical committee of the Second People's Hospital of  
38 Shenzhen (No. 20141201005). Written informed consent was obtained from research participants  
39 or patients' legal agents.  
40  
41  
42  
43

### 44 **Statistical analysis**

45  
46  
47 Descriptive statistics were tabulated for the overall sample. Mean and standard deviation were  
48 calculated for continuous variables, and frequencies and percentages for all other categorical  
49 variables. Data distribution of each variable between the MEWS <4 and the MEWS  $\geq$ 4 groups  
50 was compared. In addition, the area under the receiver operating characteristic curve (AUC) was  
51  
52  
53  
54  
55  
56  
57  
58  
59  
60

1  
2  
3 measured to evaluate the predictive ability of the MEWS. Finally, sensitivity, specificity,  
4 accuracy, positive and negative predictive values (PPV and NPV) were also analysed.  
5  
6 Regression analysis was used to address confounding variables of age and gender.  $P < 0.05$  was  
7  
8 regarded as statistically significant. EPidata 3.1 was used for data entry, and then exported to tab-  
9  
10 delimited text files. All analyses were performed using R (<http://www.R-project.org>) and  
11  
12 EmpowerStats software ([www.empowerstats.com](http://www.empowerstats.com), X&Y solutions, Inc. Boston MA).  
13  
14  
15  
16  
17  
18  
19  
20

## 21 RESULTS

22  
23  
24 A total of 516 patients met the eligibility criteria, with 133 patients excluded. Among the patients  
25  
26 who were excluded from the study, 10 had already died when they were sent to the ED, while 46  
27  
28 patients in the ED ignored the advice of doctors and left the hospital due to a variety of reasons,  
29  
30 and 65 patients also left the hospital after being admitted to the ward or ICU. Twelve patients  
31  
32 were excluded due to insufficient information (Figure 1). Finally, 383 patients were enrolled in  
33  
34 the study. Of that total, 255 (66.6%) patients were male; the mean age of all patients was  
35  
36  $59.6 \pm 18.3$  years, and the ethnicity of the majority of patients was Han (98.2%). Among the 383  
37  
38 patients, 52.5% and 21.7% were admitted to the ward and ICU from the ED, respectively.  
39  
40 Nervous system, cardiovascular, and respiratory diseases were the three most common disease  
41  
42 types seen in these patients, consisting of more than half of the population. In the baseline  
43  
44 characteristics between groups  $MEWS < 4$  and  $MEWS \geq 4$ , a number of baseline characteristics  
45  
46 showed significant differences, with  $P < 0.05$ . Detailed patient baseline characteristics are shown  
47  
48  
49  
50  
51 in Table 1.  
52  
53  
54  
55  
56  
57  
58  
59  
60

1  
2  
3 The patients were divided into two groups: MEWS  $\geq 4$  and MEWS  $< 4$ . Physiological parameters  
4 include body temperature, systolic blood pressure, diastolic blood pressure, heart rate, respiratory  
5 rate, percutaneous oxygen saturation and mental status, which were different between the two  
6 groups, and the difference was statistically significant. However, between the two groups, there  
7 were no differences in terms of blood sugar and length of stay. In addition, a total of 277  
8 critically ill patients were triaged as Level 1 and Level 2, requiring treatment within 10 minutes.  
9  
10 There were more critically ill patients in the MEWS  $\geq 4$  group than in the MEWS  $< 4$  group  
11 (150/158 VS. 127/225,  $P < 0.001$ ). The proportion of in-hospital mortality was 13.6% (52/383),  
12 and most were in the MEWS  $\geq 4$  group (7/52 versus 45/52,  $P < 0.001$ ). Detailed physiological  
13 parameters of the two groups are indicated in Table 2.  
14  
15  
16  
17  
18  
19  
20  
21  
22  
23  
24  
25  
26  
27

28 The MEWS in-hospital mortality predictive ability is shown by area under the Receiver  
29 Operating Characteristic curve (AUC), at 0.83 (95% CI, 0.786-0.881) (Figure 2). Logistic  
30 regression analysis was used to examine the association between MEWS and the primary and  
31 secondary outcome measures. As seen in Table 3, the MEWS was significantly associated with  
32 in-hospital mortality (odds ratios-OR, 1.65; 95% CI, 1.44-1.89;  $P < 0.001$ ), admission to ICU  
33 (OR, 1.54; 95% CI, 1.39-1.72,  $P < 0.001$ ), and predicting admission to general ward unit or  
34 discharge from hospital (OR, 1.55; 95% CI, 1.28-1.89,  $P < 0.001$ ) (Table 3). The MEWS in-  
35 hospital mortality, admission to ICU predictive ability and predicting ability of admission to  
36 general ward unit or discharge from hospital are shown in Figure 2, Figure 3, and Figure 4,  
37 respectively.  
38  
39  
40  
41  
42  
43  
44  
45  
46  
47  
48  
49  
50  
51  
52  
53  
54  
55  
56  
57  
58  
59  
60



## DISCUSSION

In this observational cohort study, the MEWS showed good performance for in-hospital mortality prediction with AUC values at 0.83. The higher the score, the higher the ratio of in-hospital mortality, indicating that MEWS was significantly correlated with patient mortality. In patients with MEWS  $\geq 4$ , compared with MEWS  $< 4$ , a number of variables, such as age, triage level, vital signs, means of arrival and disease type are influencing factors of death in ED patients. The study demonstrated that MEWS is an effective tool for in-hospital mortality prediction for ED patients who triage to Levels 1, 2, and 3.

MEWS is a widely used scoring system in many countries, but differences between these studies, including study setting, population and disease types, has led to different predictive ability of the MEWS. The AUC, specificity and sensitivity were the most common indexes reported in studies on MEWS performance.<sup>17,20,26,27</sup> A large proportion of studies reported that MEWS was an effective tool for mortality prediction, with AUC ranging from approximately 0.70-0.89 for the most frequently used threshold (MEWS=5), with the specificity and sensitivity reported in those studies ranging from 0.67-0.72, 0.65-0.71, respectively.<sup>9,17,20,26</sup> However, less information was provided on the accuracy, positive predictive value and negative predictive value of the score. In a single-centre observational cohort study conducted at an urban tertiary care medical centre in Chicago, adult patients who were suspected of contracting an infection in a hospital ward or emergency department (ED) were included.<sup>20</sup> Discrimination for in-hospital mortality was moderate with MEWS AUC 0.73 (95% CI, 0.71-0.74).

Furthermore, there are also studies demonstrating that MEWS is not an efficient system for mortality prediction with an approximate AUC of less than 0.6, with study populations that

1  
2  
3 included septic patients admitted to medical wards, surgical patients presenting to emergency  
4 departments, and adults admitted to medical wards, respectively.<sup>9,17,22</sup> It showed that disease and  
5 population differences seem to strongly determine MEWS performance. However, MEWS  
6 performance in ED patients who were triaged as Level 1, 2, or 3 had not previously been  
7 validated. Our study found that mortality prediction for the MEWS is good (AUC, 0.83; 95% CI,  
8 0.79-0.88).  
9

10  
11  
12 When combined with sensitivity and specificity, the maximum was defined as the best threshold.  
13  
14 In order to increase the proportion of in-hospital mortality prediction and reduce missed  
15 diagnoses, sensitivity is more important than specificity in this study. When the threshold was 4,  
16 the specificity, accuracy, and NPV improved at the cost of sensitivity and PPV, and the number  
17 of deaths due to missed diagnosis increased from 6 to 16. Hence, this study defined the MEWS  
18 cut-off point as 4, which was different from a previous prospective study, whose MEWS cut-off  
19 point was defined as 3.<sup>15</sup> However, the MEWS cut-off point defined as 3 in this study was  
20 different from that of many other studies, whose MEWS cut-off point was defined as 5 or  
21 higher.<sup>10,20-22</sup> For the baseline characteristics of patients in this study, respiratory system diseases,  
22 digestive system diseases, circulatory system diseases, and nervous system diseases were found  
23 in 70.7% of the population and 67.3% of non-survivors, with the median (IQR) MEWS at 3 (3).  
24  
25 Different kinds of diseases and populations may have contributed to the difference. In general,  
26 our study provides evidence that the MEWS is an efficient system for in-hospital mortality  
27 prediction in an ED.  
28  
29  
30  
31  
32  
33  
34  
35  
36  
37  
38  
39  
40  
41  
42  
43  
44  
45  
46  
47  
48  
49  
50  
51  
52  
53  
54  
55  
56  
57  
58  
59  
60

### Limitations and implications for future research

There are several limitations in our study. First, this was a single-centre observational cohort study at a tertiary hospital in Shenzhen. Patient outcomes may have been affected by the level of care provided by the hospital, and may therefore have also affected the performance of the Modified Early Warning Score for in-hospital mortality prediction. Second, the population included in this study was selected according to triage criteria that were only published in Shenzhen. Therefore, our study results may not be generalisable to other settings. Third, we evaluated the MEWS only once, on patient admission. Dynamic changes in the score could not be observed during patient hospitalisation. Hence, we could not exclude the possibility that re-evaluation of this clinical score during hospitalisation may have improved or reduced the MEWS performance in this setting. In future, a multicentre study should be conducted to reduce the effect of the sample size not being representative. On the contrary, due to the varied performance of MEWS in different studies, research on specific diseases is also required, in order for the use of MEWS to be more accurate. While the actual number of enrolled subjects was 383 (higher than the required sample size of 319), there were 133 patients excluded in the analysis due to missing data resulting in potential selection bias. Thus, future research should implement strategies to minimise missing data on patient report forms.

## CONCLUSION

This study found that MEWS was an accurate score for predicting in-hospital mortality and admission to ICU in a Chinese emergency department. Future multi-centric prospective cohort studies are needed to validate the study findings. As patients with MEWS equal or higher than 4 had higher rates of in-hospital mortality and admission to ICU, calculating MEWS may be an important indicator for closely monitoring patients, requesting immediately contacting doctor-in-charge, and establishing a rapid response intervention team. In this studied hospital, the triage system in the ED has already added MEWS as one of vital parameter monitors, and designed an algorithm in the triage system which can calculate MEWS automatically.

1  
2  
3 **Acknowledgments** We sincerely thank Xinglin Chen for her excellent assistance with the  
4 statistical analyses. We also thank all patients for participating in this study.  
5  
6  
7

8 **Contributorship statement** Study design: XX, WH and QL; data acquisition: WH; data analysis  
9 and interpretation: WH, LP, LW, JZ, YW and YZ; project administration: XX and WT;  
10 manuscript first draft: XX and WH; statistical analysis: WH; manuscript revision: YZ.  
11  
12  
13  
14  
15

16 **Funding** This work was supported by the Science and Technology Department of Guangdong  
17 Province, China. Grant number (2014A020212574).  
18  
19  
20

21 **Competing interests** None declared.  
22  
23

24 **Ethical approval** The study was approved by the ethical committee of the Second People's  
25 Hospital of Shenzhen.  
26  
27  
28  
29

30 **Provenance and peer review** Not commissioned; externally peer reviewed.  
31  
32

33 **Data sharing statement** We are glad to share data collected in this study upon request from the  
34 corresponding author.  
35  
36  
37  
38

39 **Open Access** This is an Open Access article distributed in accordance with the Creative  
40 Commons Attribution Non Commercial (CC BY-NC 4.0) license, which permits others to  
41 distribute, remix, adapt, build upon this work non-commercially, and license their derivative  
42 works on different terms, provided the original work is properly cited and the use is non-  
43 commercial. See: <http://creativecommons.org/licenses/by-nc/4.0/>.  
44  
45  
46  
47  
48  
49  
50  
51  
52  
53  
54  
55  
56  
57  
58  
59  
60

## References

1. Krey J. Triage in emergency departments. Comparative evaluation of 4 international triage systems. *Med Klin Intensivmed Notfmed* 2016;111(2):124-133. doi: 10.1007/s00063-015-0069-0. Epub 2015 Sep 11.
2. Chang W, Liu HE, Goopy S, *et al.* Using the Five-Level Taiwan Triage and Acuity Scale Computerized System: Factors in Decision Making by Emergency Department Triage Nurses. *Clin Nurs Res* 2017;26(5):651-666. doi: 10.1177/1054773816636360. Epub 2016 Mar 2.
3. Peng L, Hammad K. Current status of emergency department triage in mainland China: A narrative review of the literature. *Nurs Health Sci* 2015;17(2):148-158. doi: 10.1111/nhs.12159. Epub 2014 Sep 8.
4. Municipality PHAoS. The hospital emergency triage guidelines (Trial). 2013.
5. Yuksen C, Sawatmongkornkul S, Suttabuth S, *et al.* Emergency severity index compared with 4-level triage at the emergency department of Ramathibodi University Hospital. *Asian Biomedicine* 2016;10(2): 155 - 161. doi: 10.5372/1905-7415.1002.477.
6. Zachariasse JM, Seiger N, Rood PP, *et al.* Validity of the Manchester Triage System in emergency care: A prospective observational study. *PloS one* 2017;12(2):e0170811. doi: 10.1371/journal.pone.0170811. eCollection 2017.
7. Nannan Panday RS, Minderhoud TC, Alam N, *et al.* Prognostic value of early warning scores in the emergency department (ED) and acute medical unit (AMU): A narrative review. *Eur J Intern Med* 2017;45:20-31. doi: 10.1016/j.ejim.2017.09.027. Epub 2017 Oct 7.
8. Mapp ID, Davis LL, Krowchuk H. Prevention of unplanned intensive care unit admissions and hospital mortality by early warning systems. *Dimens Crit Care Nurs* 2013;32(6):300-309. doi: 10.1097/DCC.000000000000004.
9. Dundar ZD, Ergin M, Karamercan MA, *et al.* Modified Early Warning Score and VitalPac Early Warning Score in geriatric patients admitted to emergency department. *Eur J Emerg Med* 2016;23(6):406-412. doi: 10.1097/MEJ.0000000000000274.
10. Bulut M, Cebicci H, Sigirli D, *et al.* The comparison of modified early warning score with rapid emergency medicine score: a prospective multicentre observational cohort study on

- 1  
2  
3 medical and surgical patients presenting to emergency department. *Emerg Med J*  
4 2014;31(6):476-481. doi: 10.1136/emermed-2013-202444. Epub 2013 Apr 6.  
5  
6  
7 11. van Galen LS, Dijkstra CC, Ludikhuizen J, *et al.* A Protocolised Once a Day Modified Early  
8 Warning Score (MEWS) Measurement Is an Appropriate Screening Tool for Major Adverse  
9 Events in a General Hospital Population. *PLoS One* 2016;11(8):e0160811. doi:  
10 10.1371/journal.pone.0160811. eCollection 2016.  
11  
12  
13 12. Hung SK, Ng CJ, Kuo CF, *et al.* Comparison of the Mortality in Emergency Department  
14 Sepsis Score, Modified Early Warning Score, Rapid Emergency Medicine Score and Rapid  
15 Acute Physiology Score for predicting the outcomes of adult splenic abscess patients in the  
16 emergency department. *PloS one* 2017;12(11):e0187495. doi:  
17 10.1371/journal.pone.0187495. eCollection 2017.  
18  
19  
20 13. Subbe CP, Kruger M, Rutherford P, *et al.* Validation of a modified Early Warning Score in  
21 medical admissions. *QJM* 2001;94(10):521-526.  
22  
23  
24 14. Churpek MM, Yuen TC, Winslow C, *et al.* Differences in vital signs between elderly and  
25 nonelderly patients prior to ward cardiac arrest. *Crit Care Med* 2015;43(4):816. doi:  
26 10.1097/CCM.0000000000000818.  
27  
28  
29 15. Koksall O, Torun G, Ahun E, *et al.* The comparison of modified early warning score and  
30 Glasgow coma scale-age-systolic blood pressure scores in the assessment of nontraumatic  
31 critical patients in Emergency Department. *Niger J Clin Pract* 2016;19(6):761-765. doi:  
32 10.4103/1119-3077.178944.  
33  
34  
35 16. Delgado-Hurtado JJ, Berger A, Bansal AB. Emergency department Modified Early  
36 Warning Score association with admission, admission disposition, mortality, and length of  
37 stay. *J Community Hosp Intern Med Perspect* 2016;6(2):31456. doi:  
38 10.3402/jchimp.v6.31456. eCollection 2016.  
39  
40  
41 17. Churpek MM, Yuen TC, Winslow C, *et al.* Multicenter Development and Validation of a  
42 Risk Stratification Tool for Ward Patients. *Am J Respir Crit Care Med* 2014;190(6):649-655.  
43 doi: 10.1164/rccm.201406-1022OC.  
44  
45  
46 18. Tirota D, Gambacorta M, La Regina M, *et al.* Evaluation of the threshold value for the  
47 modified early warning score (MEWS) in medical septic patients: a secondary analysis of  
48 an Italian multicentric prospective cohort (SNOOPII study). *QJM* 2017;110(6):369-373. doi:  
49 10.1093/qjmed/hcw229.  
50  
51  
52  
53  
54  
55  
56  
57  
58  
59  
60

19. Ho le O, Li H, Shahidah N, *et al*, Hock Ong ME. Poor performance of the modified early warning score for predicting mortality in critically ill patients presenting to an emergency department. *World J Emerg Med* 2013;4(4):273-278. doi: 10.5847/wjem.j.1920-8642.2013.04.005.
20. Churpek MM, Snyder A, Han X, *et al*. Quick Sepsis-related Organ Failure Assessment, Systemic Inflammatory Response Syndrome, and Early Warning Scores for Detecting Clinical Deterioration in Infected Patients outside the Intensive Care Unit. *Am J Respir Crit Care Med* 2017;195(7):906. doi: 10.1164/rccm.201604-0854OC.
21. Kruisselbrink R, Kwizera A, Crowther M, *et al*. Modified Early Warning Score (MEWS) Identifies Critical Illness among Ward Patients in a Resource Restricted Setting in Kampala, Uganda: A Prospective Observational Study. *PloS one* 2016;11(3):e0151408. doi: 10.1371/journal.pone.0151408. eCollection 2016.
22. Reini K, Fredrikson M, Oscarsson A. The prognostic value of the Modified Early Warning Score in critically ill patients: a prospective, observational study. *Eur J Anaesthesiol* 2012;29(3):152-157. doi: 10.1097/EJA.0b013e32835032d8.
23. Gu M, Fu Y, Li C, *et al*. [The value of modified early warning score in predicting early mortality of critically ill patients admitted to emergency department]. *Zhonghua wei zhong bing ji jiu yi xue* 2015;27(8):687-690. doi: 10.3760/cma.j.issn.2095-4352.2015.08.014.
24. Leung SC, Leung LP, Fan KL, *et al*. Can prehospital Modified Early Warning Score identify non-trauma patients requiring life-saving intervention in the emergency department? *Emerg Med Australas* : EMA 2016;28(1):84-89. doi: 10.1111/1742-6723.12501. Epub 2015 Nov 25.
25. Lee LL, Yeung KL, Lo WY, *et al*. Evaluation of a simplified therapeutic intervention scoring system (TISS-28) and the modified early warning score (MEWS) in predicting physiological deterioration during inter-facility transport. *Resuscitation* 2008;76(1):47-51. DOI: 10.1016/j.resuscitation.2007.07.005
26. Eick C, Rizas KD, Grogabada P, *et al*. Autonomic Nervous System Activity as Risk Predictor in the Medical Emergency Department: A Prospective Cohort Study. *Crit Care Med* 2015;43(5):1079-1086. doi: 10.1097/CCM.0000000000000922.
27. Wheeler I, Price C, Sitch A, *et al*. Early warning scores generated in developed healthcare settings are not sufficient at predicting early mortality in Blantyre, Malawi: a prospective



1  
2  
3 cohort study. *PloS one* 2013;8(3):e59830. doi: 10.1371/journal.pone.0059830. Epub 2013  
4 Mar 29.  
5  
6  
7  
8  
9  
10  
11  
12  
13  
14  
15  
16  
17  
18  
19  
20  
21  
22  
23  
24  
25  
26  
27  
28  
29  
30  
31  
32  
33  
34  
35  
36  
37  
38  
39  
40  
41  
42  
43  
44  
45  
46  
47  
48  
49  
50  
51  
52  
53  
54  
55  
56  
57  
58  
59  
60

For peer review only

**Table 1** Baseline characteristics between groups MEWS<4 and MEWS≥4

| Characteristics            | All (n, %)<br>n=383 | MEWS<4<br>n=225 | MEWS≥4<br>n=158 | <i>P</i> value |
|----------------------------|---------------------|-----------------|-----------------|----------------|
| <b>Age (Mean, SD)</b>      | 59.6(18.3)          | 57.9(16.9)      | 62.1(19.9)      | 0.008          |
| <b>Gender</b>              |                     |                 |                 | 0.43           |
| Male                       | 255(66.6)           | 159 (70.7)      | 96 (60.8)       |                |
| Female                     | 128 (33.4)          | 66 (29.3)       | 62 (39.2)       |                |
| <b>Ethnicity</b>           |                     |                 |                 | 0.525          |
| Han                        | 376 (98.2)          | 222 (98.7)      | 154 (97.5)      |                |
| Hui                        | 1 (0.2)             | 0 (0.0)         | 1 (0.6)         |                |
| Manchu                     | 6 (1.6)             | 3 (1.3)         | 3 (1.9)         |                |
| <b>Means of arrival</b>    |                     |                 |                 | 0.009          |
| Walking                    | 123 (32.1)          | 86 (38.2)       | 37 (23.4)       |                |
| Wheelchair                 | 8 (2.1)             | 4 (1.8)         | 4 (2.5)         |                |
| Ambulance                  | 252 (66.8)          | 135 (60.0)      | 117 (74.1)      |                |
| <b>Triage</b>              |                     |                 |                 | <0.001         |
| Discharged from ED         | 38 (9.9)            | 31 (13.8)       | 7 (4.4)         |                |
| Observation room           | 51 (13.3)           | 39 (17.3)       | 12 (7.6)        |                |
| Ward admission             | 201 (52.5)          | 126 (56.0)      | 75 (47.5)       |                |
| ICU admission              | 83 (21.7)           | 28 (12.4)       | 55 (34.8)       |                |
| Died in ED                 | 10 (2.6)            | 1 (0.5)         | 9 (5.7)         |                |
| <b>Disease types</b>       |                     |                 |                 | 0.003          |
| Respiratory system         | 54 (14.1)           | 19 (8.4)        | 35 (22.2)       |                |
| Digestive system           | 36 (9.4)            | 23 (10.2)       | 13 (8.2)        |                |
| Cardiovascular system      | 82 (21.4)           | 50 (22.2)       | 32 (20.3)       |                |
| Nervous system             | 99 (25.8)           | 69 (30.7)       | 30 (19.0)       |                |
| Hematological system       | 3 (0.8)             | 3 (1.3)         | 0 (0.0)         |                |
| Endocrinologic, metabolism | 3 (0.8)             | 3 (1.3)         | 0 (0.0)         |                |
| Urinary system             | 15 (3.9)            | 7 (3.1)         | 8 (5.1)         |                |
| Trauma                     | 28 (7.3)            | 17 (7.56)       | 11 (7.0)        |                |
| Others                     | 63 (16.5)           | 34 (15.1)       | 29 (18.4)       |                |

Abbreviations: SD, standard deviation; ED, emergency department; ICU, intensive care unit.

**Table 2** Comparison of clinical parameters between patients MEWS <4 and MEWS $\geq$ 4

| Parameters                   | All (n, %)   | MEWS<4       | MEWS $\geq$ 4 | P value |
|------------------------------|--------------|--------------|---------------|---------|
|                              | n=383        | n=225        | n=158         |         |
| <b>Age</b> (Mean, SD)        | 59.6 (18.3)  | 57.9 (16.9)  | 62.1 (19.9)   | 0.008   |
| <b>Gender</b>                |              |              |               | 0.430   |
| Male                         | 255 (66.6)   | 159 (70.7)   | 96 (60.8)     |         |
| Female                       | 128 (33.4)   | 66 (29.3)    | 62 (39.2)     |         |
| <b>Physiology</b> (Mean, SD) |              |              |               |         |
| Temperature ( $^{\circ}$ C)  | 37.2 (1.0)   | 36.9 (0.6)   | 37.6 (1.2)    | <0.001  |
| SBP (mmHg)                   | 136.6 (33.6) | 140.9 (29.6) | 130.3 (37.9)  | 0.001   |
| DBP (mmHg)                   | 80.3 (21.1)  | 82.8 (18.4)  | 76.80 (24.0)  | 0.002   |
| Heart rate (bpm)             | 95.2 (30.8)  | 80.7 (15.4)  | 116.0 (35.0)  | <0.001  |
| Respiratory rate (bpm)       | 23.1 (6.3)   | 20.7 (3.0)   | 26.6 (7.9)    | <0.001  |
| SPO2 median (IQR)            | 99.0 (4)     | 99 (2)       | 98 (5)        | <0.001  |
| BS median (IQR)              | 8.0 (3.4)    | 8.0 (3.2)    | 8.2 (3.6)     | 0.461   |
| LOS median (IQR)             | 12 (11)      | 11 (9)       | 14 (14)       | 0.068   |
| <b>Mental status</b>         |              |              |               | <0.001  |
| Alert                        | 280 (73.1)   | 193 (85.8)   | 87 (55.1)     |         |
| Reacting to voice            | 39 (10.1)    | 21 (9.3)     | 18 (11.4)     |         |
| Reacting to pain             | 32 (8.4)     | 10 (4.4)     | 22 (13.9)     |         |
| Unresponsive                 | 32 (8.4)     | 1 (0.4)      | 31 (19.6)     |         |
| <b>Triage level</b>          |              |              |               | <0.001  |
| Level 1                      | 69 (18.0)    | 8 (3.6)      | 61 (38.6)     |         |
| Level 2                      | 208 (54.3)   | 119 (52.9)   | 89 (56.3)     |         |
| Level 3                      | 106 (27.7)   | 98 (43.6)    | 80 (5.1)      |         |
| <b>Survivors</b>             | 331 (86.4)   | 218 (96.9)   | 113 (71.5)    | <0.001  |
| <b>Non-survivors</b>         | 52 (13.6)    | 7 (3.1)      | 45 (28.5)     | <0.001  |

Abbreviations: SD, standard deviation; bpm, beats or breaths per minute; BS, blood sugar; DBP, diastolic blood pressure; IQR, interquartile range, LOS, length of stay, SBP, systolic blood pressure; SPO, percutaneous oxygen saturation.

**Table 3** Association of MEWS with in-hospital mortality, admission to ICU, and predicting admission to general ward unit or discharge from hospital

| MEWS                                                                 | Model 1 OR (95% CI)<br><i>P</i> | Model 2 OR (95% CI)<br><i>P</i> |
|----------------------------------------------------------------------|---------------------------------|---------------------------------|
| In-hospital mortality                                                | 1.66 (1.45, 1.90)<br><0.001     | 1.65 (1.44, 1.89)<br><0.001     |
| Admission to ICU                                                     | 1.52 (1.37, 1.69)<br><0.001     | 1.54 (1.39, 1.72)<br><0.001     |
| Predicting admission to general ward unit or discharge from hospital | 1.54 (1.27, 1.86)<br><0.001     | 1.55 (1.28, 1.89)<br><0.001     |

Abbreviation: CI, confidence intervals; ICU, intensive care unit; OR, odds ratios.

Model 1, original model; Model 2 with adjustment for age and gender. Presented as OR with 95% CI (MEWS  $\geq 4$ , and MEWS  $< 4$  as reference).

1  
2  
3 **Figure 1** The flow chart of study procedure.  
4  
5

6  
7 **Figure 2** The AUC value of MEWS for predicting the in-hospital mortality.  
8

9 Blue shading shows the bootstrap estimated 95% CI with AUC.  
10  
11

12  
13  
14 **Figure 3** The AUC value of MEWS for predicting admission to Intensive Care Unit.  
15

16 Blue shading shows the bootstrap estimated 95% CI with AUC.  
17  
18

19  
20 **Figure 4** The AUC value of MEWS for predicting admission to general ward unit or discharge  
21

22 from hospital. Blue shading shows the bootstrap estimated 95% CI with AUC.  
23  
24  
25  
26  
27  
28  
29  
30  
31  
32  
33  
34  
35  
36  
37  
38  
39  
40  
41  
42  
43  
44  
45  
46  
47  
48  
49  
50  
51  
52  
53  
54  
55  
56  
57  
58  
59  
60

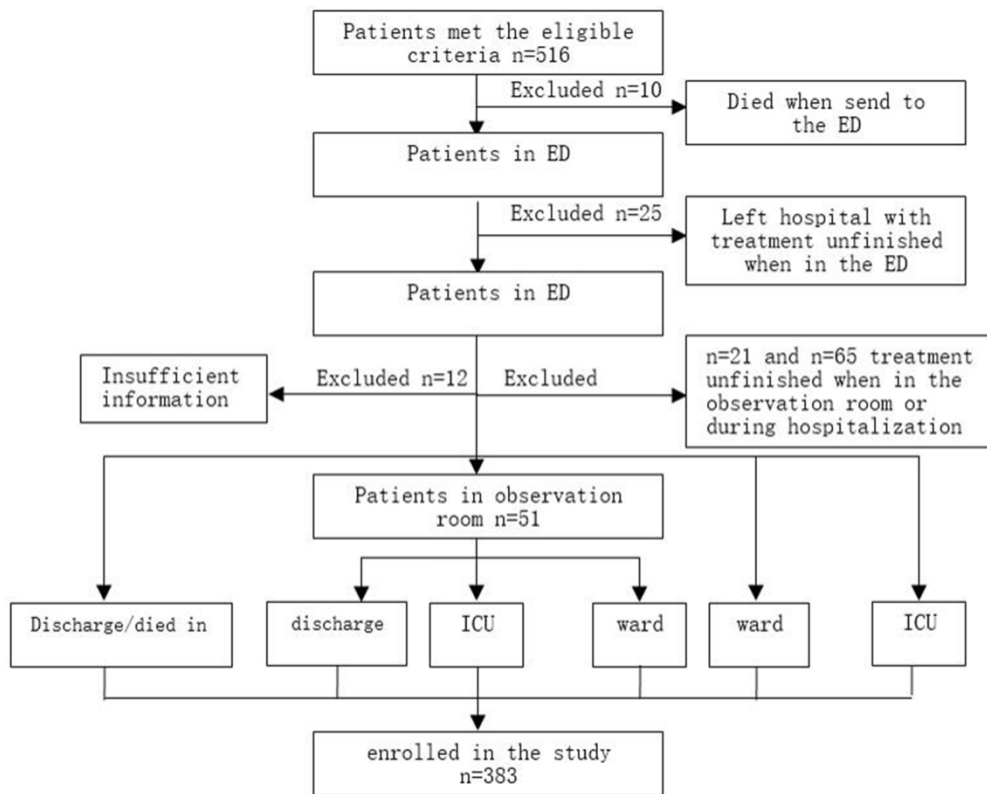

Figure 1 The flow chart of study procedure

Figure 1

204x177mm (300 x 300 DPI)

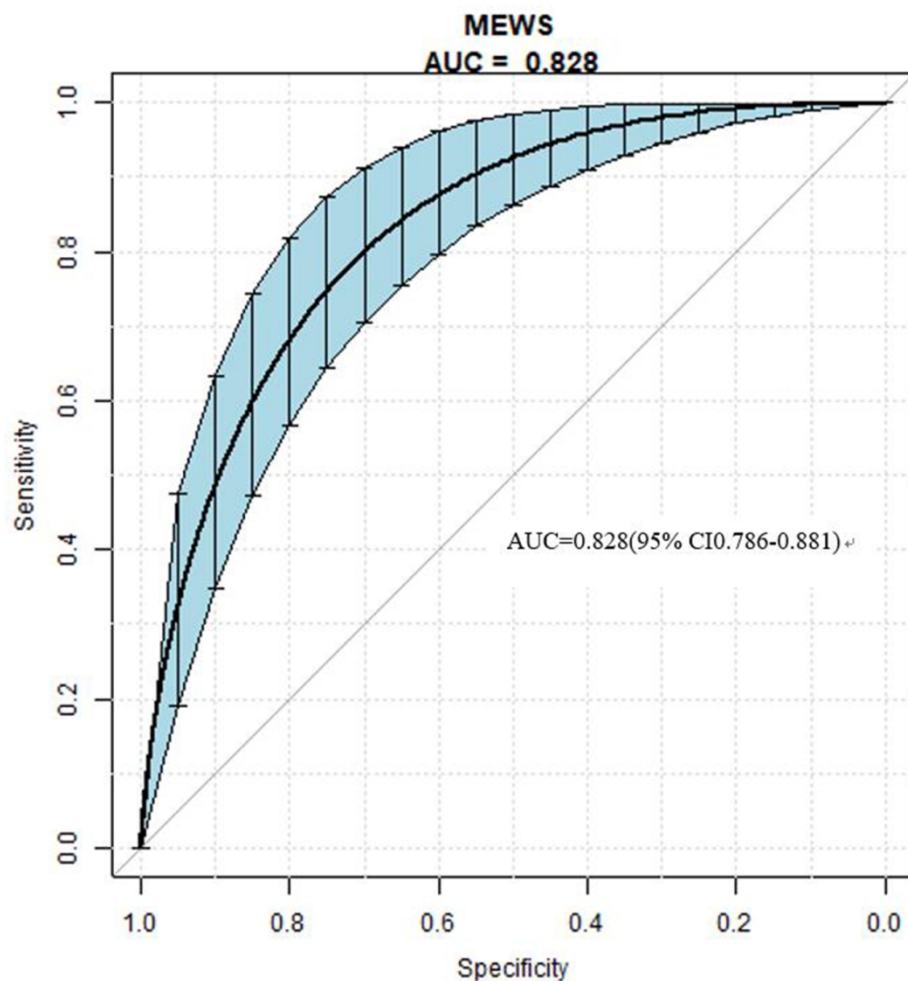

38 Figure 2 The AUC value of MEWS for predicting the in-hospital mortality.

39  
40 Blue shading shows the bootstrap estimated 95% CI with the AUC.

41  
42  
43 Figure

44 128x146mm (300 x 300 DPI)

1  
2  
3  
4  
5  
6  
7  
8  
9  
10  
11  
12  
13  
14  
15  
16  
17  
18  
19  
20  
21  
22  
23  
24  
25  
26  
27  
28  
29  
30  
31  
32  
33  
34  
35  
36  
37  
38  
39  
40  
41  
42  
43  
44  
45  
46  
47  
48  
49  
50  
51  
52  
53  
54  
55  
56  
57  
58  
59  
60

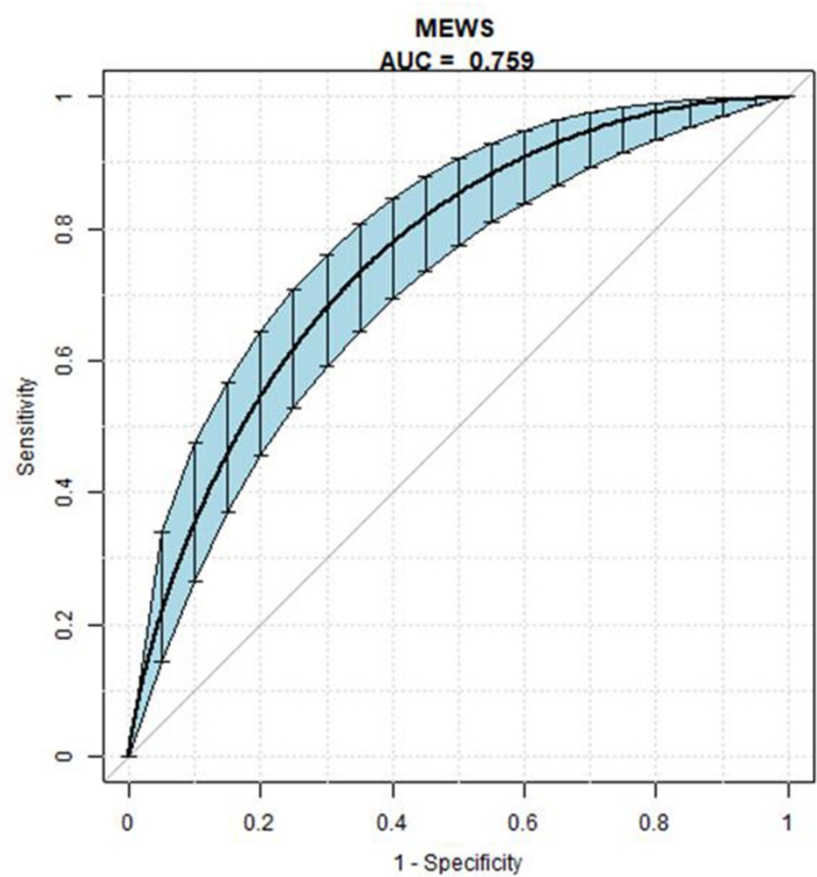

**Figure 3** The AUC value of MEWS for predicting admission to Intensive Care Unit  
Blue shading shows the bootstrap estimated 95% CI with AUC.

Figure 3

181x178mm (300 x 300 DPI)



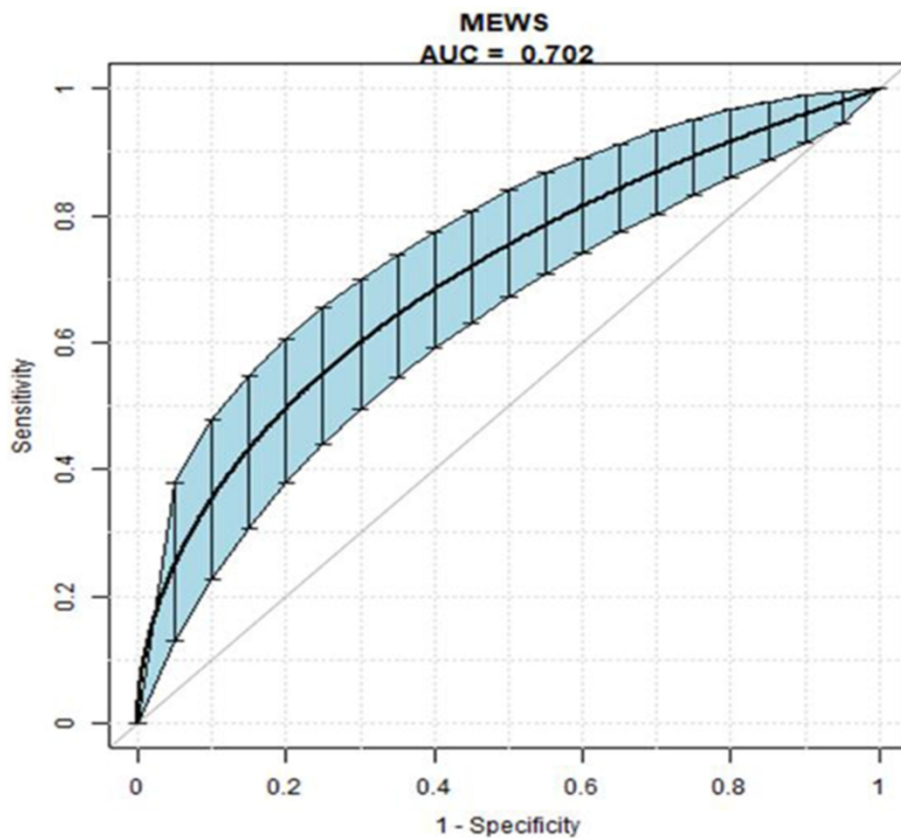

**Figure 4** The AUC value of MEWS for predicting admission to general ward unit or discharged from hospital  
Blue shading shows the bootstrap estimated 95% CI with AUC.

Figure 4

268x244mm (300 x 300 DPI)

**Appendix 1** The Modified Early Warning Score

| Parameters                     | 3   | 2     | 1      | 0       | 1                 | 2                | 3            |
|--------------------------------|-----|-------|--------|---------|-------------------|------------------|--------------|
| Respiratory rate (bpm)         | —   | <9    | —      | 9-14    | 15-20             | 21-29            | ≥30          |
| Heart rate (bpm)               | —   | <40   | 41-50  | 51-100  | 101-111           | 112-129          | ≥130         |
| Systolic blood pressure (mmHg) | <70 | 71-80 | 81-100 | 101-199 | —                 | ≥200             | —            |
| AVPU score                     | —   | —     | —      | Alert   | Reacting to voice | Reacting to pain | Unresponsive |
| Temperature (°C)               | —   | <35.0 | —      | 35-38.4 | —                 | ≥38.5            | —            |

AVPU, A: alert, V: Reacting to voice, P: Reacting to pain, U: unresponsive; bpm, beats or breaths per minute.

**STROBE 2007 (v4) Statement—Checklist of items that should be included in reports of *observational studies***

| Section/Topic                | Item # | Recommendation                                                                                                                                                                       | Reported on page # |
|------------------------------|--------|--------------------------------------------------------------------------------------------------------------------------------------------------------------------------------------|--------------------|
| Title and abstract           | 1      | (a) Indicate the study's design with a commonly used term in the title or the abstract                                                                                               | P1-2               |
|                              |        | (b) Provide in the abstract an informative and balanced summary of what was done and what was found                                                                                  | P2-3               |
| <b>Introduction</b>          |        |                                                                                                                                                                                      |                    |
| Background/rationale         | 2      | Explain the scientific background and rationale for the investigation being reported                                                                                                 | P5-6               |
| Objectives                   | 3      | State specific objectives, including any prespecified hypotheses                                                                                                                     | P6                 |
| <b>Methods</b>               |        |                                                                                                                                                                                      |                    |
| Study design                 | 4      | Present key elements of study design early in the paper                                                                                                                              | P7                 |
| Setting                      | 5      | Describe the setting, locations, and relevant dates, including periods of recruitment, exposure, follow-up, and data collection                                                      | P8                 |
| Participants                 | 6      | (a) Give the eligibility criteria, and the sources and methods of selection of participants                                                                                          | P7                 |
| Variables                    | 7      | Clearly define all outcomes, exposures, predictors, potential confounders, and effect modifiers. Give diagnostic criteria, if applicable                                             | P9                 |
| Data sources/<br>measurement | 8*     | For each variable of interest, give sources of data and details of methods of assessment (measurement). Describe comparability of assessment methods if there is more than one group | P8-9               |
| Bias                         | 9      | Describe any efforts to address potential sources of bias                                                                                                                            | P10                |
| Study size                   | 10     | Explain how the study size was arrived at                                                                                                                                            | P7                 |
| Quantitative variables       | 11     | Explain how quantitative variables were handled in the analyses. If applicable, describe which groupings were chosen and why                                                         | P8-9               |
| Statistical methods          | 12     | (a) Describe all statistical methods, including those used to control for confounding                                                                                                | P9-10              |
|                              |        | (b) Describe any methods used to examine subgroups and interactions                                                                                                                  | P9-10              |
|                              |        | (c) Explain how missing data were addressed                                                                                                                                          | P9-10              |
|                              |        | (d) If applicable, describe analytical methods taking account of sampling strategy                                                                                                   | P9-10              |
|                              |        | (e) Describe any sensitivity analyses                                                                                                                                                | P9-10              |
| <b>Results</b>               |        |                                                                                                                                                                                      |                    |

|                          |     |                                                                                                                                                                                                              |              |
|--------------------------|-----|--------------------------------------------------------------------------------------------------------------------------------------------------------------------------------------------------------------|--------------|
| Participants             | 13* | (a) Report numbers of individuals at each stage of study—eg numbers potentially eligible, examined for eligibility, confirmed eligible, included in the study, completing follow-up, and analysed            | P7           |
|                          |     | (b) Give reasons for non-participation at each stage                                                                                                                                                         | P25-Figure1  |
|                          |     | (c) Consider use of a flow diagram                                                                                                                                                                           | P25-Figure 1 |
| Descriptive data         | 14* | (a) Give characteristics of study participants (eg demographic, clinical, social) and information on exposures and potential confounders                                                                     | P21-Table 1  |
|                          |     | (b) Indicate number of participants with missing data for each variable of interest                                                                                                                          | P10          |
| Outcome data             | 15* | Report numbers of outcome events or summary measures                                                                                                                                                         | P10-11       |
| Main results             | 16  | (a) Give unadjusted estimates and, if applicable, confounder-adjusted estimates and their precision (eg, 95% confidence interval). Make clear which confounders were adjusted for and why they were included | P10-11       |
|                          |     | (b) Report category boundaries when continuous variables were categorized                                                                                                                                    | P10-11       |
|                          |     | (c) If relevant, consider translating estimates of relative risk into absolute risk for a meaningful time period                                                                                             | P10-11       |
| Other analyses           | 17  | Report other analyses done—eg analyses of subgroups and interactions, and sensitivity analyses                                                                                                               | P10-11       |
| <b>Discussion</b>        |     |                                                                                                                                                                                                              |              |
| Key results              | 18  | Summarise key results with reference to study objectives                                                                                                                                                     | P12-13       |
| Limitations              | 19  | Discuss limitations of the study, taking into account sources of potential bias or imprecision. Discuss both direction and magnitude of any potential bias                                                   | P14          |
| Interpretation           | 20  | Give a cautious overall interpretation of results considering objectives, limitations, multiplicity of analyses, results from similar studies, and other relevant evidence                                   | P12-13       |
| Generalisability         | 21  | Discuss the generalisability (external validity) of the study results                                                                                                                                        | P12-13       |
| <b>Other information</b> |     |                                                                                                                                                                                                              |              |
| Funding                  | 22  | Give the source of funding and the role of the funders for the present study and, if applicable, for the original study on which the present article is based                                                | P16          |

\*Give information separately for cases and controls in case-control studies and, if applicable, for exposed and unexposed groups in cohort and cross-sectional studies.

**Note:** An Explanation and Elaboration article discusses each checklist item and gives methodological background and published examples of transparent reporting. The STROBE checklist is best used in conjunction with this article (freely available on the Web sites of PLoS Medicine at <http://www.plosmedicine.org/>, Annals of Internal Medicine at <http://www.annals.org/>, and Epidemiology at <http://www.epidem.com/>). Information on the STROBE Initiative is available at [www.strobe-statement.org](http://www.strobe-statement.org).

# BMJ Open

## Prognostic value of Modified Early Warning Score generated in a Chinese emergency department: A prospective cohort study

|                                 |                                                                                                                                                                                                                                                                                                                                                                                                                                                                                                                                                                                                                                             |
|---------------------------------|---------------------------------------------------------------------------------------------------------------------------------------------------------------------------------------------------------------------------------------------------------------------------------------------------------------------------------------------------------------------------------------------------------------------------------------------------------------------------------------------------------------------------------------------------------------------------------------------------------------------------------------------|
| Journal:                        | <i>BMJ Open</i>                                                                                                                                                                                                                                                                                                                                                                                                                                                                                                                                                                                                                             |
| Manuscript ID                   | bmjopen-2018-024120.R3                                                                                                                                                                                                                                                                                                                                                                                                                                                                                                                                                                                                                      |
| Article Type:                   | Research                                                                                                                                                                                                                                                                                                                                                                                                                                                                                                                                                                                                                                    |
| Date Submitted by the Author:   | 29-Oct-2018                                                                                                                                                                                                                                                                                                                                                                                                                                                                                                                                                                                                                                 |
| Complete List of Authors:       | Xie, Xiaohua; The Second People's Hospital of Shenzhen<br>Huang, Wenlong ; The People's Hospital of Longhua<br>Liu, Qiongling ; Guangdong Medical University, School of Nursing<br>Tan, Wei ; The Second People's Hospital of Shenzhen, Emergency Department<br>Pan, Lu ; The Second People's Hospital of Shenzhen<br>Wang, Lei ; Guangzhou Medical University, School of Nursing<br>Zhang, Jian ; Guangzhou Medical University, School of Nursing<br>Wang, Yunyun ; Anhui Medical University, School of Nursing<br>Zeng, Y; The Third Affiliated Hospital of Guangzhou Medical University, Research Institute of Gynecology and Obstetrics |
| <b>Primary Subject Heading</b>: | Nursing                                                                                                                                                                                                                                                                                                                                                                                                                                                                                                                                                                                                                                     |
| Secondary Subject Heading:      | Emergency medicine, Health services research                                                                                                                                                                                                                                                                                                                                                                                                                                                                                                                                                                                                |
| Keywords:                       | ("Modified Early Warning Score") OR "MEWS", ("Emergency") AND "triage", Emergency department                                                                                                                                                                                                                                                                                                                                                                                                                                                                                                                                                |
|                                 |                                                                                                                                                                                                                                                                                                                                                                                                                                                                                                                                                                                                                                             |

SCHOLARONE™  
Manuscripts

1  
2  
3 **Title: Prognostic value of Modified Early Warning Score generated in a Chinese**  
4  
5 **emergency department: A prospective cohort study**  
6  
7

8  
9 Xiaohua Xie,<sup>1</sup> Wenlong Huang,<sup>2</sup> Qiongling Liu,<sup>3</sup> Wei Tan,<sup>4</sup> Lu Pan,<sup>5</sup> Lei Wang,<sup>6</sup> Jian Zhang,<sup>6</sup>  
10  
11 Yunyun Wang,<sup>7</sup> Yingchun Zeng<sup>8</sup>  
12  
13

14 <sup>1</sup>Department of Nursing, The Second People's Hospital of Shenzhen, The First Affiliated Hospital  
15 of Shenzhen University, Shenzhen, China  
16  
17

18  
19  
20 <sup>2</sup>Department of Nursing, The People's Hospital of Longhua, Shenzhen, China  
21  
22

23 <sup>3</sup>School of Nursing, Guangdong Medical University, Dongguan, China  
24  
25

26 <sup>4</sup>Emergency Department, The Second People's Hospital of Shenzhen, The First Affiliated Hospital  
27 of Shenzhen University, Shenzhen, China  
28  
29

30  
31 <sup>5</sup>Department of Intensive Care Unit, The Second People's Hospital of Shenzhen, The First  
32 Affiliated Hospital of Shenzhen University, Shenzhen, China  
33  
34

35  
36  
37 <sup>6</sup>School of Nursing, Guangzhou Medical University, Guangzhou, China  
38  
39

40 <sup>7</sup>School of Nursing, Anhui Medical University, Hefei, China  
41  
42

43 <sup>8</sup>Research Institute of Gynecology and Obstetrics, The Third Affiliated Hospital of Guangzhou  
44 Medical University, Guangzhou, China  
45  
46

47  
48 **Corresponding author:** Dr Yingchun Zeng, Research Institute of Gynecology and Obstetrics,  
49 The Third Affiliated Hospital of Guangzhou Medical University, Guangzhou, China 510150. Tel:  
50  
51 +86-2081292216. Email: [chloezengyc@hotmail.co.uk](mailto:chloezengyc@hotmail.co.uk)  
52  
53  
54  
55  
56  
57

## ABSTRACT

**Objectives** This study aimed to validate the performance of the Modified Early Warning Score (MEWS) in a Chinese emergency department, and to determine the best cut-off value for in-hospital mortality prediction.

**Design** A prospective, single-centred observational cohort study.

**Setting** This study was conducted at a tertiary hospital in South China.

**Participants** A total of 383 patients, ages 18 years or older who presented to the emergency department from May 17, 2017 through September 27, 2017, triaged as Category 1, 2, or 3, were enrolled.

**Outcomes** The primary outcome was a composite of in-hospital mortality and admission to the intensive care unit. The secondary outcome was using MEWS to predict hospitalised and discharged patients.

**Results** A total of 383 patients were included in this study. In-hospital mortality was 13.6% (52/383), and transfer to the ICU was 21.7% (83/383). The area under the ROC curve of MEWS for in-hospital mortality prediction was 0.83 (95% CI: 0.786, 0.881). When predicting in-hospital mortality with the cut-off point defined as 3.5, 158 patients had MEWS>3.5, with a specificity of 66%, a sensitivity of 87%, accuracy of 69%, a positive predictive value of 28%, and a negative predictive value of 97%, respectively.

**Conclusion** Our findings support the use of MEWS for in-hospital mortality prediction in patients who were triaged Category 1, 2, or 3 in a Chinese emergency department. The cut-off value for

1  
2  
3 in-hospital mortality prediction defined in this study was different from that seen in many other  
4  
5 studies.  
6  
7

8 **Keywords:** Modified Early Warning Score; Triage; In-hospital mortality; Emergency department  
9  
10  
11  
12  
13  
14  
15  
16  
17  
18  
19  
20  
21  
22  
23  
24  
25  
26  
27  
28  
29  
30  
31  
32  
33  
34  
35  
36  
37  
38  
39  
40  
41  
42  
43  
44  
45  
46  
47  
48  
49  
50  
51  
52  
53  
54  
55  
56  
57  
58  
59  
60

For peer review only



### Study strengths and limitations

- This prospective observational study was carried out according to workflow, which is the most cost-effective option, and reduces difficulty in data collection.
- This study used a prospective study design and provided a new cut-off point for the MEWS using ROC curve analysis to increase sensitivity in predicting in-hospital mortality.
- This study evaluated the MEWS only once, on patient admission, which means that dynamic changes in the score could not be observed during patient hospitalisation.
- This prospective cohort study recruited participants at a single medical centre, which could limit the generalisability of the study findings.

## INTRODUCTION

Different kinds of triage systems have been developed worldwide to assess the illness severity of patients presenting to emergency departments (ED) who are assigned treatment priorities.<sup>1,2</sup> In China, there is a lack of a unified triage standard to manage patients when they present to the emergency department.<sup>3</sup> The triage standard used in hospitals in Shenzhen is a new four-level Chinese emergency triage criteria, published by the Public Hospital Administration of Shenzhen Municipality in August, 2013.<sup>3</sup> It categorises patients as near death (Level 1), critically ill (Level 2), acute (Level 3), and not acute (Level 4), requiring treatment immediately, in 10 minutes, in 30 minutes, and in four hours, respectively. This is mainly decided according to patients' presenting complaints and questions about potentially aggravating factors. According to acuity, Level 1, Level 2, and Level 3 are urgent patients with a higher risk of serious adverse events, such as hospital admission and mortality, compared to Level 4, which describes non-urgent patients.<sup>4,5</sup>

Therefore, an excellent scoring system is urgently required for mortality predictions in patients admitted to the ED. Today, there are a number of scoring systems designed to predict the chances of hospitalisation, intensive care unit (ICU) admission, or in-hospital mortality in emergency department ED patients.<sup>6,7</sup> The VitalPac Early Warning Score (VIEWS), Modified Early Warning Score (MEWS), Rapid Emergency Medicine Score (REMS), Emergency Department Sepsis Score (MEDS), and Rapid Acute Physiology Score are the most commonly employed systems for bedside evaluation.<sup>8-12</sup>

MEWS was introduced in 2001 by Subbe and colleagues,<sup>13</sup> who modified it from the Early Warning Score (EWS). The MEWS is a simple physiological scoring system, which includes five physiological parameters - systolic blood pressure, pulse rate, respiratory rate, temperature, and

1  
2  
3 level of consciousness - that can easily be collected at the moment of presentation. The MEWS is  
4 widely used in wards, the ICU, and emergency departments to detect the clinical deterioration of  
5 patients or to predict clinical outcomes.<sup>6,7,13</sup>  
6  
7  
8  
9

10 A large number of studies have reported that MEWS is an effective tool for in-hospital mortality  
11 prediction.<sup>14-17</sup> However, there have also been studies conducted on different populations or in  
12 different areas reporting that MEWS is not an adequate scoring system for predicting in-hospital  
13 mortality.<sup>18,19</sup> Moreover, the MEWS cut-off value (for in-hospital mortality prediction reported in  
14 studies) varies.<sup>9,10,15,20-22</sup> A study conducted on 518 patients in ICU indicated that patients with  
15 MEWS $\geq$ 6 had significantly higher mortality than those with a MEWS $<$ 6.<sup>22</sup> However, another  
16 study, which examined the performance of MEWS in assessing non-traumatic critical patients in  
17 an emergency department, showed the MEWS cut-off value was 3.<sup>15</sup> Therefore, this study  
18 hypothesises that MEWS performance and cut-off value may differ according to the specific  
19 population.  
20  
21  
22  
23  
24  
25  
26  
27  
28  
29  
30  
31  
32  
33

34 The MEWS is also used to evaluate patient conditions in Chinese emergency departments,  
35 including focusing on the relationship between factors and clinical outcomes, using pre-hospital  
36 MEWS to identify non-trauma patients requiring life-saving intervention, and risk stratification of  
37 patients before inter-facility transport.<sup>23-25</sup> However, information on MEWS validation is limited  
38 to in-hospital mortality predictions in patients triaged as Level 1, 2, or 3 in Chinese emergency  
39 departments. Hence, the aim of this study was to evaluate MEWS performance in predicting in-  
40 hospital mortality of the population in a Chinese emergency treatment room, and to find the best  
41 cut-off value.  
42  
43  
44  
45  
46  
47  
48  
49  
50  
51  
52  
53  
54  
55  
56  
57  
58  
59  
60

## METHODS

### Study design

A prospective, single-centred observational cohort study was conducted in the ED of a tertiary hospital in Shenzhen, China to evaluate the ability of the MEWS to predict in-hospital mortality in patients presenting to the emergency treatment room who were categorised Level 1, 2, or 3. The study was approved by the hospital ethics committee.

### Study population

The study was carried out at the tertiary hospital, the First Affiliated Hospital of Shenzhen University, which saw 173,000 ED presentations in 2017. Of the 173,000 ED presentations, approximately 6,600 patients were admitted to the emergency treatment room. Data of patients presenting to the emergency treatment room between May 17, 2017 and September 27, 2017 were collected. Eligibility criteria: patients ages 18 years or older triaged as Category 1, 2, and 3 were included in the study. Exclusion criteria: Patients who had died prior to arrival in the ED, and patients who needed ward admission, ICU admission, or rescue according to the doctor's judgment, or who ignored the doctor's advice and left the hospital due to a variety of reasons, were excluded from the study. Patients with insufficient information were also excluded.

### Sample size calculation

This study calculated sample size using G\*Power 3.1.9.2 (<http://www.softpedia.com/get/Science-CAD/G-Power.shtml>). The estimated sample size was 319 with an accuracy index of 0.95, a marginal error of 0.05 with 95% confidence level and 80% power.

## Participant involvement and data collection

Patients who presented to our ED were evaluated and triaged by the triage nurse, who had more than five years of experience. Patients were triaged to near death (Level 1), critically ill (Level 2), acute (Level 3) and not acute (Level 4). This is decided according to the triage guidelines and the judgment of the triage nurse. According to acuity, patients triaged to Levels 1 and 2 were sent to the emergency treatment room; patients triaged to Level 3 were given priority in the consulting room or sent to the emergency treatment room if the triage nurse judged the patient's condition to be serious; and patients triaged to Level 4 were sent to wait outside the consulting room.

Physiological parameters were measured by nurses and researchers at the time of admittance to the emergency treatment room. Respiratory rate was counted manually for more than a full minute; heart rate and blood pressure were measured using an automatic electronic sphygmomanometer (HBP-9020) or multifunctional ECG monitor (PHILIPS Jin Kewei, G30). Body temperature was measured using an infrared ear thermometer (Pr04000). The level of consciousness was recorded as the best response to the AVPU score (A for alert, V for reacting to vocal stimulus, P for reacting to pain and U for unresponsive). Patient information was recorded using a questionnaire designed by the researchers. The following information was included: age, gender, nationality, educational background, mode of transportation to hospital, disease type, main diagnosis, body temperature, systolic blood pressure, diastolic blood pressure, pulse rate, respiratory rate, peripheral oxygen saturation, and the AVPU (A: alert, V: voice, P: pain, and U: unresponsive) score, triage level, MEWS score (Appendix 1), and mortality.

The patients were followed up by the researcher until discharge, death, or for a maximum of 90 days. The researchers calculated the MEWS using patients' five recorded physiological parameters.

1  
2  
3 In-hospital mortality was the main outcome. The predictive accuracy of the MEWS was evaluated  
4  
5 by the Receiver Operating Characteristic (ROC) curve. Sensitivity, specificity, accuracy, and  
6  
7 positive and negative predictive value (PPV and NPV) were analysed to indicate the predictive  
8  
9 power of the scoring system. The patients were divided into two groups:  $MEWS < 4$  and  $MEWS \geq 4$ .  
10  
11  
12 The intergroup differences in the baseline characteristic physiological parameters and the scores  
13  
14 between the two groups were also evaluated.  
15  
16  
17

### 18 **Outcomes**

19  
20  
21 The primary outcome was a composite of in-hospital mortality and admission to the ICU. The  
22  
23 secondary outcome of this study was using MEWS to predict admission to the general ward unit  
24  
25 or discharge from hospital.  
26  
27

### 28 **Ethics statement**

29  
30  
31 This study was approved by the medical ethical committee of the Second People's Hospital of  
32  
33 Shenzhen (No. 20141201005). Written informed consent was obtained from research participants  
34  
35 or patients' legal agents.  
36  
37

### 38 **Statistical analysis**

39  
40  
41 Descriptive statistics were tabulated for the overall sample. Mean and standard deviation were  
42  
43 calculated for continuous variables, and frequencies and percentages for all other categorical  
44  
45 variables. Data distribution of each variable between the  $MEWS < 4$  and the  $MEWS \geq 4$  groups was  
46  
47 compared. In addition, the area under the receiver operating characteristic curve (AUC) was  
48  
49 measured to evaluate the predictive ability of the MEWS. Finally, sensitivity, specificity, accuracy,  
50  
51 positive and negative predictive values (PPV and NPV) were also analysed. Regression analysis  
52  
53  
54  
55  
56  
57

1  
2  
3 was used to address confounding variables of age and gender.  $P < 0.05$  was regarded as statistically  
4 significant. EPidata 3.1 was used for data entry, and then exported to tab-delimited text files. All  
5 analyses were performed using R (<http://www.R-project.org>) and EmpowerStats software  
6 ([www.empowerstats.com](http://www.empowerstats.com), X&Y Solutions, Inc. Boston MA).  
7  
8  
9  
10  
11  
12  
13  
14  
15

## 16 RESULTS

17  
18  
19 A total of 516 patients met the eligibility criteria, with 133 patients excluded. Among the patients  
20 who were excluded from the study, 10 had already died when they were sent to the ED, while 46  
21 patients in the ED ignored the advice of doctors and left the hospital, due to a variety of reasons.  
22 Another 65 patients left the hospital after being admitted to the ward or ICU. Twelve patients were  
23 excluded due to insufficient information (Figure 1). Ultimately, 383 patients were enrolled in the  
24 study. Of that total, 255 (66.6%) patients were male; the mean age of all patients was  $59.6 \pm 18.3$   
25 years, and the ethnicity of the majority of patients was Han Chinese (98.2%). Among the 383  
26 patients, 52.5% and 21.7% were admitted to the ward and ICU from the ED, respectively. Nervous  
27 system, cardiovascular, and respiratory diseases were the three most common disease types seen  
28 in these patients, consisting of more than half of the population. In the baseline characteristics  
29 between groups  $MEWS < 4$  and  $MEWS \geq 4$ , a number of baseline characteristics showed significant  
30 differences, with  $P < 0.05$ . Detailed patient baseline characteristics are shown in Table 1.  
31  
32  
33  
34  
35  
36  
37  
38  
39  
40  
41  
42  
43  
44  
45  
46

47 The patients were divided into two groups:  $MEWS \geq 4$  and  $MEWS < 4$ . Physiological parameters  
48 include body temperature, systolic blood pressure, diastolic blood pressure, heart rate, respiratory  
49 rate, percutaneous oxygen saturation and mental status, which were different between the two  
50 groups, and the difference was statistically significant. However, between the two groups, there  
51  
52  
53  
54  
55  
56  
57  
58  
59  
60

1  
2  
3 were no differences in terms of blood sugar and length of stay. In addition, a total of 277 critically  
4 ill patients were triaged as Level 1 and Level 2, requiring treatment within 10 minutes. There were  
5 more critically ill patients in the MEWS  $\geq 4$  group than in the MEWS  $< 4$  group (150/158 VS.  
6 127/225,  $P < 0.001$ ). The proportion of in-hospital mortality was 13.6% (52/383), with most of  
7 these patients in the MEWS  $\geq 4$  group (7/52 versus 45/52,  $P < 0.001$ ). Detailed physiological  
8 parameters of the two groups are outlined in Table 2.  
9  
10  
11  
12  
13  
14  
15  
16  
17  
18

19 The MEWS in-hospital mortality predictive ability is shown by area under the Receiver Operating  
20 Characteristic curve (AUC), at 0.83 (95% CI, 0.786-0.881) (Figure 2). Logistic regression analysis  
21 was used to examine the association between MEWS and the primary and secondary outcome  
22 measures. As seen in Table 3, the MEWS was significantly associated with in-hospital mortality  
23 (odds ratios-OR, 1.65; 95% CI, 1.44-1.89;  $P < 0.001$ ), admission to ICU (OR, 1.54; 95% CI, 1.39-  
24 1.72,  $P < 0.001$ ), and predicting admission to a general ward unit or discharge from hospital (OR,  
25 1.55; 95% CI, 1.28-1.89,  $P < 0.001$ ) (Table 3). The MEWS in-hospital mortality, predictive ability  
26 of admission to ICU, and predictive ability of admission to a general ward unit or discharge from  
27 hospital are shown in Figure 2, Figure 3, and Figure 4, respectively.  
28  
29  
30  
31  
32  
33  
34  
35  
36  
37  
38  
39  
40  
41  
42

## 43 DISCUSSION

44  
45  
46 In this observational cohort study, the MEWS showed good performance for in-hospital mortality  
47 prediction with AUC values at 0.83. The higher the score, the higher the ratio of in-hospital  
48 mortality, indicating that MEWS was significantly correlated with patient mortality. In patients  
49 with MEWS  $\geq 4$ , compared with MEWS  $< 4$ , a number of variables, such as age, triage level, vital  
50 signs, means of arrival, and disease type, are influencing factors of death in ED patients. The study  
51  
52  
53  
54  
55  
56  
57  
58  
59  
60



1  
2  
3 demonstrated that MEWS is an effective tool for in-hospital mortality prediction for ED patients  
4 who triage to Levels 1, 2, and 3.  
5  
6

7  
8 MEWS is a widely used scoring system in many countries, but differences between these studies,  
9 including study setting, population, and disease type, has led to differences in the predictive ability  
10 of the MEWS. The AUC, specificity, and sensitivity were the most common indexes reported in  
11 studies on MEWS performance.<sup>17,20,26,27</sup> A large proportion of studies have reported that MEWS  
12 is an effective tool for mortality prediction, with AUC ranging from approximately 0.70-0.89 for  
13 the most frequently used threshold (MEWS=5), and specificity and sensitivity ranging from 0.67-  
14 0.72, 0.65-0.71, respectively.<sup>9,17,20,26</sup> However, less information was provided on the accuracy,  
15 positive predictive value, and negative predictive value of the score. In a single-centre  
16 observational cohort study conducted at an urban tertiary care medical centre in Chicago, adult  
17 patients who were suspected of contracting an infection in a hospital ward or emergency  
18 department (ED) were included.<sup>20</sup> Discrimination for in-hospital mortality was moderate with  
19 MEWS AUC 0.73 (95% CI, 0.71-0.74).  
20  
21  
22  
23  
24  
25  
26  
27  
28  
29  
30  
31  
32  
33  
34  
35  
36

37 Furthermore, there are also studies demonstrating that MEWS is not an efficient system for  
38 mortality prediction with an approximate AUC of less than 0.6, with study populations that  
39 included septic patients admitted to medical wards, surgical patients presenting to emergency  
40 departments, and adults admitted to medical wards, respectively.<sup>9,17,22</sup> This study showed that  
41 disease and population differences seem to strongly determine MEWS performance. However,  
42 MEWS performance in ED patients who were triaged as Level 1, 2, or 3 had previously not been  
43 validated. Our study found that mortality prediction for the MEWS is good (AUC, 0.83; 95% CI,  
44 0.79-0.88).  
45  
46  
47  
48  
49  
50  
51  
52  
53  
54  
55  
56  
57  
58  
59  
60

1  
2  
3 When combined with sensitivity and specificity, the maximum was defined as the best threshold.  
4  
5 In this study, in order to increase the proportion of in-hospital mortality prediction and reduce  
6  
7 missed diagnoses, sensitivity is more important than specificity. When the threshold was 4, the  
8  
9 specificity, accuracy, and NPV improved at the cost of sensitivity and PPV, and the number of  
10  
11 deaths due to missed diagnosis increased from 6 to 16. Hence, this study defined the MEWS cut-  
12  
13 off point as 4, which was different from a previous prospective study, whose MEWS cut-off point  
14  
15 was defined as 3.<sup>15</sup> However, the MEWS cut-off point defined as 3 in this study was different from  
16  
17 that of many other studies, whose MEWS cut-off point was defined as 5 or higher.<sup>10,20-22</sup> For the  
18  
19 baseline characteristics of patients in this study, respiratory system diseases, digestive system  
20  
21 diseases, circulatory system diseases, and nervous system diseases were found in 70.7% of the  
22  
23 population and 67.3% of non-survivors, with the median (IQR) MEWS at 3 (3). Different kinds of  
24  
25 diseases and populations may have contributed to the difference. In general, our study provides  
26  
27 evidence that the MEWS is an efficient system for in-hospital mortality prediction in an ED.  
28  
29  
30  
31  
32  
33  
34  
35  
36

### 37 **Limitations and implications for future research**

38  
39  
40 There are several limitations in our study. First, this was a single-centre observational cohort study  
41  
42 at a tertiary hospital in Shenzhen. Patient outcomes may have been affected by the level of care  
43  
44 provided by the hospital, and may therefore have also affected the performance of the Modified  
45  
46 Early Warning Score for in-hospital mortality prediction. Second, the population included in this  
47  
48 study was selected according to triage criteria that were only published in Shenzhen. Therefore,  
49  
50 our study results may not be generalisable to other settings. Third, we evaluated the MEWS only  
51  
52 once, on patient admission. Dynamic changes in the score could not be observed during patient  
53  
54  
55  
56  
57  
58  
59  
60

1  
2  
3 hospitalisation. Hence, we could not exclude the possibility that re-evaluation of this clinical score  
4 during hospitalisation may have improved or reduced the MEWS performance in this setting. In  
5  
6 future, a multicentre study should be conducted, to reduce the effect of the sample size not being  
7  
8 representative. In addition, due to the varied performance of MEWS in other studies, research on  
9  
10 specific diseases is also required, in order for the use of MEWS to be more accurate. While the  
11  
12 actual number of enrolled subjects was 383 (higher than the required sample size of 319), we  
13  
14 excluded 133 patients in the analysis due to missing data, resulting in potential selection bias.  
15  
16 Thus, future research should implement strategies to minimise missing data in patient report forms.  
17  
18  
19  
20  
21  
22  
23  
24

## 25 **CONCLUSION**

26  
27  
28 This study found that MEWS was an accurate score for predicting in-hospital mortality and  
29 admission to ICU in a Chinese emergency department. Future multicentric prospective cohort  
30  
31 studies are needed to validate the study findings. As patients with MEWS equal to or higher than  
32  
33 4 had higher rates of in-hospital mortality and ICU admission, calculating MEWS may be an  
34  
35 important indicator for closely monitoring patients, making an immediate request to contact the  
36  
37 doctor-in-charge, and establishing a rapid response intervention team. In this hospital, the ED  
38  
39 triage system has already added MEWS as one of the vital parameter monitors, and designed an  
40  
41 algorithm in the triage system that can automatically calculate MEWS.  
42  
43  
44  
45  
46  
47  
48  
49  
50  
51  
52  
53  
54  
55  
56  
57  
58  
59  
60

1  
2  
3 **Acknowledgments** We sincerely thank Xinglin Chen for her excellent assistance with the  
4 statistical analyses. We also thank all patients for participating in this study.  
5  
6  
7

8 **Contributorship statement** Study design: XX, WH and QL; data acquisition: WH; data analysis  
9 and interpretation: WH, LP, LW, JZ, YW and YZ; project administration: XX and WT; manuscript  
10 first draft: XX and WH; statistical analysis: WH; manuscript revision: WT, YZ.  
11  
12  
13  
14  
15

16 **Funding** This work was supported by the Science and Technology Department of Guangdong  
17 Province, China. Grant number (2014A020212574).  
18  
19  
20

21 **Competing interests** None declared.  
22  
23

24 **Ethical approval** The study was approved by the ethical committee of the Second People's  
25 Hospital of Shenzhen.  
26  
27  
28  
29

30 **Provenance and peer review** Not commissioned; externally peer reviewed.  
31  
32

33 **Data sharing statement** We are glad to share data collected in this study upon request from the  
34 corresponding author.  
35  
36  
37  
38

39 **Open Access** This is an Open Access article distributed in accordance with the Creative Commons  
40 Attribution Non-Commercial (CC BY-NC 4.0) license, which permits others to distribute, remix,  
41 adapt, build upon this work non-commercially, and license their derivative works on different  
42 terms, provided the original work is properly cited and the use is non-commercial. See:  
43  
44  
45  
46  
47  
48 <http://creativecommons.org/licenses/by-nc/4.0/>.  
49  
50  
51  
52  
53  
54  
55  
56  
57  
58  
59  
60

## References

1. Krey J. Triage in emergency departments. Comparative evaluation of 4 international triage systems. *Med Klin Intensivmed Notfmed* 2016;111(2):124-133. doi: 10.1007/s00063-015-0069-0. Epub 2015 Sep 11.
2. Chang W, Liu HE, Goopy S, *et al.* Using the Five-Level Taiwan Triage and Acuity Scale Computerized System: Factors in Decision Making by Emergency Department Triage Nurses. *Clin Nurs Res* 2017;26(5):651-666. doi: 10.1177/1054773816636360. Epub 2016 Mar 2.
3. Peng L, Hammad K. Current status of emergency department triage in mainland China: A narrative review of the literature. *Nurs Health Sci* 2015;17(2):148-158. doi: 10.1111/nhs.12159. Epub 2014 Sep 8.
4. Municipality PHAoS. The hospital emergency triage guidelines (Trial). 2013.
5. Yuksen C, Sawatmongkornkul S, Suttabuth S, *et al.* Emergency severity index compared with 4-level triage at the emergency department of Ramathibodi University Hospital. *Asian Biomedicine* 2016;10(2): 155 - 161. doi: 10.5372/1905-7415.1002.477.
6. Zachariasse JM, Seiger N, Rood PP, *et al.* Validity of the Manchester Triage System in emergency care: A prospective observational study. *PloS one* 2017;12(2):e0170811. doi: 10.1371/journal.pone.0170811. eCollection 2017.
7. Nannan Panday RS, Minderhoud TC, Alam N, *et al.* Prognostic value of early warning scores in the emergency department (ED) and acute medical unit (AMU): A narrative review. *Eur J Intern Med* 2017;45:20-31. doi: 10.1016/j.ejim.2017.09.027. Epub 2017 Oct 7.
8. Mapp ID, Davis LL, Krowchuk H. Prevention of unplanned intensive care unit admissions and hospital mortality by early warning systems. *Dimens Crit Care Nurs* 2013;32(6):300-309. doi: 10.1097/DCC.0000000000000004.
9. Dundar ZD, Ergin M, Karamercan MA, *et al.* Modified Early Warning Score and VitalPac Early Warning Score in geriatric patients admitted to emergency department. *Eur J Emerg Med* 2016;23(6):406-412. doi: 10.1097/MEJ.0000000000000274.
10. Bulut M, Cebicci H, Sigirli D, *et al.* The comparison of modified early warning score with rapid emergency medicine score: a prospective multicentre observational cohort study on

- 1  
2  
3 medical and surgical patients presenting to emergency department. *Emerg Med J*  
4 2014;31(6):476-481. doi: 10.1136/emermed-2013-202444. Epub 2013 Apr 6.  
5  
6  
7 11. van Galen LS, Dijkstra CC, Ludikhuizen J, *et al.* A Protocolised Once a Day Modified Early  
8 Warning Score (MEWS) Measurement Is an Appropriate Screening Tool for Major Adverse  
9 Events in a General Hospital Population. *PLoS One* 2016;11(8):e0160811. doi:  
10 10.1371/journal.pone.0160811. eCollection 2016.  
11  
12  
13 12. Hung SK, Ng CJ, Kuo CF, *et al.* Comparison of the Mortality in Emergency Department  
14 Sepsis Score, Modified Early Warning Score, Rapid Emergency Medicine Score and Rapid  
15 Acute Physiology Score for predicting the outcomes of adult splenic abscess patients in the  
16 emergency department. *PloS one* 2017;12(11):e0187495. doi:  
17 10.1371/journal.pone.0187495. eCollection 2017.  
18  
19  
20 13. Subbe CP, Kruger M, Rutherford P, *et al.* Validation of a modified Early Warning Score in  
21 medical admissions. *QJM* 2001;94(10):521-526.  
22  
23  
24 14. Churpek MM, Yuen TC, Winslow C, *et al.* Differences in vital signs between elderly and  
25 nonelderly patients prior to ward cardiac arrest. *Crit Care Med* 2015;43(4):816. doi:  
26 10.1097/CCM.0000000000000818.  
27  
28  
29 15. Koksall O, Torun G, Ahun E, *et al.* The comparison of modified early warning score and  
30 Glasgow coma scale-age-systolic blood pressure scores in the assessment of nontraumatic  
31 critical patients in Emergency Department. *Niger J Clin Pract* 2016;19(6):761-765. doi:  
32 10.4103/1119-3077.178944.  
33  
34  
35 16. Delgado-Hurtado JJ, Berger A, Bansal AB. Emergency department Modified Early  
36 Warning Score association with admission, admission disposition, mortality, and length of  
37 stay. *J Community Hosp Intern Med Perspect* 2016;6(2):31456. doi:  
38 10.3402/jchimp.v6.31456. eCollection 2016.  
39  
40  
41 17. Churpek MM, Yuen TC, Winslow C, *et al.* Multicenter Development and Validation of a  
42 Risk Stratification Tool for Ward Patients. *Am J Respir Crit Care Med* 2014;190(6):649-  
43 655. doi: 10.1164/rccm.201406-1022OC.  
44  
45  
46 18. Tirota D, Gambacorta M, La Regina M, *et al.* Evaluation of the threshold value for the  
47 modified early warning score (MEWS) in medical septic patients: a secondary analysis of  
48 an Italian multicentric prospective cohort (SNOOPII study). *QJM* 2017;110(6):369-373.  
49 doi: 10.1093/qjmed/hcw229.  
50  
51  
52  
53  
54  
55  
56  
57  
58  
59  
60

19. Ho le O, Li H, Shahidah N, *et al*, Hock Ong ME. Poor performance of the modified early warning score for predicting mortality in critically ill patients presenting to an emergency department. *World J Emerg Med* 2013;4(4):273-278. doi: 10.5847/wjem.j.1920-8642.2013.04.005.
20. Churpek MM, Snyder A, Han X, *et al*. Quick Sepsis-related Organ Failure Assessment, Systemic Inflammatory Response Syndrome, and Early Warning Scores for Detecting Clinical Deterioration in Infected Patients outside the Intensive Care Unit. *Am J Respir Crit Care Med* 2017;195(7):906. doi: 10.1164/rccm.201604-0854OC.
21. Kruisselbrink R, Kwizera A, Crowther M, *et al*. Modified Early Warning Score (MEWS) Identifies Critical Illness among Ward Patients in a Resource Restricted Setting in Kampala, Uganda: A Prospective Observational Study. *PloS one* 2016;11(3):e0151408. doi: 10.1371/journal.pone.0151408. eCollection 2016.
22. Reini K, Fredrikson M, Oscarsson A. The prognostic value of the Modified Early Warning Score in critically ill patients: a prospective, observational study. *Eur J Anaesthesiol* 2012;29(3):152-157. doi: 10.1097/EJA.0b013e32835032d8.
23. Gu M, Fu Y, Li C, *et al*. [The value of modified early warning score in predicting early mortality of critically ill patients admitted to emergency department]. *Zhonghua wei zhong bing ji jiu yi xue* 2015;27(8):687-690. doi: 10.3760/cma.j.issn.2095-4352.2015.08.014.
24. Leung SC, Leung LP, Fan KL, *et al*. Can prehospital Modified Early Warning Score identify non-trauma patients requiring life-saving intervention in the emergency department? *Emerg Med Australas : EMA* 2016;28(1):84-89. doi: 10.1111/1742-6723.12501. Epub 2015 Nov 25.
25. Lee LL, Yeung KL, Lo WY, *et al*. Evaluation of a simplified therapeutic intervention scoring system (TISS-28) and the modified early warning score (MEWS) in predicting physiological deterioration during inter-facility transport. *Resuscitation* 2008;76(1):47-51. DOI: 10.1016/j.resuscitation.2007.07.005
26. Eick C, Rizas KD, Grogabada P, *et al*. Autonomic Nervous System Activity as Risk Predictor in the Medical Emergency Department: A Prospective Cohort Study. *Crit Care Med* 2015;43(5):1079-1086. doi: 10.1097/CCM.0000000000000922.
27. Wheeler I, Price C, Sitch A, *et al*. Early warning scores generated in developed healthcare settings are not sufficient at predicting early mortality in Blantyre, Malawi: a prospective

1  
2  
3  
4  
5  
6  
7  
8  
9  
10  
11  
12  
13  
14  
15  
16  
17  
18  
19  
20  
21  
22  
23  
24  
25  
26  
27  
28  
29  
30  
31  
32  
33  
34  
35  
36  
37  
38  
39  
40  
41  
42  
43  
44  
45  
46  
47  
48  
49  
50  
51  
52  
53  
54  
55  
56  
57  
58  
59  
60

cohort study. *PloS one* 2013;8(3):e59830. doi: 10.1371/journal.pone.0059830. Epub 2013 Mar 29.

For peer review only



**Table 1** Baseline characteristics between groups MEWS<4 and MEWS≥4

| Characteristics            | All (n, %) | MEWS<4     | MEWS≥4     | P value |
|----------------------------|------------|------------|------------|---------|
|                            | n=383      | n=225      | n=158      |         |
| <b>Age (Mean, SD)</b>      | 59.6(18.3) | 57.9(16.9) | 62.1(19.9) | 0.008   |
| <b>Gender</b>              |            |            |            | 0.43    |
| Male                       | 255(66.6)  | 159 (70.7) | 96 (60.8)  |         |
| Female                     | 128 (33.4) | 66 (29.3)  | 62 (39.2)  |         |
| <b>Ethnicity</b>           |            |            |            | 0.525   |
| Han                        | 376 (98.2) | 222 (98.7) | 154 (97.5) |         |
| Hui                        | 1 (0.2)    | 0 (0.0)    | 1 (0.6)    |         |
| Manchu                     | 6 (1.6)    | 3 (1.3)    | 3 (1.9)    |         |
| <b>Means of arrival</b>    |            |            |            | 0.009   |
| Walking                    | 123 (32.1) | 86 (38.2)  | 37 (23.4)  |         |
| Wheelchair                 | 8 (2.1)    | 4 (1.8)    | 4 (2.5)    |         |
| Ambulance                  | 252 (66.8) | 135 (60.0) | 117 (74.1) |         |
| <b>Triage</b>              |            |            |            | <0.001  |
| Discharged from ED         | 38 (9.9)   | 31 (13.8)  | 7 (4.4)    |         |
| Observation room           | 51 (13.3)  | 39 (17.3)  | 12 (7.6)   |         |
| Ward admission             | 201 (52.5) | 126 (56.0) | 75 (47.5)  |         |
| ICU admission              | 83 (21.7)  | 28 (12.4)  | 55 (34.8)  |         |
| Died in ED                 | 10 (2.6)   | 1 (0.5)    | 9 (5.7)    |         |
| <b>Disease types</b>       |            |            |            | 0.003   |
| Respiratory system         | 54 (14.1)  | 19 (8.4)   | 35 (22.2)  |         |
| Digestive system           | 36 (9.4)   | 23 (10.2)  | 13 (8.2)   |         |
| Cardiovascular system      | 82 (21.4)  | 50 (22.2)  | 32 (20.3)  |         |
| Nervous system             | 99 (25.8)  | 69 (30.7)  | 30 (19.0)  |         |
| Hematological system       | 3 (0.8)    | 3 (1.3)    | 0 (0.0)    |         |
| Endocrinologic, metabolism | 3 (0.8)    | 3 (1.3)    | 0 (0.0)    |         |
| Urinary system             | 15 (3.9)   | 7 (3.1)    | 8 (5.1)    |         |
| Trauma                     | 28 (7.3)   | 17 (7.56)  | 11 (7.0)   |         |
| Others                     | 63 (16.5)  | 34 (15.1)  | 29 (18.4)  |         |

Abbreviations: SD, standard deviation; ED, emergency department; ICU, intensive care unit.

**Table 2** Comparison of clinical parameters between patients MEWS <4 and MEWS $\geq$ 4

| Parameters                   | All (n, %)<br>n=383 | MEWS<4<br>n=225 | MEWS $\geq$ 4<br>n=158 | P value |
|------------------------------|---------------------|-----------------|------------------------|---------|
| <b>Age</b> (Mean, SD)        | 59.6 (18.3)         | 57.9 (16.9)     | 62.1 (19.9)            | 0.008   |
| <b>Gender</b>                |                     |                 |                        | 0.430   |
| Male                         | 255 (66.6)          | 159 (70.7)      | 96 (60.8)              |         |
| Female                       | 128 (33.4)          | 66 (29.3)       | 62 (39.2)              |         |
| <b>Physiology</b> (Mean, SD) |                     |                 |                        |         |
| Temperature ( $^{\circ}$ C)  | 37.2 (1.0)          | 36.9 (0.6)      | 37.6 (1.2)             | <0.001  |
| SBP (mmHg)                   | 136.6 (33.6)        | 140.9 (29.6)    | 130.3 (37.9)           | 0.001   |
| DBP (mmHg)                   | 80.3 (21.1)         | 82.8 (18.4)     | 76.80 (24.0)           | 0.002   |
| Heart rate (bpm)             | 95.2 (30.8)         | 80.7 (15.4)     | 116.0 (35.0)           | <0.001  |
| Respiratory rate (bpm)       | 23.1 (6.3)          | 20.7 (3.0)      | 26.6 (7.9)             | <0.001  |
| SPO2 median (IQR)            | 99.0 (4)            | 99 (2)          | 98 (5)                 | <0.001  |
| BS median (IQR)              | 8.0 (3.4)           | 8.0 (3.2)       | 8.2 (3.6)              | 0.461   |
| LOS median (IQR)             | 12 (11)             | 11 (9)          | 14 (14)                | 0.068   |
| <b>Mental status</b>         |                     |                 |                        | <0.001  |
| Alert                        | 280 (73.1)          | 193 (85.8)      | 87 (55.1)              |         |
| Reacting to voice            | 39 (10.1)           | 21 (9.3)        | 18 (11.4)              |         |
| Reacting to pain             | 32 (8.4)            | 10 (4.4)        | 22 (13.9)              |         |
| Unresponsive                 | 32 (8.4)            | 1 (0.4)         | 31 (19.6)              |         |
| <b>Triage level</b>          |                     |                 |                        | <0.001  |
| Level 1                      | 69 (18.0)           | 8 (3.6)         | 61 (38.6)              |         |
| Level 2                      | 208 (54.3)          | 119 (52.9)      | 89 (56.3)              |         |
| Level 3                      | 106 (27.7)          | 98 (43.6)       | 80 (5.1)               |         |
| <b>Survivors</b>             | 331 (86.4)          | 218 (96.9)      | 113 (71.5)             | <0.001  |
| <b>Non-survivors</b>         | 52 (13.6)           | 7 (3.1)         | 45 (28.5)              | <0.001  |

Abbreviations: SD, standard deviation; bpm, beats or breaths per minute; BS, blood sugar; DBP, diastolic blood pressure; IQR, interquartile range, LOS, length of stay, SBP, systolic blood pressure; SPO, percutaneous oxygen saturation.

**Table 3** Association of MEWS with in-hospital mortality, admission to ICU, and predicting admission to general ward unit or discharge from hospital

| MEWS                                                                       | Model 1 OR (95% CI)<br><i>P</i> | Model 2 OR (95% CI)<br><i>P</i> |
|----------------------------------------------------------------------------|---------------------------------|---------------------------------|
| In-hospital mortality                                                      | 1.66 (1.45, 1.90)<br><0.001     | 1.65 (1.44, 1.89)<br><0.001     |
| Admission to ICU                                                           | 1.52 (1.37, 1.69)<br><0.001     | 1.54 (1.39, 1.72)<br><0.001     |
| Predicting admission to<br>general ward unit or<br>discharge from hospital | 1.54 (1.27, 1.86)<br><0.001     | 1.55 (1.28, 1.89)<br><0.001     |

Abbreviation: CI, confidence intervals; ICU, intensive care unit; OR, odds ratios.

Model 1, original model; Model 2 with adjustment for age and gender. Presented as OR with 95% CI (MEWS  $\geq 4$ , and MEWS  $< 4$  as reference).

1  
2  
3 **Figure 1** The flow chart of study procedure.  
4  
5  
6

7 **Figure 2** The AUC value of MEWS for predicting the in-hospital mortality.  
8  
9

10 Blue shading shows the bootstrap estimated 95% CI with AUC.  
11  
12  
13

14 **Figure 3** The AUC value of MEWS for predicting admission to Intensive Care Unit.  
15  
16

17 Blue shading shows the bootstrap estimated 95% CI with AUC.  
18  
19

20 **Figure 4** The AUC value of MEWS for predicting admission to general ward unit or discharge  
21  
22

23 from hospital. Blue shading shows the bootstrap estimated 95% CI with AUC.  
24  
25  
26  
27  
28  
29  
30  
31  
32  
33  
34  
35  
36  
37  
38  
39  
40  
41  
42  
43  
44  
45  
46  
47  
48  
49  
50  
51  
52  
53  
54  
55  
56  
57  
58  
59  
60

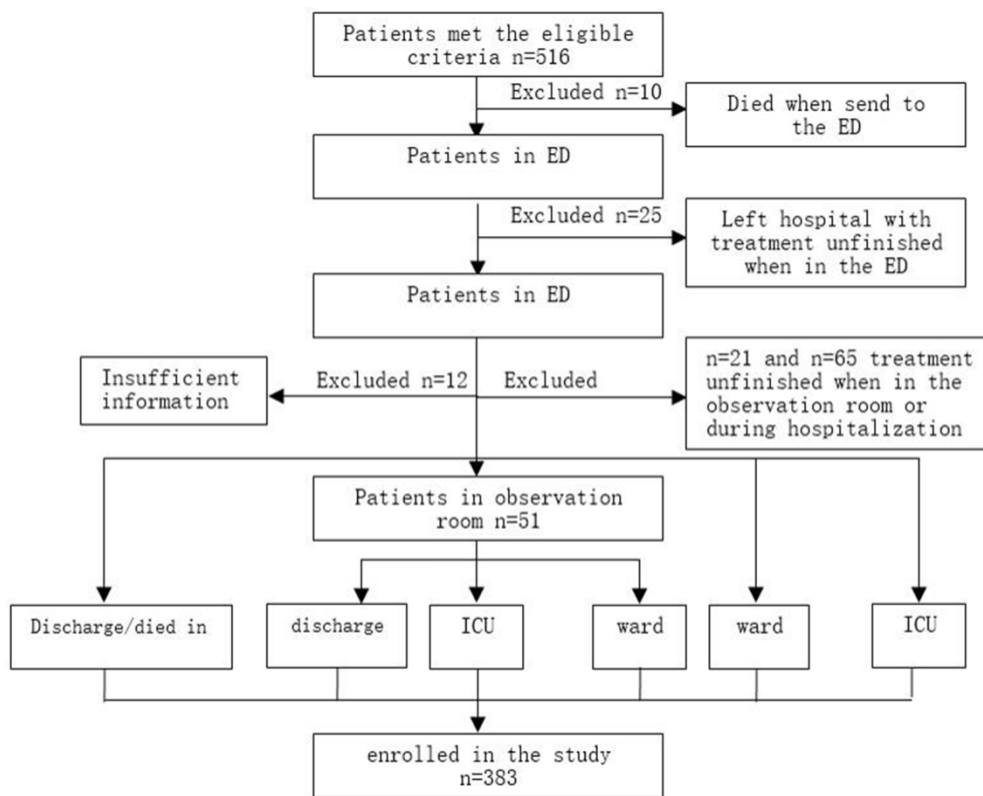

**Figure 1** The flow chart of study procedure

Figure 1

204x177mm (300 x 300 DPI)



Figure 2 The AUC value of MEWS for predicting the in-hospital mortality.

Blue shading shows the bootstrap estimated 95% CI with the AUC.

Figure

128x146mm (300 x 300 DPI)



35 **Figure 3** The AUC value of MEWS for predicting admission to Intensive Care Unit  
36 Blue shading shows the bootstrap estimated 95% CI with AUC.

37  
38 Figure 3

39 181x178mm (300 x 300 DPI)

1  
2  
3  
4  
5  
6  
7  
8  
9  
10  
11  
12  
13  
14  
15  
16  
17  
18  
19  
20  
21  
22  
23  
24  
25  
26  
27  
28  
29  
30  
31  
32  
33  
34  
35  
36  
37  
38  
39  
40  
41  
42  
43  
44  
45  
46  
47  
48  
49  
50  
51  
52  
53  
54  
55  
56  
57  
58  
59  
60

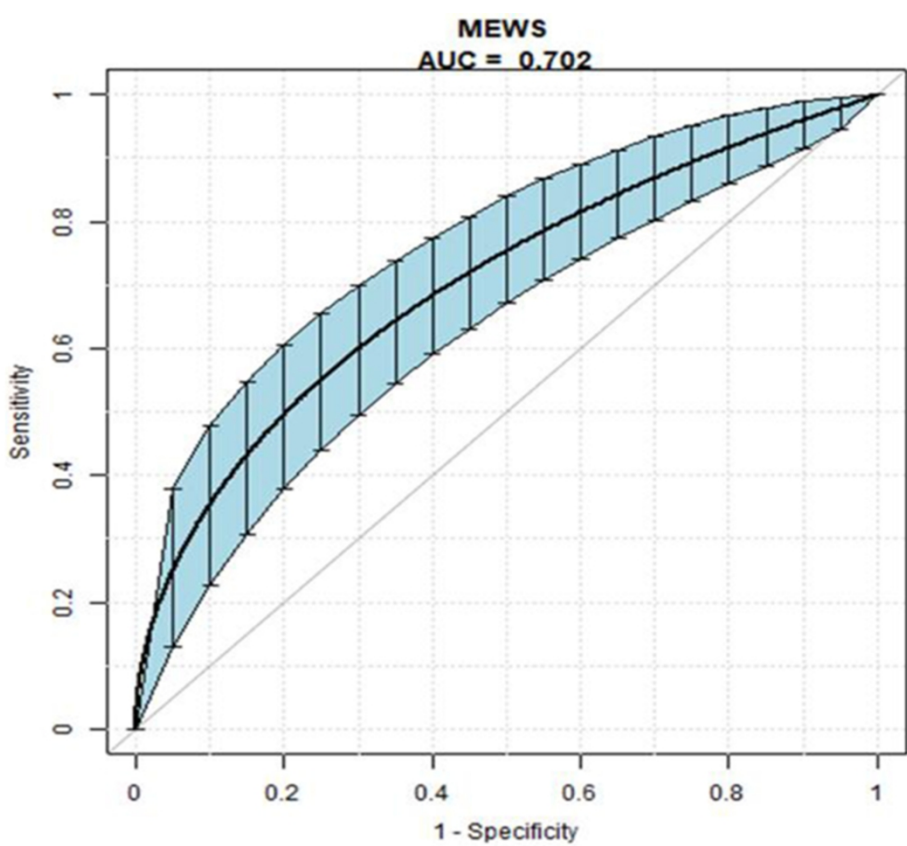

**Figure 4** The AUC value of MEWS for predicting admission to general ward unit or discharged from hospital  
Blue shading shows the bootstrap estimated 95% CI with AUC.

Figure 4

268x244mm (300 x 300 DPI)



**Appendix 1** The Modified Early Warning Score

| Parameters                     | 3   | 2     | 1      | 0       | 1                 | 2                | 3            |
|--------------------------------|-----|-------|--------|---------|-------------------|------------------|--------------|
| Respiratory rate (bpm)         | —   | <9    | —      | 9-14    | 15-20             | 21-29            | ≥30          |
| Heart rate (bpm)               | —   | <40   | 41-50  | 51-100  | 101-111           | 112-129          | ≥130         |
| Systolic blood pressure (mmHg) | <70 | 71-80 | 81-100 | 101-199 | —                 | ≥200             | —            |
| AVPU score                     | —   | —     | —      | Alert   | Reacting to voice | Reacting to pain | Unresponsive |
| Temperature (°C)               | —   | <35.0 | —      | 35-38.4 | —                 | ≥38.5            | —            |

AVPU, A: alert, V: Reacting to voice, P: Reacting to pain, U: unresponsive; bpm, beats or breaths per minute.

**STROBE 2007 (v4) Statement—Checklist of items that should be included in reports of *observational studies***

| Section/Topic                | Item # | Recommendation                                                                                                                                                                       | Reported on page # |
|------------------------------|--------|--------------------------------------------------------------------------------------------------------------------------------------------------------------------------------------|--------------------|
| Title and abstract           | 1      | (a) Indicate the study's design with a commonly used term in the title or the abstract                                                                                               | P1-2               |
|                              |        | (b) Provide in the abstract an informative and balanced summary of what was done and what was found                                                                                  | P2-3               |
| <b>Introduction</b>          |        |                                                                                                                                                                                      |                    |
| Background/rationale         | 2      | Explain the scientific background and rationale for the investigation being reported                                                                                                 | P5-6               |
| Objectives                   | 3      | State specific objectives, including any prespecified hypotheses                                                                                                                     | P6                 |
| <b>Methods</b>               |        |                                                                                                                                                                                      |                    |
| Study design                 | 4      | Present key elements of study design early in the paper                                                                                                                              | P7                 |
| Setting                      | 5      | Describe the setting, locations, and relevant dates, including periods of recruitment, exposure, follow-up, and data collection                                                      | P8                 |
| Participants                 | 6      | (a) Give the eligibility criteria, and the sources and methods of selection of participants                                                                                          | P7                 |
| Variables                    | 7      | Clearly define all outcomes, exposures, predictors, potential confounders, and effect modifiers. Give diagnostic criteria, if applicable                                             | P9                 |
| Data sources/<br>measurement | 8*     | For each variable of interest, give sources of data and details of methods of assessment (measurement). Describe comparability of assessment methods if there is more than one group | P8-9               |
| Bias                         | 9      | Describe any efforts to address potential sources of bias                                                                                                                            | P10                |
| Study size                   | 10     | Explain how the study size was arrived at                                                                                                                                            | P7                 |
| Quantitative variables       | 11     | Explain how quantitative variables were handled in the analyses. If applicable, describe which groupings were chosen and why                                                         | P8-9               |
| Statistical methods          | 12     | (a) Describe all statistical methods, including those used to control for confounding                                                                                                | P9-10              |
|                              |        | (b) Describe any methods used to examine subgroups and interactions                                                                                                                  | P9-10              |
|                              |        | (c) Explain how missing data were addressed                                                                                                                                          | P9-10              |
|                              |        | (d) If applicable, describe analytical methods taking account of sampling strategy                                                                                                   | P9-10              |
|                              |        | (e) Describe any sensitivity analyses                                                                                                                                                | P9-10              |
| <b>Results</b>               |        |                                                                                                                                                                                      |                    |

|                          |     |                                                                                                                                                                                                              |              |
|--------------------------|-----|--------------------------------------------------------------------------------------------------------------------------------------------------------------------------------------------------------------|--------------|
| Participants             | 13* | (a) Report numbers of individuals at each stage of study—eg numbers potentially eligible, examined for eligibility, confirmed eligible, included in the study, completing follow-up, and analysed            | P7           |
|                          |     | (b) Give reasons for non-participation at each stage                                                                                                                                                         | P25-Figure1  |
|                          |     | (c) Consider use of a flow diagram                                                                                                                                                                           | P25-Figure 1 |
| Descriptive data         | 14* | (a) Give characteristics of study participants (eg demographic, clinical, social) and information on exposures and potential confounders                                                                     | P21-Table 1  |
|                          |     | (b) Indicate number of participants with missing data for each variable of interest                                                                                                                          | P10          |
| Outcome data             | 15* | Report numbers of outcome events or summary measures                                                                                                                                                         | P10-11       |
| Main results             | 16  | (a) Give unadjusted estimates and, if applicable, confounder-adjusted estimates and their precision (eg, 95% confidence interval). Make clear which confounders were adjusted for and why they were included | P10-11       |
|                          |     | (b) Report category boundaries when continuous variables were categorized                                                                                                                                    | P10-11       |
|                          |     | (c) If relevant, consider translating estimates of relative risk into absolute risk for a meaningful time period                                                                                             | P10-11       |
| Other analyses           | 17  | Report other analyses done—eg analyses of subgroups and interactions, and sensitivity analyses                                                                                                               | P10-11       |
| <b>Discussion</b>        |     |                                                                                                                                                                                                              |              |
| Key results              | 18  | Summarise key results with reference to study objectives                                                                                                                                                     | P12-13       |
| Limitations              | 19  | Discuss limitations of the study, taking into account sources of potential bias or imprecision. Discuss both direction and magnitude of any potential bias                                                   | P14          |
| Interpretation           | 20  | Give a cautious overall interpretation of results considering objectives, limitations, multiplicity of analyses, results from similar studies, and other relevant evidence                                   | P12-13       |
| Generalisability         | 21  | Discuss the generalisability (external validity) of the study results                                                                                                                                        | P12-13       |
| <b>Other information</b> |     |                                                                                                                                                                                                              |              |
| Funding                  | 22  | Give the source of funding and the role of the funders for the present study and, if applicable, for the original study on which the present article is based                                                | P16          |

\*Give information separately for cases and controls in case-control studies and, if applicable, for exposed and unexposed groups in cohort and cross-sectional studies.

**Note:** An Explanation and Elaboration article discusses each checklist item and gives methodological background and published examples of transparent reporting. The STROBE checklist is best used in conjunction with this article (freely available on the Web sites of PLoS Medicine at <http://www.plosmedicine.org/>, Annals of Internal Medicine at <http://www.annals.org/>, and Epidemiology at <http://www.epidem.com/>). Information on the STROBE Initiative is available at [www.strobe-statement.org](http://www.strobe-statement.org).
