# Supplementary material for: Prognostic value of Modified Early Warning Score generated in a Chinese emergency department: a prospective cohort study
Source: PubMed Central journal article supplement — BMJ Open. 2018 Dec 14;8(12):e024120. doi: 10.1136/bmjopen-2018-024120 (PMC6303659; doi:10.1136/bmjopen-2018-024120), 2018-12-14
Supplement: bmjopen-2018-024120supp001.pdf [file bmjopen-2018-024120supp001.pdf]

**Appendix 1** The Modified Early Warning Score

| Parameters                     | 3   | 2     | 1      | 0       | 1                 | 2                | 3            |
|--------------------------------|-----|-------|--------|---------|-------------------|------------------|--------------|
| Respiratory rate (bpm)         | —   | <9    | —      | 9-14    | 15-20             | 21-29            | ≥30          |
| Heart rate (bpm)               | —   | <40   | 41-50  | 51-100  | 101-111           | 112-129          | ≥130         |
| Systolic blood pressure (mmHg) | <70 | 71-80 | 81-100 | 101-199 | —                 | ≥200             | —            |
| AVPU score                     | —   | —     | —      | Alert   | Reacting to voice | Reacting to pain | Unresponsive |
| Temperature (°C)               | —   | <35.0 | —      | 35-38.4 | —                 | ≥38.5            | —            |

AVPU, A: alert, V: Reacting to voice, P: Reacting to pain, U: unresponsive; bpm, beats or breaths per minute.
